# Supplementary material for: Simultaneous single-cell three-dimensional genome and gene expression profiling Uncovers Dynamic Enhancer Connectivity Underlying Olfactory Receptor Choice
Source: Research Square preprint supplement (doi:10.21203/rs.3.rs-3210240/v1), 2023-08-03
Supplement: Supplementary file 1 [file 046e30dd8f32be2b159cd42a.xlsx]

## Sheet: candidate enhancers
name	mm10 coordinates	peak_id
Thassos	chr1: 173137256-173137757	Peak-17250
Lesbos	chr2: 85730458-85730959	Peak-30667
Samos	chr2: 86098544-86099045	Peak-30673
Aegina	chr4: 58670572-58671073	Peak-64141
Lesbos	chr4: 118821109-118821610	Peak-70292
Kefalonia	chr4: 118923458-118923959	Peak-70296
Samothrace	chr6: 116553829-116554330	Peak-109915
Gyaros	chr8: 85225527-85226028	Peak-140510
Astypalaia	chr9: 18751721-18752222	Peak-148907
Salamis	chr9: 39561617-39562118	Peak-151210
Alonnisos	chr10: 79028468-79028969	Peak-172603
Thirasia	chr10: 129068792-129069293	Peak-179597
Antikythera	chr11: 49153914-49154415	Peak-184492
Kythera	chr11: 49422787-49423288	Peak-184525
Skiros	chr11: 51162350-51162851	Peak-184838
Lefkada	chr11: 52201415-52201916	Peak-185060
Rineia	chr11: 59593102-59593603	Peak-186236
Ithaca	chr11: 73592792-73593293	Peak-188963
Schinousa	chr13: 21087962-21088463	Peak-214496
Astypalea	chr13: 21618597-21619098	Peak-214572
Syros	chr14: 50614524-50615025	Peak-231661
Spetses	chr14: 14265625-14266125	Peak-227593
Skopelos	chr15: 98499570-98500071	Peak-249674
Strongyli	chr16: 19434729-19435230	Peak-253083
Kalolimnos	chr17: 33210519-33211020	Peak-266489
Farmakonisi	chr19: 14121848-14122349	Peak-285975
Schiza	chrX: 50195564-50196065	Peak-294209
