# Supplementary material for: Simultaneous single-cell three-dimensional genome and gene expression profiling Uncovers Dynamic Enhancer Connectivity Underlying Olfactory Receptor Choice
Source: Research Square preprint supplement (doi:10.21203/rs.3.rs-3210240/v1), 2023-08-03
Supplement: Supplementary file 2 [file 07d884465b67442f5fcdf63d.xlsx]

## Sheet: Sheet1
Cell	Read number (RNA)	Read number (genomic)	Count (RNA)	Genes (detected)	Mitocondria rna (%)	Ribosome rna (%)	S_score	G2M_score	Inferred cell cycle (RNA)	Raw contacts	Contacts	Contacts (short cis)	Contacts (long cis)	Contacts (trans)	Contacts (short-range, 25kb-2mb)	Contacts (mitotic-range, 2-12mb)	%duplication (contacts)	Contacts (imputed)	20kb RMS RMSD	20kb Median RMSD
GM12878_cell_001	5086986	12192529	2.50763e+06	10352	12.09	6.63	0.23262	0.00696	S	3382649	941842	273389	480542	187911	245913	62499	72.16	345465	1.157	0.338
GM12878_cell_002	4351311	9983066	2.14367e+06	9549	14.48	6.84	0.11923	0.03746	S	3105469	740168	211064	363798	165306	191975	52992	76.17	266671	5.698	5.512
GM12878_cell_003	4371060	22062880	1.31623e+06	5146	16.63	7.46	-0.1094	-0.08194	G1	5477094	1197675	229205	589725	378745	293890	117206	78.13	483164	0.629	0.089
GM12878_cell_004	4670940	26011221	2.56692e+06	9134	11.24	6.5	0.30801	-0.16062	S	7504378	944257	267825	475282	201150	246590	61205	87.42	317093	3.969	3.557
GM12878_cell_005	6319061	16345297	3.66995e+06	9792	13.8	5.5	0.14995	0.12129	S	4908976	615032	156048	322168	136816	150093	51370	87.47	174446	2.202	0.728
GM12878_cell_006	6724203	21607667	3.43616e+06	8863	10.36	5.94	0.37986	-0.16165	S	6333334	769021	211568	376026	181427	208734	49465	87.86	273084	1.874	0.446
GM12878_cell_007	6043251	25985924	3.09076e+06	8486	16.06	7.32	-0.22266	-0.19116	G1	7235982	941466	262405	477503	201558	257925	66237	86.99	313667	3.386	3.061
GM12878_cell_008	5753440	31002320	3.32863e+06	9587	12.69	4.04	0.36362	0.13628	S	8125174	1238709	341091	646803	250815	396327	89419	84.75	463045	11.177	5.65
GM12878_cell_009	5290690	20486098	2.53557e+06	8782	8.46	4.39	0.06965	0.38269	G2M	4941168	1213297	342443	665379	205475	407627	81335	75.45	443424	1.709	0.304
GM12878_cell_010	4830169	20688546	2.62892e+06	9823	12.94	5.99	0.22045	-0.10439	S	6232985	1071620	312161	545752	213707	338540	55627	82.81	399842	1.263	0.311
GM12878_cell_011	4584177	22003559	2.43826e+06	9537	11.77	6.31	0.14357	0.1795	G2M	4994922	1153713	321975	589896	241842	337407	71323	76.9	439939	0.972	0.156
GM12878_cell_012	4742611	21152901	2.71608e+06	9012	14.64	6.45	0.50937	-0.00066	S	4238884	767797	234295	385554	147948	234606	45228	81.89	240485	13.577	4.847
GM12878_cell_013	4589386	11834758	2.15886e+06	10326	22.97	6.07	-0.06911	-0.24517	G1	1062563	404150	127898	206497	69755	119491	28335	61.96	91742	20.911	12.001
GM12878_cell_014	5084526	10836707	2.13786e+06	9570	22.47	12.33	-0.25744	-0.29106	G1	1089055	330212	100489	161119	68604	82717	24673	69.68	66424	23.896	15.194
GM12878_cell_015	4262657	20884106	2.27078e+06	10182	11.68	6.59	0.16569	0.05888	S	1470736	491101	145444	266421	79236	162478	32400	66.61	137723	27.973	15.504
GM12878_cell_016	4719022	22240422	2.53072e+06	11018	10.7	7.35	0.0227	0.11541	G2M	477610	161875	46629	77514	37732	41070	10938	66.11	18905	58.458	53.933
GM12878_cell_017	3538681	14490052	1.54532e+06	11135	7.86	10.26	-0.26942	-0.1222	G1	1379090	397115	120599	196325	80191	101655	28120	71.2	95438	22.45	10.992
GM12878_cell_018	3575608	15921677	2.23839e+06	8440	12.7	5.16	-0.38122	-0.4111	G1	3314158	1173423	352297	535562	285564	324823	66681	64.59	474784	6.275	6.118
GM12878_cell_019	3603753	26635055	2.46524e+06	8162	13.71	6.12	0.01569	-0.43839	S	4426610	1374955	455547	681276	238132	407739	78056	68.94	547130	12.025	5.582
GM12878_cell_020	3917611	21209793	2.76061e+06	9180	11.75	4.99	0.40227	-0.2721	S	3728706	1377488	466229	689296	221963	456520	74919	63.06	483296	1.572	0.331
GM12878_cell_021	3669768	18831865	2.6117e+06	8407	18.37	5.13	0.44323	-0.23133	S	3704058	1188310	330405	598932	258973	361534	80561	67.92	455189	13.829	5.402
GM12878_cell_022	4172659	21684241	2.76709e+06	9469	13.01	6.08	0.37821	-0.259	S	4971027	1447847	458010	682032	307805	433316	69762	70.87	622855	4.662	4.566
GM12878_cell_023	4301600	25701736	3.05073e+06	9851	13.95	5.52	0.31409	-0.21604	S	4578470	1456161	508658	727895	219608	477748	69061	68.2	523730	1.807	0.433
GM12878_cell_024	3734176	21121563	2.45591e+06	8813	15.84	6.47	0.21627	-0.34411	S	3374123	971438	236924	485833	248681	266810	56860	71.21	360714	2.085	1.649
GM12878_cell_025	3872689	17974543	2.67243e+06	8401	15.32	4.83	-0.23124	-0.42479	G1	3638642	1083814	260953	448774	374087	226599	55808	70.21	494740	8.193	5.013
GM12878_cell_026	3278907	25790702	2.08116e+06	8562	13.92	5.91	-0.35012	-0.45249	G1	5086856	1552862	475118	708447	369297	434750	85680	69.47	634707	6.643	6.203
GM12878_cell_027	3062221	24938635	1.90871e+06	8467	13.8	3.1	-0.34525	-0.41023	G1	4816643	1249578	283460	641729	324389	312794	103821	74.06	496294	0.551	0.122
GM12878_cell_028	3233494	19364587	2.03163e+06	8813	8.63	5.12	-0.12357	-0.34679	G1	4294980	1436370	424354	711946	300070	459783	94225	66.56	573555	1.483	0.12
GM12878_cell_029	3069354	26844214	1.89991e+06	8259	14.09	6.63	-0.10828	-0.43775	G1	5110470	1515786	451207	746727	317852	390400	89032	70.34	624576	2.645	1.198
GM12878_cell_030	2915529	16389363	1.74868e+06	8180	18.38	5.33	-0.3622	-0.4432	G1	4078398	1191236	346079	549595	295562	330849	70134	70.79	480326	0.711	0.166
GM12878_cell_031	2927520	26057397	1.87889e+06	8847	9	6.16	-0.37106	-0.48045	G1	5524244	1641858	483499	805451	352908	488344	107025	70.28	633580	0.706	0.17
GM12878_cell_032	2854078	21920823	1.91489e+06	9481	12.08	5.99	0.39762	-0.09736	S	4638054	1523935	435410	772419	316106	464191	85838	67.14	634478	1.024	0.259
GM12878_cell_033	2411990	14693509	1.53939e+06	7710	19.24	8.18	-0.06242	-0.04134	G1	953286	530638	162356	301806	66476	193361	36097	44.34	156708	27.777	24.103
GM12878_cell_034	2542883	12262122	1.45441e+06	6464	20.59	9.17	-0.00304	-0.23958	G1	768441	343357	101369	193282	48706	109356	27755	55.32	86128	28.893	22.629
GM12878_cell_035	2508106	12974889	1.41381e+06	7874	11.73	7.76	-0.30485	0.32751	G2M	764859	373136	104171	205573	63392	128606	28906	51.22	115855	25.031	18.139
GM12878_cell_036	2234560	11411358	769109	7066	12.07	6.75	-0.31746	-0.31717	G1	1314675	409701	125861	202980	80860	114280	31607	68.84	127755	19.644	10.673
GM12878_cell_037	1629509	14482295	597339	9234	9.56	9.77	-0.0968	0.41739	G2M	773260	368079	117346	191933	58800	129393	21156	52.4	95176	29.934	23.856
GM12878_cell_038	1205807	13298598	248057	7702	8.03	3.05	-0.18059	0.20296	G2M	413637	206504	35615	142262	28627	59459	52942	50.08	33530	54.047	46.898
GM12878_cell_039	2248804	12528214	1.14485e+06	8966	10.41	7.3	0.01169	0.11438	G2M	647896	245373	69300	133562	42511	67565	22258	62.13	62666	34.554	28.059
GM12878_cell_040	2164993	13048260	901877	7432	6.94	6.55	0.13384	0.21851	G2M	986455	409517	102950	202672	103895	117366	27987	58.49	112004	18.701	10.44
GM12878_cell_041	2570006	11977590	1.3157e+06	7115	8.86	7.31	-0.21494	0.51521	G2M	701425	360276	101152	201475	57649	116270	27827	48.64	98385	30.577	20.41
GM12878_cell_042	2637177	9008759	1.21765e+06	9014	12.74	7.02	-0.10522	-0.28868	G1	622317	183176	43450	99602	40124	47870	17133	70.57	44803	34.76	28.918
GM12878_cell_043	4790470	29875689	3.05914e+06	6170	17.9	5.44	-0.20349	0.33832	G2M	3682879	1232385	368463	616654	247268	376496	104370	66.54	447999	6.15	3.007
GM12878_cell_044	5269967	2051758	3.30879e+06	7740	20.59	5.98	0.02573	-0.06103	S	230978	194937	61572	101530	31835	55728	15293	15.6	27160	56.364	52.226
GM12878_cell_045	5256181	1680801	3.08249e+06	6223	17.31	4.62	-0.03433	-0.31061	G1	146097	129913	41307	64626	23980	33727	10638	11.08	15765	58.936	56.182
GM12878_cell_046	4740909	2202365	2.99781e+06	6526	20.68	5.67	-0.20697	-0.22666	G1	217273	197079	46444	99926	50709	42679	17013	9.29	19890	57.787	53.586
GM12878_cell_047	5182564	2003259	3.0967e+06	7021	20.43	5.9	0.03689	-0.32816	S	200803	176869	54788	88866	33215	49174	14485	11.92	25405	51.65	46.478
GM12878_cell_048	4750802	29434714	2.47511e+06	6177	18.8	3.76	0.30852	-0.22864	S	3157213	743172	190835	359478	192859	182089	55081	76.46	277810	5.264	0.689
GM12878_cell_049	5264132	15272220	2.83342e+06	5869	19.72	6.84	0.10591	-0.22333	S	1369872	428814	131373	229018	68423	112093	37702	68.7	100951	32.439	28.619
GM12878_cell_050	4702621	11841507	2.64673e+06	6641	8.61	5.89	-0.32272	-0.35243	G1	1119884	404975	123057	212383	69535	117926	37283	63.84	103208	31.439	25.114
GM12878_cell_051	5251465	18566531	3.25195e+06	7244	13.86	5.49	0.15309	-0.22713	S	1634211	393774	131667	191543	70564	103364	32192	75.9	97744	27.55	21.228
GM12878_cell_052	4538526	24817030	2.67903e+06	5310	16.37	3.89	0.23423	0.04112	S	2916794	615355	190076	278647	146632	155489	40597	78.9	203123	6.445	0.973
GM12878_cell_053	3427362	38840538	2.09084e+06	8047	15.99	5.04	-0.18665	0.21591	G2M	3734838	787284	249654	411234	126396	249259	60632	78.92	229709	20.247	12.321
GM12878_cell_054	4062188	32086806	2.44185e+06	8241	15.94	5.21	-0.22835	0.20094	G2M	3248241	945796	242028	591534	112234	238584	227691	70.88	193450	12.664	6.585
GM12878_cell_055	3931094	30631239	2.19932e+06	5199	24.06	7.24	-0.1551	-0.29277	G1	3071892	663340	204739	325546	133055	175390	54411	78.41	224742	10.855	2.634
GM12878_cell_056	3531024	34759185	1.79746e+06	3543	22.31	4.13	-0.30794	-0.27336	G1	2788730	664052	187864	322027	154161	152477	54973	76.19	251117	10.286	3.878
GM12878_cell_057	4174866	5450378	2.53394e+06	7577	20.56	3.81	0.07508	0.09547	G2M	379057	257331	78978	138769	39584	85069	20573	32.11	49655	40.777	34.859
GM12878_cell_058	5513680	32268956	3.4156e+06	7216	15.2	4.61	-0.12596	0.18583	G2M	3484991	690675	222317	344951	123407	163978	61992	80.18	232318	22.887	12.065
GM12878_cell_059	4357182	20236791	2.39453e+06	7922	16.1	5.53	-0.11131	0.15076	G2M	2174306	430732	137896	224250	68586	103493	44875	80.19	100619	24.681	21.424
GM12878_cell_060	3959923	27939391	2.34016e+06	5681	26.45	4.93	-0.28404	-0.34768	G1	1944842	388862	127328	182883	78651	99887	29440	80.01	100432	30.581	25.746
GM12878_cell_061	3716619	16527460	2.11015e+06	6751	16.25	5.56	0.15973	-0.26102	S	1930072	527645	166899	253284	107462	135174	39099	72.66	162457	13.003	5.587
GM12878_cell_062	4453423	32439391	2.52569e+06	4611	19.43	6.32	-0.30877	-0.3307	G1	3314178	616214	200520	287968	127726	141946	42453	81.41	185677	7.639	2.465
GM12878_cell_063	4351559	9097994	1.99345e+06	4643	10.7	4.48	-0.26481	-0.24364	G1	771502	344980	97997	176064	70919	82487	30692	55.28	79855	31.6	19.615
GM12878_cell_064	5487887	4283314	3.1907e+06	6779	14.57	4.92	-0.24606	-0.26447	G1	413795	170392	51739	83308	35345	42167	13889	58.82	27539	50.63	45.385
GM12878_cell_065	5805838	20727617	3.28688e+06	7023	18.13	4.86	-0.21821	0.14528	G2M	1784113	257151	80106	133371	43674	61972	25395	85.59	39202	49.486	44.763
GM12878_cell_066	3868783	11869261	2.27565e+06	6405	20.95	6.19	-0.04645	-0.34063	G1	1237457	206113	62264	101940	41909	52166	16479	83.34	36343	48.257	41.653
GM12878_cell_067	4974313	20912582	2.84298e+06	7624	13.67	5.35	-0.13611	0.18367	G2M	2662101	442809	84758	248887	109164	81804	62792	83.37	105650	14.763	4.565
GM12878_cell_068	4652627	9516464	2.79918e+06	6240	19.36	4.21	-0.34458	-0.34603	G1	726051	280165	80851	146069	53245	75660	26623	61.41	61983	38.391	33.607
GM12878_cell_069	4997998	19065843	2.83968e+06	5622	21.3	5.77	0.07287	-0.22788	S	1491190	324753	97523	154574	72656	75829	26828	78.22	75514	26.13	19.766
GM12878_cell_070	4256187	29377668	2.68605e+06	5743	26.52	5.42	-0.08793	-0.30057	G1	2893299	556208	169901	276603	109704	140532	43526	80.78	165436	13.62	7.761
GM12878_cell_071	4314644	18854749	2421815	6319	13.28	5.51	-0.09306	-0.3728	G1	2325893	578628	165336	279537	133755	138344	44426	75.12	194643	4.854	1.796
GM12878_cell_072	4052812	30362709	2.50768e+06	6285	20.39	5.26	-0.00715	-0.37638	G1	2315524	519406	145137	266216	108053	124350	44938	77.57	167570	20.456	12.685
GM12878_cell_073	4393351	23794781	2.66584e+06	6341	21.25	4.36	-0.25907	0.21613	G2M	2894325	721056	191289	362926	166841	157844	68750	75.09	266546	0.957	0.274
GM12878_cell_074	4701078	23214582	2.82958e+06	7164	17.24	5.66	-0.27837	-0.27406	G1	2052983	471558	149866	218601	103091	111403	34586	77.03	134016	12.339	4.892
GM12878_cell_075	4906337	19441305	2.54262e+06	7452	16.67	4.75	-0.10898	-0.28914	G1	2153273	542857	157228	270492	115137	130920	51575	74.79	171933	3.077	0.952
GM12878_cell_076	6346448	16501439	4.01569e+06	7046	19.2	5.09	-0.08913	0.08729	G2M	1634223	550843	161683	300423	88737	176785	46515	66.29	176486	16.862	9.187
GM12878_cell_077	5952016	21195176	3.59892e+06	7184	19.5	4.73	0.15166	-0.19971	S	2490275	584130	188670	267997	127463	145371	42057	76.54	184561	18.035	9.34
GM12878_cell_078	4740732	13152241	2.51435e+06	5337	11.72	5.98	-0.31579	-0.38246	G1	2207937	520462	150043	256366	114053	128557	44795	76.43	157479	6.452	2.89
GM12878_cell_079	5830005	17033954	3.52348e+06	7932	14.95	6.14	0.08625	-0.28161	S	2691046	373520	91700	182192	99628	85389	31728	86.12	89220	17.039	7.425
GM12878_cell_080	3062934	25697175	1.71871e+06	6056	20.91	6.01	-0.219	0.21251	G2M	4295236	697023	201836	376339	118848	164406	63374	83.77	207459	8.752	3.547
GM12878_cell_081	5119059	17285706	3.60065e+06	8807	22.9	11.45	-0.14617	-0.02879	G1	2970635	1738658	508429	980744	249485	498255	160536	41.47	571375	2.169	0.67
GM12878_cell_082	4549473	20693415	2.92385e+06	7962	22.62	10.01	0.06232	0.08473	G2M	3092489	1687991	507378	952240	228373	636361	106928	45.42	599572	1.123	0.168
GM12878_cell_083	5110588	19608877	2.99041e+06	7717	24.06	7.48	-0.35272	-0.36788	G1	3340215	1325346	414271	677906	233169	417038	100216	60.32	508895	3.451	3.159
GM12878_cell_084	6068089	19750299	4.02765e+06	7785	23.12	10.49	-0.12446	0.07755	G2M	3699659	1828931	578493	1008878	241560	680495	129210	50.56	644205	1.259	0.101
GM12878_cell_085	5873924	26126105	3.88069e+06	9212	15.3	8.34	-0.04346	0.23575	G2M	3747192	1968244	626405	1070730	271109	740167	130833	47.47	665194	1.581	0.088
GM12878_cell_086	5773090	183863	3.57566e+06	6239	28.35	13.09	-0.12129	-0.35086	G1	7110	4404	1251	2322	831	1248	364	38.06	395	75.123	72.105
GM12878_cell_087	4959652	30744641	2.86182e+06	8067	16.29	9.45	0.06643	-0.00269	S	4153028	1613612	502030	849734	261848	516483	112066	61.15	599721	1.355	0.143
GM12878_cell_088	4728979	23163751	2.80722e+06	8923	13.66	7.19	0.15408	-0.06199	S	2724579	970540	278510	506357	185673	300056	69021	64.38	371207	2.675	0.302
GM12878_cell_089	4734513	14115006	3.06366e+06	8534	19.51	7.1	0.2865	0.00643	S	1330497	806505	243644	415639	147222	260666	54817	39.38	251619	2.324	0.424
GM12878_cell_090	4271283	20237272	2.52121e+06	7402	17.95	12.58	0.11436	-0.20223	S	2038835	1034115	316993	569540	147582	315511	76919	49.28	352349	1.639	0.231
GM12878_cell_091	5204865	15304790	3.02229e+06	8967	12.51	8.09	-0.08218	-0.14665	G1	2000307	1062603	315532	582696	164375	328470	81456	46.88	367115	2.259	0.389
GM12878_cell_092	5434480	17878112	3.32818e+06	7817	31.04	7.47	-0.33811	0.44068	G2M	1469938	977579	285393	546175	146011	370816	66981	33.5	312899	2.294	0.212
GM12878_cell_093	5316658	14369299	3.02629e+06	6884	22.49	11.3	-0.091	0.05929	G2M	2044793	1325200	343961	715270	265969	455618	95431	35.19	515451	1.733	0.125
GM12878_cell_094	5759316	16286090	3.41555e+06	8522	15.87	9.56	0.04645	-0.08013	S	1678959	1016742	308287	555530	152925	354311	64378	39.44	333582	16.627	8.852
GM12878_cell_095	5037092	13722561	3.02527e+06	7247	19.88	15.06	-0.29878	-0.26905	G1	1998010	988059	290413	537372	160274	311370	75527	50.55	368642	0.992	0.262
GM12878_cell_096	4494904	13090918	2.50194e+06	6715	24.62	13.96	0.0704	0.06273	S	1173025	748515	204107	413622	130786	258598	54055	36.19	247046	1.815	0.333
GM12878_cell_097	3002968	16320152	810135	8259	23.36	16.52	-0.14277	-0.05239	G1	2574870	1768699	343554	993318	431827	506059	166381	31.31	732546	1.068	0.071
GM12878_cell_098	3258521	22992871	855472	7695	29.32	12.95	0.11251	-0.22274	S	3069090	1901541	551691	1085803	264047	671124	138675	38.04	609942	14.119	9.828
GM12878_cell_099	3148616	14027109	762922	9100	11.83	14.31	-0.14389	0.00731	G2M	2025697	1144521	378616	644092	121813	336815	102200	43.5	367108	1.498	0.335
GM12878_cell_100	3434809	14714645	898463	8294	17.86	12.58	0.15597	-0.00794	S	2618785	1549708	414993	905704	229011	567423	108717	40.82	571034	0.754	0.082
GM12878_cell_101	5287260	22503165	1.15076e+06	8185	20.65	11.26	0.03633	-0.04277	S	3656110	1632696	466343	955165	211188	510821	128521	55.34	617805	4.915	4.729
GM12878_cell_102	2559514	18585142	492202	7503	14.06	11.76	-0.17973	0.41431	G2M	2585658	1630768	484197	932074	214497	592542	113203	36.93	556363	0.82	0.083
GM12878_cell_103	2799413	13982887	564826	8615	18.82	11.2	-0.03987	0.27793	G2M	2326528	1570395	521548	875459	173388	623079	93751	32.5	473958	1.451	0.168
GM12878_cell_104	2534053	14484182	453455	7984	14.19	12.64	0.12409	-0.35526	S	2195672	1200742	398543	613923	188276	376269	81970	45.31	401341	1.355	0.382
GM12878_cell_105	4632405	19224670	1.12254e+06	8549	15.12	13.14	-0.01493	-0.08483	G1	2774593	1643563	525474	920368	197721	623517	104774	40.76	541030	14.369	5.521
GM12878_cell_106	2752048	18730144	564296	7700	18.83	12.01	-0.092	-0.17541	G1	3290379	1498564	473645	843894	181025	476142	107615	54.46	521080	1.259	0.163
GM12878_cell_107	2311939	20104776	430336	6943	17.88	16.35	-0.27584	-0.35578	G1	2677580	1138478	315905	630475	192098	343391	95910	57.48	431133	1.691	0.148
GM12878_cell_108	2381138	17335385	479601	7863	13.14	11.62	-0.13177	-0.07996	G1	2570256	1254283	398488	685056	170739	417516	88451	51.2	415085	1.844	0.384
GM12878_cell_109	2581221	21556302	568581	7802	15.66	11.46	0.18452	-0.14401	S	2925464	1302056	392803	704408	204845	408821	94594	55.49	462265	1.396	0.213
GM12878_cell_110	3085721	24538465	739159	6119	26.49	16.18	-0.21755	-0.26469	G1	3355001	1407205	423833	793090	190282	425554	104416	58.06	472382	1.191	0.187
GM12878_cell_111	3823625	20265954	1.02206e+06	8426	21.58	11.97	0.02589	-0.19319	S	3311818	1407369	458572	743839	204958	461390	92255	57.5	475654	1.192	0.214
GM12878_cell_112	2886218	24458814	716468	9103	15.01	10.08	0.17659	-0.00616	S	3504576	1835553	599878	1018269	217406	683489	106680	47.62	617201	1.683	0.172
GM12878_cell_113	2877748	10973564	574825	7324	17.44	12.17	-0.21783	0.76777	G2M	1982845	1296039	358088	731895	206056	450191	101146	34.64	436895	4.641	4.339
GM12878_cell_114	3518084	15343292	2.53411e+06	8808	14.61	5.55	0.12191	-0.05966	S	3599206	1393551	457703	737991	197857	486494	80152	61.28	482899	1.438	0.244
GM12878_cell_115	3138072	16021302	2.2615e+06	8188	15.49	6.56	0.01977	0.25187	G2M	3404907	1257015	385194	694932	176889	443010	92180	63.08	437881	17.577	9.275
GM12878_cell_116	3197393	25009803	2.33517e+06	9388	9.09	7.69	-0.17061	-0.43951	G1	5197313	1496999	494467	720081	282451	428226	95213	71.2	443335	1.149	0.332
GM12878_cell_117	3382167	26566922	2.48288e+06	9360	15.99	6.83	-0.14324	0.23201	G2M	4794467	1600980	539433	836478	225069	585522	91734	66.61	514218	1.628	0.945
GM12878_cell_118	3359468	16118981	2.38963e+06	7959	16.45	5.2	-0.38126	-0.45381	G1	3692950	824491	271944	408859	143688	262670	48432	77.67	252401	10.754	3.282
GM12878_cell_119	3361998	24160435	2.32794e+06	8857	5.77	8.8	0.29102	-0.25211	S	3802673	1195919	323829	575300	296790	308475	86714	68.55	399688	12.797	9.47
GM12878_cell_120	3498048	15409090	2.56874e+06	8312	22.39	6.26	-0.36227	-0.4264	G1	3266016	884703	287943	440494	156266	289271	52392	72.91	263952	4.537	4.324
GM12878_cell_121	3007989	17989501	2.07752e+06	7073	14.83	7.15	-0.31135	0.24927	G2M	3667117	1301122	389921	750303	160898	396059	189867	64.52	418015	12.092	8.097
GM12878_cell_122	3136622	18746314	2.25526e+06	7897	11.13	6.71	0.23323	-0.15927	S	3535710	890202	268491	452941	168770	262034	62520	74.82	310781	1.303	0.387
GM12878_cell_123	3716960	17411784	2.30696e+06	7952	16.65	6.67	-0.31862	-0.39208	G1	3031134	810094	259964	411726	138404	255633	57203	73.27	238001	20.443	18.282
GM12878_cell_124	3555524	25107669	2.52596e+06	9190	14.68	7.5	0.17915	-0.11133	S	4472514	1294385	420555	684872	188958	437808	77012	71.06	461189	7.784	4.1
GM12878_cell_125	3734505	20900608	2.64011e+06	9593	15.74	5.62	-0.00481	0.34476	G2M	4408970	1391137	358652	755099	277386	451991	101471	68.45	552133	4.579	4.245
GM12878_cell_126	3590142	18112867	2.59181e+06	8531	21.67	4.75	0.23019	-0.11473	S	3642568	1058681	315666	554904	188111	351504	74971	70.94	361657	0.832	0.209
GM12878_cell_127	3585317	24179787	2.63695e+06	8702	16.55	7.38	0.05536	0.25255	G2M	3944432	1342029	358039	766379	217611	483666	111983	65.98	485183	2.035	0.324
GM12878_cell_128	3658575	21619471	2.61342e+06	8850	14.13	5.46	0.20666	-0.23166	S	4467262	1066305	355151	519219	191935	327085	65313	76.13	364593	1.485	0.313
GM12878_cell_129	3533733	26550657	2.59462e+06	8910	17.53	6.06	-0.06159	0.39804	G2M	4777106	1524656	494386	801368	228902	572106	86059	68.08	473657	13.39	7.285
GM12878_cell_130	3281227	14139383	1.83527e+06	10109	10.15	5.49	-0.05709	0.48998	G2M	3164037	869747	191805	398062	279880	224917	52883	72.51	396508	6.714	3.729
GM12878_cell_131	2714784	18045102	1.49225e+06	9102	10.65	6.04	0.16431	0.13581	S	3514837	1027528	246825	432894	347809	259657	46437	70.77	485234	7.137	4.312
GM12878_cell_132	2389309	16626843	1.11356e+06	8737	12.66	3.7	-0.36486	-0.3107	G1	3490467	949678	218279	434810	296589	218075	62127	72.79	411674	5.226	4.902
GM12878_cell_133	1880469	10896326	594352	6424	8.03	2.95	0.09402	-0.05238	S	2097561	450141	105596	191933	152612	98135	24232	78.54	154480	12.964	5.976
GM12878_cell_134	2143921	24603691	757330	6479	10.07	3.01	-0.11825	0.14588	G2M	3970812	1161548	292592	544429	324527	336376	66233	70.75	515217	10.231	1.831
GM12878_cell_135	3932633	18699804	2.56588e+06	9313	9.8	5.31	0.34323	-0.05374	S	2879080	599062	146982	257153	194927	151207	28470	79.19	202037	13.216	8.524
GM12878_cell_136	2130309	21160405	668377	6490	8.38	3.44	0.06434	0.2344	G2M	3660444	674814	178679	318212	177923	162399	44012	81.56	273648	19.26	10.588
GM12878_cell_137	1983745	13288203	584580	6733	5.2	5.67	-0.03987	0.30506	G2M	2470225	508424	113932	198677	195815	112542	23384	79.42	157255	15.13	10.347
GM12878_cell_138	4290570	26019810	2.53775e+06	9347	9.46	6.03	0.19136	-0.03131	S	4157188	752414	179266	349589	223559	171052	49014	81.9	331364	8.296	6.847
GM12878_cell_139	2035642	19014926	204994	3605	7.85	1.96	0.01926	0.10484	G2M	3469697	830081	231644	380133	218304	228022	47530	76.08	339261	4.278	0.525
GM12878_cell_140	2419224	18996231	998634	7561	6.93	4.69	0.1324	-0.07549	S	2569325	692062	195058	343533	153471	196759	43537	73.06	249943	18.037	9.745
GM12878_cell_141	2816692	12843004	647623	6312	10.04	3.56	0.12213	-0.07608	S	2354243	596343	164987	282641	148715	170686	32202	74.67	212619	5.337	2.714
GM12878_cell_142	2420767	17144667	343243	4437	5	0.72	-0.10419	0.23074	G2M	2895146	874217	237257	471487	165473	310618	57208	69.8	313423	9.328	4.431
GM12878_cell_143	2842280	19051744	1.02647e+06	7693	8.61	6.59	-0.11051	0.27422	G2M	2992974	964689	274632	530460	159597	346282	66038	67.77	314233	11.23	5.972
GM12878_cell_144	3893180	23505176	992040	7216	23.63	13.24	-0.06071	-0.2582	G1	4042638	1614638	474289	879956	260393	529847	131269	60.06	624378	0.783	0.498
GM12878_cell_145	4032150	17311451	1.08955e+06	8431	17.94	10.93	-0.19788	0.22757	G2M	2683717	1320433	413864	740669	165900	362289	124315	50.8	430218	4.043	3.973
GM12878_cell_146	3618282	20468969	867176	6678	30.61	11.82	-0.2336	-0.06295	G1	3132088	1391826	424371	813213	154242	402341	130704	55.56	489926	15.491	7.483
GM12878_cell_147	4102235	23554990	858069	6942	19.12	13.52	-0.30748	-0.39996	G1	3474796	1495859	470011	822537	203311	486397	112297	56.95	533812	14.048	8.305
GM12878_cell_148	2426807	20387954	418114	7181	24.07	11.66	-0.13346	0.22724	G2M	2517400	1522631	476145	888124	158362	604092	107638	39.52	447971	4.373	0.766
GM12878_cell_149	4198529	15498415	972567	7367	23.21	13.26	-0.03872	-0.19082	G1	2440348	1323489	408435	719459	195595	412346	102210	45.77	477142	0.804	0.26
GM12878_cell_150	4491430	13967994	1.00509e+06	7662	25.13	14.49	-0.20123	-0.22473	G1	2635895	1361239	376770	760095	224374	416978	126478	48.36	505193	4.717	4.585
GM12878_cell_151	3936209	24532110	1.04992e+06	7263	21.72	16.23	-0.07725	0.09224	G2M	3091007	1787881	562350	1010436	215095	662543	124892	42.16	610116	1.245	0.118
GM12878_cell_152	3222472	22988267	742233	6314	28.54	16.71	-0.21616	-0.31332	G1	3566386	1834545	561778	972573	300194	575577	144495	48.56	704459	18.705	11.864
GM12878_cell_153	3707812	38612	960159	7815	20.82	9.79	-0.13013	0.02369	G2M	4504	3914	1153	2305	456	1292	335	13.1	270	74.956	71.857
GM12878_cell_154	3580984	20413853	825046	7512	23.91	10.5	-0.08001	-0.23347	G1	3153689	1442344	405955	816740	219649	428547	122530	54.26	541982	13.013	4.231
GM12878_cell_155	3247859	18879281	835581	8228	17.31	13.18	0.12117	-0.17057	S	2321517	1264074	418885	717751	127438	434530	85757	45.55	398200	15.769	8.31
GM12878_cell_156	3993804	21713644	1.02988e+06	8985	14.45	11.32	0.16074	-0.09376	S	2993276	1595457	515327	840450	239680	541902	106788	46.7	542289	1.008	0.143
GM12878_cell_157	3908738	17878500	1.04133e+06	7935	22.66	15.84	-0.00336	-0.08016	G1	2129391	1112082	285044	616478	210560	367869	96668	47.77	411132	1.232	0.142
GM12878_cell_158	3586092	17229386	898217	7756	26.09	10.14	-0.10476	0.12704	G2M	2853918	1337712	410282	798014	129416	422408	130079	53.13	447658	16.755	7.788
GM12878_cell_159	4211153	19502436	973174	8120	19.99	6.35	-0.06322	0.25174	G2M	2787699	1623609	432687	976301	214621	614312	112761	41.76	591639	1.496	0.285
GM12878_cell_160	4395974	28197321	1.04489e+06	7021	33.56	9.71	0.08192	-0.08885	S	3940240	1612544	378274	964391	269879	572918	143833	59.07	638456	1.574	0.073
GM12878_cell_161	4839360	20105071	1.22942e+06	7854	24.5	13.01	0.12351	-0.15411	S	2381034	1098066	337728	598383	161955	383482	72756	53.88	393863	15.635	6.763
GM12878_cell_162	2927258	16358295	2.06395e+06	8979	10.66	4.59	-0.10946	0.52949	G2M	3350236	1306990	423346	652093	231551	423962	82822	60.99	450404	6.485	4.935
GM12878_cell_163	2815520	19096391	2.04476e+06	9137	13.73	4.15	-0.03305	0.45833	G2M	3333760	1283636	374260	726426	182950	481730	105688	61.5	424172	13.076	3.974
GM12878_cell_164	3207081	17998795	2.26531e+06	9838	10.11	4.24	-0.25384	0.37407	G2M	3711781	1547045	378036	1038127	130882	443725	388807	58.32	357165	13.274	8.863
GM12878_cell_165	2762531	17068281	2.0036e+06	7960	14.74	4.45	-0.16337	-0.44909	G1	3469867	856100	261482	413118	181500	234699	57698	75.33	301730	9.27	2.668
GM12878_cell_166	2813503	19256402	1.99497e+06	9541	13.04	4.61	0.13499	0.27024	G2M	4140062	1480310	455392	801921	222997	529890	79547	64.24	511326	0.895	0.298
GM12878_cell_167	2670944	22610933	1.96203e+06	8967	12.19	3.28	0.0067	0.31498	G2M	4159112	1435785	407857	781030	246898	494928	100847	65.48	520947	2.281	0.488
GM12878_cell_168	3039982	20716039	1.91322e+06	6904	17.81	3.36	-0.35891	-0.43989	G1	4567342	1261882	420834	631305	209743	382196	73926	72.37	457789	1.128	0.439
GM12878_cell_169	2983619	19560527	1.93011e+06	6900	10.35	2.43	-0.40253	-0.41602	G1	2892599	817991	232469	403109	182413	212507	64262	71.72	284160	18.58	15.103
GM12878_cell_170	3215885	26530400	2.32646e+06	8705	9.99	4.61	0.32599	0.00565	S	5112223	1094219	335298	538657	220264	355483	63067	78.6	361830	1.773	0.597
GM12878_cell_171	2831274	23173258	1.97678e+06	8713	16.35	5.46	-0.13057	0.09225	G2M	5052740	1567761	454124	795223	318414	530691	87777	68.97	577203	9.509	1.796
GM12878_cell_172	2706044	27523425	1.76344e+06	8189	8.49	4.43	-0.44437	-0.44475	G1	5613994	1091191	279265	532601	279325	272223	75257	80.56	418957	1.142	0.235
GM12878_cell_173	2915586	22955725	2.06353e+06	7900	14.86	5.48	-0.05423	-0.49473	G1	4387506	1119865	291664	547353	280848	295299	89226	74.48	423539	1.118	0.588
GM12878_cell_174	3116070	21027192	1.79014e+06	7392	18.37	2.18	-0.30699	-0.37729	G1	4892942	1840750	507016	810344	523390	407223	102595	62.38	739106	5.503	2.874
GM12878_cell_175	3435922	25893945	2.43759e+06	9335	9.94	4.72	0.06427	0.04749	S	4974004	1227877	395090	623133	209654	359700	75341	75.31	435122	6.186	5.305
GM12878_cell_176	3155350	15752619	2.02749e+06	7906	3.78	4.53	-0.36929	-0.45516	G1	3288707	738381	179933	338998	219450	184273	50634	77.55	270536	13.069	7.247
GM12878_cell_177	2978882	21613033	2.16948e+06	8745	21.41	5.5	0.38775	-0.10264	S	4341470	1712186	547776	900494	263916	564444	108329	60.56	552812	8.065	5.023
GM12878_cell_178	3073313	25551571	2.11727e+06	9058	18.66	5.2	-0.13542	0.15558	G2M	5536463	1532568	415439	977870	139259	493510	382837	72.32	367947	15.85	11.253
GM12878_cell_179	3225467	16101504	2.35423e+06	8983	19.51	5.65	0.04094	0.18386	G2M	3490328	996865	301022	610157	85686	351212	106596	71.44	291008	23.174	19.31
GM12878_cell_180	3038700	20906766	2.23857e+06	8144	15.59	5.69	-0.05087	0.03402	G2M	4177652	1279444	423781	667477	188186	475182	72590	69.37	398935	3.937	3.763
GM12878_cell_181	3391848	14459648	2.43858e+06	8603	14.92	6.55	0.21322	-0.0825	S	2900158	847312	282255	447308	117749	299485	45484	70.78	246283	1.911	0.647
GM12878_cell_182	3512399	22629549	2.5758e+06	8108	25.31	5.32	0.09447	0.00887	S	4910529	1468636	486819	790481	191336	571848	75615	70.09	425684	1.171	0.269
GM12878_cell_183	3212702	21501273	2.33756e+06	9412	19.09	5.38	-0.13695	0.33692	G2M	4307358	1933129	594418	1063893	274818	726583	124842	55.12	597488	10.694	7.7
GM12878_cell_184	3252141	20327027	2.28768e+06	7989	10.66	7.25	0.3355	-0.15123	S	3541941	1117818	283981	585521	248316	346517	85451	68.44	442224	1.255	0.122
GM12878_cell_185	3380846	16899341	2.34247e+06	7945	17.95	5.75	0.21906	-0.06648	S	3386705	1045801	303194	579151	163456	384403	77547	69.12	351968	16.107	9.569
GM12878_cell_186	3103961	20813615	1.87814e+06	7954	20.55	4.35	0.30903	0.07847	S	3694808	1212389	337389	668402	206598	419604	84951	67.19	450298	14.911	8.454
GM12878_cell_187	3651890	31745490	2.64346e+06	9745	13.57	4.5	0.03842	0.41465	G2M	6751148	2265479	616376	1472131	176972	805571	526528	66.44	685097	3.965	2.278
GM12878_cell_188	3227713	17256261	2.26945e+06	8505	17.96	6.12	0.0637	0.15666	G2M	2959429	934893	286787	514063	134043	301193	73443	68.41	291623	9.435	5.528
GM12878_cell_189	3638881	21772364	2.52861e+06	8141	16.47	4.59	0.29281	-0.19896	S	3788711	1081884	330637	580795	170452	351876	73641	71.44	356649	11.747	6.103
GM12878_cell_190	3674265	25178458	2.65965e+06	8528	19.18	5.95	-0.09389	0.24245	G2M	4366118	1427626	372614	839413	215599	541293	111559	67.3	504770	3.31	2.696
GM12878_cell_191	3263019	18555451	2.35315e+06	7940	15.08	4.54	0.40894	0.0781	S	2560898	812081	222672	443468	145941	294138	57829	68.29	265739	4.528	3.405
GM12878_cell_192	3377865	13458789	2.36077e+06	7514	18.96	7.08	-0.2144	-0.39871	G1	2373275	643218	181931	329905	131382	182675	48606	72.9	194252	1.495	0.357
GM12878_cell_193	2366642	17017387	896110	2293	8.57	0.05	-0.03402	-0.00904	G1	3308089	1102653	303760	600095	198798	381734	75624	66.67	405527	11.242	6.468
GM12878_cell_194	2734474	21526390	1.37796e+06	9377	7.8	4.94	-0.19903	0.44756	G2M	4791800	1301878	302053	677469	322356	432666	87796	72.83	564213	1.714	0.385
GM12878_cell_195	2880373	17183151	1.4876e+06	8727	8.29	5.97	0.20967	-0.09472	S	3231273	743021	171675	293676	277670	163134	37145	77.01	297925	11.799	3.182
GM12878_cell_196	1392695	24341848	408301	6246	6.91	3.77	0.16246	0.17672	G2M	5123016	1424155	313139	542306	568710	328853	67605	72.2	674097	7.841	3.265
GM12878_cell_197	3414708	21927649	1.40797e+06	9467	4.83	4.78	-0.17783	0.63472	G2M	4158652	1048364	256341	521289	270734	320782	62854	74.79	467703	7.62	2.752
GM12878_cell_198	1479362	28490968	75022.5	2543	10.02	1.84	-0.04022	-0.01808	G1	4443354	1026012	300500	495960	229552	313374	53963	76.91	360411	17.373	10.191
GM12878_cell_199	1855839	20451201	217695	4822	10.73	2.25	0.0651	-0.03069	S	3794144	920589	225714	376349	318526	219475	43250	75.74	373879	13.933	7.924
GM12878_cell_200	3714732	21605834	2.19643e+06	10062	12.26	7.08	0.25738	-0.17196	S	3788073	665731	148164	256119	261448	136392	36387	82.43	239428	10.876	6.409
GM12878_cell_201	1977611	13536463	85701.9	2826	6.24	0.68	-0.04451	-0.01785	G1	2782090	1162361	318350	605507	238504	392742	65585	58.22	449273	1.58	0.254
GM12878_cell_202	1299186	13562908	263921	6227	6.1	7.25	0.1522	8e-05	S	2907012	717996	189893	303454	224649	178839	34695	75.3	301579	17.034	8.158
GM12878_cell_203	4103459	16336118	2.25882e+06	10258	11.61	6.79	0.03001	0.34787	G2M	3674568	979418	244933	423530	310955	254601	42250	73.35	438960	6.208	5.926
GM12878_cell_204	2747997	11852886	876026	6940	9.93	13.38	-0.30375	-0.29886	G1	2836583	947691	259260	462902	225529	285259	61467	66.59	346762	14.661	12.213
GM12878_cell_205	2434448	8679273	1.02602e+06	8383	9.67	5.55	-0.07656	0.28026	G2M	2173249	666171	157297	303412	205462	189003	31967	69.35	244712	20.399	8.324
GM12878_cell_206	5786255	13924473	3.96071e+06	8532	24.8	9.52	-0.04157	-0.10999	G1	2324125	1505381	449952	878703	176726	603019	92580	35.23	480770	1.52	0.126
GM12878_cell_207	6410415	18978085	4.50931e+06	9894	22.51	11.13	0.06692	-0.13502	S	3961851	2785805	737903	1612585	435317	898830	265661	29.68	816562	3.132	1.361
GM12878_cell_208	6202617	14406222	4.20591e+06	8919	12.95	9.79	-0.07699	0.12843	G2M	2352888	1194192	251934	711017	231241	220529	198492	49.25	460952	1.094	0.131
GM12878_cell_209	5226803	16659005	3.41913e+06	7506	26.35	10.85	0.11536	-0.12233	S	2740467	1521627	494778	825984	200865	513132	99159	44.48	537843	2.478	2.32
GM12878_cell_210	5561753	13934212	3.56286e+06	9084	17.25	9.74	-0.02486	-0.16105	G1	2575162	1543823	486500	847413	209910	584556	89282	40.05	527454	14.717	5.013
GM12878_cell_211	6774535	17040900	4.10585e+06	6814	38.31	8.85	-0.16951	-0.01606	G1	3077361	1754149	539487	989853	224809	678428	115856	43	632194	1.422	0.115
GM12878_cell_212	5666278	15450060	3.31871e+06	7116	26.24	13.6	0.08352	-0.05481	S	2502751	1361233	424767	730344	206122	471311	91084	45.61	487197	0.858	0.164
GM12878_cell_213	5766036	20054096	3.41488e+06	7900	21.1	11.05	0.21121	-0.28197	S	4188424	1651129	509217	894956	246956	525340	111772	60.58	628790	13.801	6.774
GM12878_cell_214	6023540	14498729	4.06947e+06	7982	23.27	9.41	0.08601	-0.22027	S	1755153	1059391	354700	593101	111590	364275	74306	39.64	361494	14.629	2.301
GM12878_cell_215	4549772	17499307	2.84229e+06	7412	19.6	12.33	0.14528	-0.12429	S	1438208	771081	231665	425013	114403	264210	57063	46.39	241549	1.427	0.394
GM12878_cell_216	6376419	17723385	4.01805e+06	7815	29.56	8.79	0.01348	-0.22499	S	2554312	1425938	406711	798187	221040	500054	100304	44.18	522048	1.532	0.116
GM12878_cell_217	5558453	17125768	3.22906e+06	8120	23.44	11.57	-0.26089	0.51542	G2M	2508753	1756333	453377	1103851	199105	626440	287088	29.99	466878	10.321	4.801
GM12878_cell_218	5616255	15640321	3.53434e+06	8632	21.02	12.11	-0.13828	0.05064	G2M	1922280	1238495	352545	701772	184178	329641	112794	35.57	357393	1.606	0.537
GM12878_cell_219	6012780	19841149	3.64323e+06	7775	26.04	9.79	0.08779	-0.16274	S	2923854	1256166	366093	682194	207879	407966	99733	57.04	472831	1.136	0.172
GM12878_cell_220	5748356	17000846	3.54479e+06	6728	22.52	13.12	-0.28928	0.07195	G2M	2423507	1490744	386876	836605	267263	505720	134145	38.49	582553	3.197	2.91
GM12878_cell_221	4803791	17515615	2.00019e+06	7496	20.43	7.64	-0.30659	0.52939	G2M	2266951	1401665	409978	782691	208996	520522	98151	38.17	485505	1.517	0.157
eHAP_cell_001	4120836	19171650	3.04502e+06	7405	15.25	8.68	-0.03981	0.22344	G2M	3181187	1428534	372458	855863	200213	567855	99015	55.09	/	0.378	0.069
eHAP_cell_002	3149523	24128932	2.28086e+06	7803	10.1	11.28	0.06187	-0.0035	S	4131580	1566146	412983	906606	246557	506493	130555	62.09	/	1.479	1.124
eHAP_cell_003	3306154	26140773	2.38303e+06	7692	12.5	10.63	-0.03504	0.18873	G2M	4774602	1348104	378789	781049	188266	518031	108036	71.77	/	1.895	1.89
eHAP_cell_004	3108118	21157290	2.23484e+06	7698	16.59	10.5	0.09393	0.10177	G2M	2797270	992228	267383	582246	142599	378169	72965	64.53	/	0.311	0.262
eHAP_cell_005	3938047	19418087	2.84664e+06	9084	10.06	9.55	0.25253	0.00251	S	3112437	1203096	325161	708372	169563	404949	90361	61.35	/	9.967	7.767
eHAP_cell_006	3593635	19485569	2.42184e+06	9479	7.36	8.25	0.049	0.23664	G2M	3648582	1337108	351051	800843	185214	352399	180177	63.35	/	3.035	2.64
eHAP_cell_007	4516244	19420624	3.24545e+06	8773	11.75	8.45	0.20235	0.11922	S	3169476	1123025	292615	658962	171448	348733	97393	64.57	/	4.244	4.049
eHAP_cell_008	3758646	19841751	2.76772e+06	8855	8.63	8.61	0.0357	0.03867	G2M	2367385	1150998	296111	650645	204242	348820	95133	51.38	/	4.291	3.778
eHAP_cell_009	4152336	13184445	2.7361e+06	9442	5.67	9.13	0.00667	0.26036	G2M	1728096	1016452	222465	671056	122931	249316	216802	41.18	/	4.011	3.875
eHAP_cell_010	3878095	16543500	2.78166e+06	9063	11.33	9.37	0.0549	0.13309	G2M	2453116	1308474	342264	798533	167677	414554	130162	46.66	/	6.048	3.993
eHAP_cell_011	3933427	23201621	2.78011e+06	8917	6.86	8.1	-0.14797	0.4732	G2M	3657179	1584285	420614	975929	187742	622078	148345	56.68	/	0.121	0.018
eHAP_cell_012	3970897	17815360	2.94356e+06	8596	10.87	10.48	0.08904	0.02902	S	4252900	1945923	488329	1178710	278884	746798	150149	54.24	/	1.629	1.0
eHAP_cell_013	4584363	19288029	3.18553e+06	7858	8.6	9.91	0.15042	0.08271	S	3646373	1327733	339660	808203	179870	520105	98726	63.59	/	0.1	0.011
eHAP_cell_014	4106377	21203615	2.71285e+06	9456	6.72	9.65	0.13893	0.00189	S	4683421	1742412	479920	1018541	243951	582655	138753	62.8	/	6.46	5.182
eHAP_cell_015	3701266	24088571	2.59229e+06	8553	8.3	9.9	0.13534	0.32521	G2M	6284173	1475916	372101	859165	244650	549297	109105	76.51	/	7.574	2.443
eHAP_cell_016	3597346	24581456	2.35964e+06	8721	8.92	9.39	0.02795	0.2331	G2M	6583248	1022188	249942	598627	173619	260443	146437	84.47	/	8.919	8.674
eHAP_cell_017	3227981	18134906	2.3432e+06	7173	9.85	11.15	0.05586	0.07911	G2M	4196912	1529933	395893	936141	197899	604519	116998	63.55	/	1.609	1.554
eHAP_cell_018	2792986	26438272	2.01593e+06	8060	16.67	11.2	0.0507	-0.01898	S	5670654	1804883	480509	1081662	242712	589420	142927	68.17	/	4.505	3.479
eHAP_cell_019	2814730	19612985	2.00998e+06	8622	9.19	9.2	0.07503	0.23218	G2M	4387195	1650775	442876	995309	212590	681915	121290	62.37	/	0.166	0.061
eHAP_cell_020	2535328	23993691	1.82913e+06	7876	9.22	10.37	-0.06818	0.4151	G2M	4921142	1821410	450381	1115065	255964	712956	150881	62.99	/	0.505	0.324
eHAP_cell_021	3235397	22717958	2.02539e+06	7731	9.52	10.26	0.22362	0.00455	S	4829299	1290747	338079	763297	189371	477771	105865	73.27	/	0.132	0.02
eHAP_cell_022	3797946	25226743	2.66181e+06	8793	8.04	7.97	0.12046	0.40233	G2M	5176675	1800609	460541	1092420	247648	755953	125406	65.22	/	0.205	0.127
eHAP_cell_023	3871988	24050792	2.661e+06	7348	9.8	10.09	0.34145	0.02526	S	4723199	1334226	350952	802574	180700	488625	112233	71.75	/	2.888	0.967
eHAP_cell_024	4077449	17839599	2.7773e+06	7166	13.78	10.2	0.08437	-0.03292	S	4689509	1015655	250615	576727	188313	373366	74268	78.34	/	0.229	0.028
eHAP_cell_025	3445749	19877125	2.48912e+06	9238	6.93	8.77	0.11446	0.06769	S	4256190	2112553	566348	1235402	310803	789048	157200	50.37	/	8.551	5.684
eHAP_cell_026	2838015	23633603	1.88944e+06	6990	6.88	9.15	0.10445	-0.02844	S	5165179	1194994	307395	697986	189613	407984	98360	76.86	/	3.593	3.531
eHAP_cell_027	3560943	22900320	2.52745e+06	7196	9.67	8.86	0.1268	0.07539	S	3809008	1047276	281426	618421	147429	362985	85790	72.51	/	0.104	0.014
eHAP_cell_028	2979307	17608734	2.04688e+06	8991	5.34	9.79	0.2399	0.11046	S	4187550	1685655	453624	981779	250252	601320	133108	59.75	/	2.251	1.34
eHAP_cell_029	3200863	18574519	2.0088e+06	8919	5.2	8.52	-0.11675	0.37069	G2M	3660321	1415600	352811	847547	215242	551535	109452	61.33	/	0.112	0.038
eHAP_cell_030	3980262	22285700	2.70686e+06	8030	8.61	9.45	0.12895	-0.08687	S	4490021	1162600	308458	693199	160943	385771	98170	74.11	/	1.689	1.407
eHAP_cell_031	3320296	19262686	2.25659e+06	8492	7.37	11.13	0.29196	-0.03707	S	4772862	1528064	403676	870179	254209	516404	117607	67.98	/	5.125	3.947
eHAP_cell_032	3598331	23523088	2.58859e+06	9487	9.65	10.32	0.1849	0.03661	S	3977262	1992060	447197	1228167	316696	746303	173375	49.91	/	0.127	0.018
eHAP_cell_033	3030336	13609073	1.85395e+06	7536	6.68	11.1	-0.03737	-0.10551	G1	811135	304854	82046	178669	44139	119801	24544	62.42	/	0.78	0.133
eHAP_cell_034	2364063	12423686	721950	6234	4.91	9.87	0.15241	0.16179	G2M	605488	167897	40190	93635	34072	47391	16347	72.27	/	1.397	0.476
eHAP_cell_035	2591595	12507443	1.58596e+06	8792	5.52	8.3	0.22592	-0.06321	S	1241082	541227	171452	299884	69891	169690	39545	56.39	/	0.546	0.228
eHAP_cell_036	2788262	12987703	1.69177e+06	7651	10.67	12.15	0.14396	-0.02274	S	1143458	359859	104797	202234	52828	133046	26265	68.53	/	0.552	0.12
eHAP_cell_037	10224592	11785980	6.76292e+06	10821	5.55	8.5	0.16145	0.09055	S	773703	345071	102425	196871	45775	121581	27883	55.4	/	9.827	7.435
eHAP_cell_038	9443933	16042623	5.67831e+06	8474	6.67	9.32	0.18933	0.02196	S	1124494	304820	80091	176541	48188	107216	26252	72.89	/	0.646	0.132
eHAP_cell_039	9441827	10671322	5.54926e+06	9739	6.68	9.08	0.258	-0.03977	S	633703	296933	87147	168329	41457	98745	25114	53.14	/	4.831	4.728
eHAP_cell_040	10333092	13999168	6.20637e+06	9592	7.05	9.33	0.03557	0.03843	G2M	784239	254185	72795	138829	42561	75262	20711	67.59	/	12.561	10.171
eHAP_cell_041	10866495	12400889	6.23271e+06	8580	4.72	8.76	0.05343	0.10096	G2M	968912	206715	58137	110615	37963	63935	17935	78.67	/	10.633	4.262
eHAP_cell_042	11140288	9180082	6.60321e+06	11789	3.45	7.45	0.01329	0.26767	G2M	795354	203290	52376	115686	35228	48046	35126	74.44	/	16.387	14.427
K562_cell_001	1897785	12139916	1.06924e+06	6772	14.41	5.07	0.00495	0.03343	G2M	1304582	811720	231149	491382	89189	257165	101149	37.78	/	/	/
K562_cell_002	1591195	19732219	994123	7292	9.04	7.95	-0.08954	0.33417	G2M	1136357	863125	237634	527998	97493	381708	72865	24.04	/	/	/
K562_cell_003	1845598	19321578	1.0315e+06	8293	12.75	6.62	-0.08306	0.19716	G2M	2296588	1070872	294408	695571	80893	335575	299037	53.37	/	/	/
K562_cell_004	1740346	15466359	1.04345e+06	6585	9.25	6.21	0.02127	0.02004	S	1523551	913558	233911	564366	115281	307857	103684	40.04	/	/	/
K562_cell_005	1686898	16431426	968093	7293	12.35	6.15	0.05312	-0.01872	S	1435838	887700	256108	530187	101405	278919	126237	38.18	/	/	/
K562_cell_006	1875268	17370202	1.15716e+06	7258	12.19	6.54	0.17213	-0.18265	S	1450928	885001	217342	547216	120443	326446	91143	39	/	/	/
K562_cell_007	1367540	15418961	774944	6993	15.86	5.78	0.16743	-0.16204	S	918348	647268	186966	383483	76819	250480	58285	29.52	/	/	/
K562_cell_008	1318691	14181033	782857	7923	12.7	7.52	0.05547	-0.04863	S	949703	693242	197534	416511	79197	299090	48012	27	/	/	/
K562_cell_009	1708337	12539069	1.18386e+06	7038	16.65	6.04	0.15977	-0.11488	S	674313	488112	151904	285388	50820	202436	41371	27.61	/	/	/
K562_cell_010	1601930	14434332	962737	7040	16.09	6.15	0.16647	-0.17912	S	997855	671768	212140	386300	73328	259708	61327	32.68	/	/	/
K562_cell_011	1706648	13691683	1.19683e+06	7909	11.26	6.48	0.13855	-0.23144	S	693722	482477	150165	282611	49701	189389	42431	30.45	/	/	/
K562_cell_012	1592858	13423008	967902	6112	13.95	5.73	0.18918	-0.27302	S	935606	641016	179253	342085	119678	217005	54602	31.49	/	/	/
K562_cell_013	1721622	14475061	1.09847e+06	7091	13.82	5.97	0.09826	-0.23874	S	879456	593975	182753	346536	64686	225140	57815	32.46	/	/	/
K562_cell_014	1743283	16101859	1.09588e+06	7603	13.23	6.44	0.17764	-0.23219	S	1184493	753230	229897	443962	79371	297602	60675	36.41	/	/	/
K562_cell_015	1539002	15664728	1.0206e+06	7112	13.02	5.74	0.20191	-0.18559	S	759665	503130	147191	286070	69869	182780	45633	33.77	/	/	/
K562_cell_016	1539129	14197995	1.0049e+06	7260	13.01	5.74	0.07481	-0.19089	S	995303	654278	199723	385852	68703	231281	57903	34.26	/	/	/
K562_cell_017	1907156	15879141	1.29296e+06	8047	11.85	6.15	0.00845	-0.08866	S	887789	659912	203802	401899	54211	308549	43825	25.67	/	/	/
K562_cell_018	3031661	11323885	1.92357e+06	10148	13.33	10.61	-0.0255	-0.07655	G1	702853	272578	88945	140426	43207	74083	28254	61.22	/	/	/
K562_cell_019	2927678	14631454	1.84758e+06	10454	13.14	10.01	0.05048	-0.22303	S	493354	195719	56361	96209	43149	58688	15109	60.33	/	/	/
K562_cell_020	3100771	12390274	1.96042e+06	10303	12.48	9.21	0.02017	-0.16701	S	386929	187797	58965	98527	30305	58686	16529	51.46	/	/	/
K562_cell_021	2846332	14174599	1.78458e+06	10426	11.31	10.34	0.10464	-0.24884	S	518754	248780	69965	134788	44027	83964	22989	52.04	/	/	/
K562_cell_022	3096092	17075582	2.0107e+06	9806	14.67	10.27	-0.07833	-0.08981	G1	173945	51103	12867	23068	15168	14261	3474	70.62	/	/	/
K562_cell_023	3124185	12047225	2.04808e+06	8867	15.24	10.26	0.08404	-0.18169	S	593042	307478	95159	166603	45716	104524	26051	48.15	/	/	/
K562_cell_024	2171956	12585061	1.36217e+06	10340	15.32	11.78	-0.06151	0.06431	G2M	238700	150752	47021	79121	24610	54395	11221	36.84	/	/	/
K562_cell_025	2618891	13532712	1.66966e+06	9408	14.28	9.36	0.07977	-0.2743	S	570324	288360	93884	149507	44969	89862	25424	49.44	/	/	/
K562_cell_026	3119907	10751477	1.95639e+06	10491	10.13	10.08	0.10608	-0.17901	S	377733	153495	45543	75523	32429	47956	12669	59.36	/	/	/
K562_cell_027	3023500	13242742	1.9543e+06	9686	13.06	9.63	0.10774	-0.27367	S	697364	282243	84604	149229	48410	86583	26270	59.53	/	/	/
K562_cell_028	5509975	9935732	3.49487e+06	9879	13.14	11.27	0.02513	-0.18428	S	389003	172583	46671	90688	35224	48233	16740	55.63	/	/	/
K562_cell_029	3049794	12142668	1.78358e+06	10102	8.58	11.03	-0.08839	-0.05005	G1	621523	257278	65091	147653	44534	55094	42393	58.61	/	/	/
K562_cell_030	3387246	10094651	2.2154e+06	9455	13.95	9.25	0.14849	-0.25393	S	668877	327143	108328	174522	44293	108304	27822	51.09	/	/	/
K562_cell_031	3298685	13708227	2.08181e+06	10790	10.27	9.6	0.03848	-0.19352	S	686948	337529	101454	187801	48274	123314	32149	50.87	/	/	/
K562_cell_032	3048020	15474092	1.93011e+06	10447	10.85	10.41	0.05627	-0.15941	S	577035	312153	97501	170990	43662	112392	26634	45.9	/	/	/
K562_cell_033	3210036	12738365	2.00433e+06	11305	14.69	8.45	-0.05355	-0.08939	G1	567968	338406	65132	212689	60585	104997	50961	40.42	/	/	/
K562_cell_034	2660253	15812739	1.86205e+06	10091	13.48	10.29	-0.07157	-0.09651	G1	646152	326649	86395	192086	48168	124612	31025	49.45	/	/	/
K562_cell_035	2561602	12391925	1.533e+06	9821	10.77	9.1	-0.04977	0.07733	G2M	1143171	516842	142908	286144	87790	112867	67885	54.79	/	/	/
BJ_cell_001	1741075	16449021	1.11809e+06	6321	14.99	6.51	-0.43984	-0.40297	G1	720521	497437	145999	284332	67106	183764	41072	30.96	/	/	/
BJ_cell_002	1718984	17743695	1.07262e+06	5787	14.1	5.21	-0.13387	0.32027	G2M	1491064	413813	136674	212909	64230	129827	35144	72.25	/	/	/
BJ_cell_003	1825548	14585164	1.14277e+06	5633	14.77	5.26	-0.11963	0.29085	G2M	882812	475004	134801	281771	58432	161274	57104	46.19	/	/	/
BJ_cell_004	1810880	14622099	1.18748e+06	5830	16.17	5.8	-0.0681	0.17361	G2M	596802	425068	125745	254200	45123	191434	29338	28.78	/	/	/
BJ_cell_005	1781457	16200643	1.05235e+06	6003	19.74	6.29	-0.28417	-0.34093	G1	886598	473941	158243	257761	57937	189930	28626	46.54	/	/	/
BJ_cell_006	1694579	14603894	1.08869e+06	5249	14.56	6.11	-0.12292	0.25554	G2M	706460	407538	118856	241771	46911	151974	44213	42.31	/	/	/
BJ_cell_007	1666191	12003703	944656	5745	16.37	5.9	-0.02846	-0.08025	G1	618234	388892	123039	216539	49314	154810	29139	37.1	/	/	/
BJ_cell_008	1811547	13941061	977760	6075	14.93	6.63	-0.27802	-0.27915	G1	779963	455717	147120	251917	56680	181812	31256	41.57	/	/	/
BJ_cell_009	1559738	18081549	896719	5566	17.96	6.51	-0.43047	-0.27516	G1	892928	447879	141133	244320	62426	170292	31227	49.84	/	/	/
BJ_cell_010	1752226	16596656	981190	5849	14.92	5.62	-0.19971	0.21575	G2M	538594	378803	114931	214675	49197	160477	23655	29.67	/	/	/
BJ_cell_011	1523795	13657491	888990	6122	12.46	6.37	-0.00691	0.23447	G2M	533778	382907	113459	225991	43457	168243	25576	28.26	/	/	/
BJ_cell_012	1461324	15193095	809315	5386	16.39	7.49	-0.24883	-0.34404	G1	856496	516138	126572	253199	136367	146555	36144	39.74	/	/	/
BJ_cell_013	1556420	17765404	865939	4553	19.38	6.76	-0.33623	-0.34538	G1	674207	373693	119140	210481	44072	142384	26581	44.57	/	/	/
BJ_cell_014	1316412	15403275	683010	4010	22.05	8.11	-0.26067	-0.12045	G1	552748	330264	95758	185744	48762	120720	27335	40.25	/	/	/
BJ_cell_015	1282808	13444431	697919	3908	19.85	5.95	-0.05602	-0.28067	G1	351714	221533	69511	117893	34129	79029	17148	37.01	/	/	/
BJ_cell_016	2499869	11702019	1.49937e+06	7888	10.08	9.81	-0.12169	0.23212	G2M	307003	161450	42992	85217	33241	58565	11797	47.41	/	/	/
BJ_cell_017	2996944	12929810	1.94235e+06	9079	10.65	8.43	-0.18047	0.36438	G2M	311526	159369	46899	83119	29351	60218	10741	48.84	/	/	/
BJ_cell_018	3225956	13962090	1.83975e+06	6706	10.05	9.78	-0.27404	-0.27359	G1	259169	97566	20383	51101	26082	28894	10061	62.35	/	/	/
BJ_cell_019	3292693	11841258	1.99476e+06	6988	12.53	10	0.00798	-0.20226	S	260624	121260	32712	63917	24631	41526	9744	53.47	/	/	/
BJ_cell_020	3140383	14430410	1.95157e+06	7649	6.68	9.07	-0.33121	-0.35446	G1	441542	159895	43467	83626	32802	52448	14363	63.79	/	/	/
BJ_cell_021	3344309	10764870	2.23598e+06	10620	7.27	4.77	-0.18104	0.68791	G2M	752875	365648	77029	253362	35257	115220	106831	51.43	/	/	/
BJ_cell_022	2788878	12819840	1.7228e+06	7123	13.31	7.92	-0.11119	0.40404	G2M	220489	113055	29161	57572	26322	40225	7215	48.73	/	/	/
BJ_cell_023	2398319	14074521	1.52571e+06	8148	10.58	9.35	-0.42769	-0.38803	G1	220950	82348	21298	37921	23129	22480	6385	62.73	/	/	/
BJ_cell_024	2511537	11497838	1.48171e+06	6991	8.55	10	-0.02339	-0.17687	G1	235208	104310	29203	53496	21611	33063	8218	55.65	/	/	/
BJ_cell_025	2373956	11408760	1.58031e+06	10526	9.48	9.18	-0.25976	-0.36227	G1	291146	143593	35693	74100	33800	42802	12789	50.68	/	/	/
BJ_cell_026	2742167	9315863	1.81413e+06	9706	8.74	5.79	-0.39933	-0.27825	G1	390385	187901	58264	98292	31345	58945	15723	51.87	/	/	/
BJ_cell_027	2639050	12412043	1.69176e+06	9040	11.69	7.82	-0.03839	0.30051	G2M	412533	238851	69023	132339	37489	92873	18390	42.1	/	/	/
BJ_cell_028	2630956	11450397	1.63763e+06	7430	10.23	5.91	-0.19746	-0.34795	G1	286391	135912	39242	72077	24593	44774	11902	52.54	/	/	/
BJ_cell_029	2502320	12036381	1.52375e+06	7542	8.85	9.45	-0.03297	-0.00943	G1	431554	217167	59194	122121	35852	82229	17026	49.68	/	/	/
BJ_cell_030	2492902	11651618	1.609e+06	8291	10.08	8.88	-0.27003	-0.04426	G1	485422	215305	65415	113448	36442	66979	17204	55.65	/	/	/
BJ_cell_031	2331317	12602488	1.54091e+06	8911	9.59	6.59	-0.41105	-0.38594	G1	867441	285150	22796	109422	152932	36931	22971	67.13	/	/	/
K562_cell_036	4601921	25829523	3.61566e+06	10989	7.32	9.44	-0.0507	-0.00669	G1	4705004	1288150	221189	733883	333078	270757	306289	72.62	/	/	/
K562_cell_037	9285440	32269547	7.30351e+06	10922	10.15	8.02	0.09289	-0.1934	S	6214662	1067190	349536	558109	159545	342318	85405	82.83	/	/	/
K562_cell_038	5732063	29049657	4.44198e+06	10143	11.27	8.53	0.10397	-0.26911	S	5471011	1374092	470045	703416	200631	440199	110590	74.88	/	/	/
K562_cell_039	9293004	29197715	7.25308e+06	10371	11.93	7.98	0.04987	-0.05162	S	6007637	1177148	406064	601098	169986	337765	92096	80.41	/	/	/
K562_cell_040	5005684	29236200	3.83044e+06	9995	11.21	9.19	0.14466	-0.21495	S	247391	215842	77561	103222	35059	68331	13835	12.75	/	/	/
K562_cell_041	8038352	21287959	6.38422e+06	9191	15.76	7.8	0.09534	-0.2019	S	4140669	705459	245532	354047	105880	220589	53481	82.96	/	/	/
K562_cell_042	3649739	32612077	2.84227e+06	10456	14.18	7.8	0.01872	-0.13072	S	5653790	1547288	569610	807232	170446	559756	101993	72.63	/	/	/
K562_cell_043	6480079	27818120	5.17933e+06	10753	12.58	6.87	-0.00765	0.08637	G2M	4458407	1610342	583810	861860	164672	588273	115503	63.88	/	/	/
K562_cell_044	7629780	35324303	6.01825e+06	10273	12.46	6.78	0.18329	-0.23022	S	6846020	1376713	503654	699916	173143	449042	93962	79.89	/	/	/
K562_cell_045	557445	29461976	274918	8493	12.84	8.89	-0.0553	-0.06046	G1	5702004	1550978	557217	837018	156743	570065	105833	72.8	/	/	/
K562_cell_046	62307	20248850	5265.47	1450	17.55	7.2	0.04667	-0.15422	S	3975855	835767	301443	441400	92924	306723	58626	78.98	/	/	/
K562_cell_047	413621	20880794	187675	7107	16.05	9.8	0.06572	-0.26029	S	3961533	1099491	402120	562387	134984	365879	75312	72.25	/	/	/
K562_cell_048	3560001	21816146	2.80193e+06	10291	12.41	8.51	0.06887	-0.11739	S	4167599	1222391	411611	649202	161578	447303	81969	70.67	/	/	/
K562_cell_049	7223841	27422569	5.66104e+06	10116	13.22	7.38	0.16276	-0.23539	S	4384062	843795	312880	432695	98220	287837	57573	80.75	/	/	/
K562_cell_050	7585371	23095846	5.90383e+06	10153	12.05	7.25	0.11277	-0.14853	S	3975901	1523558	510901	819122	193535	571314	95615	61.68	/	/	/
K562_cell_051	6554435	26668777	5.03985e+06	11181	17.82	6.5	0.22478	-0.11143	S	4230181	1511085	542358	800257	168470	577926	89038	64.28	/	/	/
K562_cell_052	7996346	27231061	6.0353e+06	9483	12.46	6.35	-0.03958	0.08511	G2M	5393204	837006	271732	466413	98861	204417	134042	84.48	/	/	/
K562_cell_053	2787180	33011254	2.13979e+06	9467	13.93	8.28	0.07054	-0.28061	S	5938415	758775	249487	392270	117018	231506	56243	87.22	/	/	/
K562_cell_054	6836221	25911883	5.33062e+06	10240	14.31	6.53	0.16112	-0.26843	S	4899345	818755	278762	421824	118169	270695	60177	83.29	/	/	/
K562_cell_055	3399207	30975455	2.61561e+06	10168	14.7	8.44	0.02363	-0.13645	S	5762319	1217118	458624	651248	107246	473010	74821	78.88	/	/	/
K562_cell_056	2792196	32582073	2.1265e+06	10183	12.92	7.67	0.05391	-0.05831	S	5613773	1205777	445628	641267	118882	460717	73108	78.52	/	/	/
K562_cell_057	6112133	34737621	4.7443e+06	10461	12.28	6.18	0.20349	-0.0819	S	5937406	1227843	389689	677432	160722	467271	87652	79.32	/	/	/
K562_cell_058	5155533	29416561	3.94869e+06	11009	12.42	6.87	0.00566	-0.04883	S	5262979	1064616	277192	703902	83522	333890	309181	79.77	/	/	/
K562_cell_059	7380394	31383746	5.67836e+06	9047	15.58	7.49	0.06529	-0.23833	S	6146831	875749	298671	448474	128604	276009	69158	85.75	/	/	/
K562_cell_060	5142481	29587303	4.13341e+06	10381	9.61	6.93	-0.15822	0.23652	G2M	4709025	1090466	366442	601176	122848	417889	83815	76.84	/	/	/
K562_cell_061	3319425	33790863	2.6054e+06	9793	11	9.4	0.095	-0.15705	S	6409792	1276295	412816	677937	185542	455471	86834	80.09	/	/	/
K562_cell_062	2845517	32051982	2.06895e+06	9491	13.85	9.12	-0.11632	-0.08268	G1	6380643	859309	275988	446144	137177	253463	69296	86.53	/	/	/
K562_cell_063	86923	29841660	11572	2664	10	8.18	-0.00732	-0.11313	G1	6199896	756543	276691	403914	75938	236946	62964	87.8	/	/	/
BJ_cell_032	2316794	16711087	1.94112e+06	8130	11.42	4.49	-0.3972	-0.40386	G1	3717270	765141	263343	378614	123184	216169	57335	79.42	/	/	/
BJ_cell_032	2316794	16711087	1.94112e+06	8130	11.42	4.49	-0.3972	-0.40386	G1	3717270	765141	263343	378614	123184	216169	57335	79.42	/	/	/
BJ_cell_033	4269095	15039644	3.59227e+06	9553	12.67	4.61	-0.38518	-0.33507	G1	3002194	769465	239181	420021	110263	260602	69910	74.37	/	/	/
BJ_cell_033	4269095	15039644	3.59227e+06	9553	12.67	4.61	-0.38518	-0.33507	G1	3002194	769465	239181	420021	110263	260602	69910	74.37	/	/	/
BJ_cell_034	5122599	12679980	3.67248e+06	8979	11.1	4.86	-0.40066	-0.39191	G1	2289723	416539	139244	221939	55356	122941	38324	81.81	/	/	/
BJ_cell_034	5122599	12679980	3.67248e+06	8979	11.1	4.86	-0.40066	-0.39191	G1	2289723	416539	139244	221939	55356	122941	38324	81.81	/	/	/
BJ_cell_035	4332880	12261025	3.31624e+06	9417	8.34	6.49	0.04882	-0.09062	S	2146909	437361	142681	234035	60645	145245	37462	79.63	/	/	/
BJ_cell_035	4332880	12261025	3.31624e+06	9417	8.34	6.49	0.04882	-0.09062	S	2146909	437361	142681	234035	60645	145245	37462	79.63	/	/	/
BJ_cell_036	5512276	12132154	4.06157e+06	9634	8.75	5.43	-0.23768	-0.16704	G1	2206471	478691	166604	250829	61258	157815	37941	78.31	/	/	/
BJ_cell_036	5512276	12132154	4.06157e+06	9634	8.75	5.43	-0.23768	-0.16704	G1	2206471	478691	166604	250829	61258	157815	37941	78.31	/	/	/
BJ_cell_037	5661957	15912680	4.2716e+06	10000	8.72	4.63	-0.38254	-0.36868	G1	2916076	561067	190802	303571	66694	187993	47123	80.76	/	/	/
BJ_cell_037	5661957	15912680	4.2716e+06	10000	8.72	4.63	-0.38254	-0.36868	G1	2916076	561067	190802	303571	66694	187993	47123	80.76	/	/	/
BJ_cell_038	1704724	19053781	1.22058e+06	9037	7.65	7.57	-0.00589	-0.08561	G1	3242457	828143	264109	456745	107289	288228	69895	74.46	/	/	/
BJ_cell_038	1704724	19053781	1.22058e+06	9037	7.65	7.57	-0.00589	-0.08561	G1	3242457	828143	264109	456745	107289	288228	69895	74.46	/	/	/
BJ_cell_039	3192425	25047858	2.37961e+06	9078	8.02	6.36	-0.24788	-0.1408	G1	3732214	796748	268279	422558	105911	261875	69516	78.65	/	/	/
BJ_cell_039	3192425	25047858	2.37961e+06	9078	8.02	6.36	-0.24788	-0.1408	G1	3732214	796748	268279	422558	105911	261875	69516	78.65	/	/	/
BJ_cell_040	1538907	18443261	1.2095e+06	8574	10.13	6.9	-0.34955	-0.37108	G1	2819522	625234	203969	338126	83139	209015	52645	77.82	/	/	/
BJ_cell_040	1538907	18443261	1.2095e+06	8574	10.13	6.9	-0.34955	-0.37108	G1	2819522	625234	203969	338126	83139	209015	52645	77.82	/	/	/
BJ_cell_041	5464014	22518408	4.12235e+06	9203	7.13	5.32	-0.17633	0.27685	G2M	3530031	766430	261204	395784	109442	229215	66440	78.29	/	/	/
BJ_cell_041	5464014	22518408	4.12235e+06	9203	7.13	5.32	-0.17633	0.27685	G2M	3530031	766430	261204	395784	109442	229215	66440	78.29	/	/	/
BJ_cell_042	4559913	19967146	3.47425e+06	9435	6.59	4.96	0.3376	-0.02417	S	3011157	810232	212395	464977	132860	285612	79181	73.09	/	/	/
BJ_cell_042	4559913	19967146	3.47425e+06	9435	6.59	4.96	0.3376	-0.02417	S	3011157	810232	212395	464977	132860	285612	79181	73.09	/	/	/
BJ_cell_043	4769066	17455424	3.62005e+06	11120	7.99	4.51	-0.13504	0.62581	G2M	2801377	1098755	259314	778363	61078	344792	367170	60.78	/	/	/
BJ_cell_043	4769066	17455424	3.62005e+06	11120	7.99	4.51	-0.13504	0.62581	G2M	2801377	1098755	259314	778363	61078	344792	367170	60.78	/	/	/
BJ_cell_044	4194389	18712485	3.173e+06	9408	8.46	6.13	-0.38642	-0.27478	G1	2948340	733118	239221	389370	104527	237461	59820	75.13	/	/	/
BJ_cell_044	4194389	18712485	3.173e+06	9408	8.46	6.13	-0.38642	-0.27478	G1	2948340	733118	239221	389370	104527	237461	59820	75.13	/	/	/
BJ_cell_045	4928325	18430477	3.795e+06	9742	7.89	5.6	-0.10517	0.46564	G2M	1779379	777705	233935	459192	84578	300866	73953	56.29	/	/	/
BJ_cell_045	4928325	18430477	3.795e+06	9742	7.89	5.6	-0.10517	0.46564	G2M	1779379	777705	233935	459192	84578	300866	73953	56.29	/	/	/
BJ_cell_046	2689979	27219092	2.00769e+06	8967	9.02	6.92	-0.348	-0.30912	G1	4265726	716181	245087	363597	107497	222451	58728	83.21	/	/	/
BJ_cell_046	2689979	27219092	2.00769e+06	8967	9.02	6.92	-0.348	-0.30912	G1	4265726	716181	245087	363597	107497	222451	58728	83.21	/	/	/
BJ_cell_047	4272766	31849605	3.3595e+06	10881	8.07	5.35	-0.14919	0.56151	G2M	4012206	1510812	444452	685051	381309	432260	99509	62.34	/	/	/
BJ_cell_047	4272766	31849605	3.3595e+06	10881	8.07	5.35	-0.14919	0.56151	G2M	4012206	1510812	444452	685051	381309	432260	99509	62.34	/	/	/
BJ_cell_048	5570627	32393034	4.24973e+06	9670	6.71	6.13	-0.04416	-0.01138	G1	5136055	834269	279976	447512	106781	257686	68771	83.76	/	/	/
BJ_cell_048	5570627	32393034	4.24973e+06	9670	6.71	6.13	-0.04416	-0.01138	G1	5136055	834269	279976	447512	106781	257686	68771	83.76	/	/	/
BJ_cell_049	4722999	30891850	3.50344e+06	8769	6.44	6.65	-0.17993	-0.03424	G1	4953482	688446	226907	349484	112055	199860	59036	86.1	/	/	/
BJ_cell_049	4722999	30891850	3.50344e+06	8769	6.44	6.65	-0.17993	-0.03424	G1	4953482	688446	226907	349484	112055	199860	59036	86.1	/	/	/
BJ_cell_050	5782130	18650001	4.34513e+06	9670	7.57	5.85	-0.38226	-0.27386	G1	2903797	423095	136275	223178	63642	134495	35047	85.43	/	/	/
BJ_cell_050	5782130	18650001	4.34513e+06	9670	7.57	5.85	-0.38226	-0.27386	G1	2903797	423095	136275	223178	63642	134495	35047	85.43	/	/	/
BJ_cell_051	2616322	20910804	1.94249e+06	9575	6.54	6.93	0.02119	-0.05498	S	3170782	497548	140615	281618	75315	156208	52858	84.31	/	/	/
BJ_cell_051	2616322	20910804	1.94249e+06	9575	6.54	6.93	0.02119	-0.05498	S	3170782	497548	140615	281618	75315	156208	52858	84.31	/	/	/
BJ_cell_052	3375218	27693460	2.43406e+06	9242	7.11	6.83	-0.34085	-0.28101	G1	3475647	479255	144507	258013	76735	146381	43161	86.21	/	/	/
BJ_cell_052	3375218	27693460	2.43406e+06	9242	7.11	6.83	-0.34085	-0.28101	G1	3475647	479255	144507	258013	76735	146381	43161	86.21	/	/	/
BJ_cell_053	4860752	22094283	3.71605e+06	9770	8	6.61	-0.29764	-0.25741	G1	3113069	599601	193866	296021	109714	166149	50676	80.74	/	/	/
BJ_cell_053	4860752	22094283	3.71605e+06	9770	8	6.61	-0.29764	-0.25741	G1	3113069	599601	193866	296021	109714	166149	50676	80.74	/	/	/
BJ_cell_054	5274801	24655583	4.05101e+06	10117	9.1	6.13	0.06535	0.13153	G2M	4524199	1070186	333545	595978	140663	374675	85350	76.35	/	/	/
BJ_cell_054	5274801	24655583	4.05101e+06	10117	9.1	6.13	0.06535	0.13153	G2M	4524199	1070186	333545	595978	140663	374675	85350	76.35	/	/	/
BJ_cell_055	3617108	23041993	2.66831e+06	8589	7.25	6.71	-0.32766	-0.28712	G1	3455951	634607	202914	333435	98258	192788	58643	81.64	/	/	/
BJ_cell_055	3617108	23041993	2.66831e+06	8589	7.25	6.71	-0.32766	-0.28712	G1	3455951	634607	202914	333435	98258	192788	58643	81.64	/	/	/
BJ_cell_056	4153707	25216489	3.32875e+06	8608	10.57	6.23	-0.41134	-0.38045	G1	4156970	604410	211300	308981	84129	182000	49563	85.46	/	/	/
BJ_cell_056	4153707	25216489	3.32875e+06	8608	10.57	6.23	-0.41134	-0.38045	G1	4156970	604410	211300	308981	84129	182000	49563	85.46	/	/	/
BJ_cell_057	4257690	19954580	3.10654e+06	8458	8.56	5.46	-0.1132	-0.03457	G1	2779070	490058	163060	256494	70504	148266	40103	82.37	/	/	/
BJ_cell_057	4257690	19954580	3.10654e+06	8458	8.56	5.46	-0.1132	-0.03457	G1	2779070	490058	163060	256494	70504	148266	40103	82.37	/	/	/
BJ_cell_058	4755071	30426364	3.57513e+06	9289	9.21	5.72	-0.32994	-0.32727	G1	4841467	629223	229385	323032	76806	199760	50592	87	/	/	/
BJ_cell_058	4755071	30426364	3.57513e+06	9289	9.21	5.72	-0.32994	-0.32727	G1	4841467	629223	229385	323032	76806	199760	50592	87	/	/	/
BJ_cell_059	5966056	24800236	4.55116e+06	9353	8.91	4.53	-0.03617	0.37041	G2M	3596812	667911	211933	379619	76359	249780	54963	81.43	/	/	/
BJ_cell_059	5966056	24800236	4.55116e+06	9353	8.91	4.53	-0.03617	0.37041	G2M	3596812	667911	211933	379619	76359	249780	54963	81.43	/	/	/
BJ_cell_060	4789841	21358474	3.63783e+06	10794	8.51	6.63	-0.16321	-0.25139	G1	3168289	776650	275509	382325	118816	229318	61493	75.49	/	/	/
BJ_cell_060	4789841	21358474	3.63783e+06	10794	8.51	6.63	-0.16321	-0.25139	G1	3168289	776650	275509	382325	118816	229318	61493	75.49	/	/	/
BJ_cell_061	5041483	19802605	3.81507e+06	10105	7.74	5.31	0.02419	-0.22725	S	3146948	471852	140851	257476	73525	154179	40728	85.01	/	/	/
BJ_cell_061	5041483	19802605	3.81507e+06	10105	7.74	5.31	0.02419	-0.22725	S	3146948	471852	140851	257476	73525	154179	40728	85.01	/	/	/
BJ_cell_062	4471188	17103462	3.33878e+06	9943	8.33	5.86	-0.19595	-0.28493	G1	2522444	516163	183268	265307	67588	168180	36644	79.54	/	/	/
BJ_cell_062	4471188	17103462	3.33878e+06	9943	8.33	5.86	-0.19595	-0.28493	G1	2522444	516163	183268	265307	67588	168180	36644	79.54	/	/	/
BJ_cell_063	1796433	23544697	1.30044e+06	9630	9.56	5.61	-0.07294	0.35737	G2M	3373645	1044122	356158	574549	113415	391601	76694	69.05	/	/	/
BJ_cell_063	1796433	23544697	1.30044e+06	9630	9.56	5.61	-0.07294	0.35737	G2M	3373645	1044122	356158	574549	113415	391601	76694	69.05	/	/	/
