# Supplementary material for: Simultaneous single-cell three-dimensional genome and gene expression profiling Uncovers Dynamic Enhancer Connectivity Underlying Olfactory Receptor Choice
Source: Research Square preprint supplement (doi:10.21203/rs.3.rs-3210240/v1), 2023-08-03
Supplement: Supplementary file 3 [file b042facfb27f1f6b5d792924.xlsx]

## Sheet: multi-genic activation stage
Cell	gene_name	FPKM	aCount	bCount	n_variants	homolog	Cluster	or_type	rank			note
p003-bdf1_038	Olfr223	111.2	TRUE	chr11	59588497	59593289	0	0	0	1	unknown
p003-bdf1_038	Olfr1377	98.87	TRUE	chr11	50981967	50986593	0	0	0	1	unknown
p003-bdf1_038	Olfr258-ps1	90.21	TRUE	chr1	174140408	174143254	85	0	16	1	DBA2
p003-bdf1_038	Olfr974	64.59	TRUE	chr9	39937501	39945170	0	0	0	1	unknown
p003-bdf1_038	Olfr110	60.1	TRUE	chr17	37492468	37500207	0	73	3	1	B6
p003-bdf1_038	Olfr985	57.59	TRUE	chr9	40126308	40130184	0	69	2	1	B6
p003-bdf1_038	Olfr718-ps1	46.74	TRUE	chr5	143134014	143147581	1	19	1	1	B6
p003-bdf1_038	Olfr1513	36.3	TRUE	chr14	52347495	52356408	1	82	18	1	B6
p003-bdf1_038	Olfr1361	35.42	TRUE	chr13	21656880	21663386	0	38	3	1	B6
p003-bdf1_038	Olfr877	15.85	TRUE	chr9	37854269	37857320	11	65	5	1	B6
p003-bdf1_038	Olfr284	13.12	TRUE	chr15	98340022	98340987	0	0	0	1	B6
p003-bdf1_041	Olfr171	97.68	TRUE	chr16	19623930	19629916	0	0	0	1	unknown	OR interaction is too strong, excluded for stats
p003-bdf1_041	Olfr2	95.44	TRUE	chr7	106995399	107006072	21	0	6	1	DBA2
p003-bdf1_041	Olfr1468-ps1	89.48	TRUE	chr19	13371854	13376066	0	67	2	1	B6
p003-bdf1_041	Olfr711	87.46	TRUE	chr7	106969694	106975453	209	0	6	1	DBA2
p003-bdf1_041	Olfr1372-ps1	41.73	TRUE	chr11	52154722	52168159	0	0	0	1	unknown
p003-bdf1_041	Olfr1417	23.03	TRUE	chr19	11826803	11839219	0	0	0	1	unknown
p003-bdf1_041	Olfr746	16.78	TRUE	chr14	50647083	50654183	0	255	13	1	B6
p007-bc_006	Olfr1031	390.93	TRUE	chr2	85990304	85993704	0	0	0	1	B6
p007-bc_006	Olfr63	102.97	TRUE	chr17	33264676	33275644	0	0	0	1	unknown
p007-bc_006	Olfr209	85.25	TRUE	chr16	59361160	59363993	0	0	0	1	B6
p007-bc_006	Olfr875	70.68	TRUE	chr9	37771857	37774459	161	0	6	1	CAST
p007-bc_006	Olfr437	70.25	TRUE	chr6	43163282	43169861	215	0	27	1	CAST
p007-bc_006	Olfr281	60.22	TRUE	chr15	98452588	98460395	1	208	16	1	B6
p007-bc_006	Olfr420	55.62	TRUE	chr1	174155633	174162195	0	137	8	1	B6
p007-bc_006	Olfr1364	51.38	TRUE	chr13	21571813	21581759	42	0	4	1	CAST
p007-bc_006	Olfr49	30.34	TRUE	chr14	54278253	54284939	139	0	13	1	CAST
p007-bc_006	Olfr448	20.18	TRUE	chr6	42890441	42899085	1	190	35	1	B6
p007-bc_009	Olfr1504	82.53	TRUE	chr19	13886920	13897928	181	0	19	1	CAST
p007-bc_009	Olfr183	82.5	TRUE	chr16	58995357	59001441	42	0	1	1	CAST
p007-bc_014	Olfr513	226.11	TRUE	chr7	108750973	108756800	389	0	12	1	CAST
p007-bc_014	Olfr816	57.6	TRUE	chr10	129909163	129915597	0	185	8	0	CAST
p007-bc_014	Olfr1188	41.65	TRUE	chr2	88556935	88560815	0	0	0	1	unknown
p007-bc_015	Olfr513	179.49	TRUE	chr7	108750973	108756800	508	0	17	1	CAST
p007-bc_015	Olfr1301	171.23	TRUE	chr2	111751006	111758852	0	190	2	1	B6
p007-bc_015	Olfr419	56.45	TRUE	chr1	174248514	174252061	0	166	16	1	B6
p007-bc_015	Olfr805	48.63	TRUE	chr10	129721221	129729375	0	156	15	1	B6
p007-bc_015	Olfr96	39.5	TRUE	chr17	37220146	37226673	0	134	9	1	B6
p007-bc_015	Olfr923	22.15	TRUE	chr9	38826545	38830300	0	49	5	1	B6
p007-bc_019	Olfr180	126.63	TRUE	chr16	58914285	58929392	1	0	1	1	CAST
p007-bc_019	Olfr1260	105.94	TRUE	chr2	89974340	89981586	0	0	0	1	unknown
p007-bc_019	Olfr672	72.19	TRUE	chr7	104995760	105002029	0	47	3	1	B6
p007-bc_019	Olfr418	68.44	TRUE	chr1	173266001	173273994	14	0	5	1	CAST
p007-bc_019	Olfr1491	59.64	TRUE	chr19	13697268	13706127	0	140	6	1	B6
p007-bc_019	Olfr171	58.81	TRUE	chr16	19623930	19629916	83	0	3	0	CAST
p007-bc_019	Olfr638	58.42	TRUE	chr7	103998746	104004357	0	104	12	1	B6
p007-bc_019	Olfr220	48.84	TRUE	chr1	174442082	174451277	83	0	8	1	CAST
p007-bc_019	Olfr683	34.26	TRUE	chr7	105140839	105147012	0	42	5	1	B6
p007-bc_019	Olfr164	31.14	TRUE	chr16	19284104	19314064	0	25	4	1	B6
p007-bc_019	Olfr457	17.78	TRUE	chr6	42468015	42476335	49	0	20	1	CAST
p007-bdf1_010	Olfr1507	1042.63	TRUE	chr14	52488791	52495749	9	1783	16	1	B6
p007-bdf1_010	Olfr1508	887.57	TRUE	chr14	52458829	52467495	1950	3	22	1	DBA2
p007-bdf1_021	Olfr508	442.57	TRUE	chr7	108629994	108631628	0	0	0	1	unknown
p007-bdf1_021	Olfr1100	240.69	TRUE	chr2	86976029	86979954	0	2	1	1	B6
p007-bdf1_045	Olfr1143	893.28	TRUE	chr2	87800592	87804274	359	0	3	1	DBA2
p007-bdf1_045	Olfr1144-ps1	365.63	TRUE	chr2	87808344	87808671	71	0	1	1	DBA2
p007-bdf1_045	Olfr527	57.78	TRUE	chr7	140334017	140338551	0	0	0	1	unknown
p007-bdf1_045	Olfr31	42.02	TRUE	chr14	14322828	14331791	72	0	12	1	DBA2
p007-bdf1_053	Olfr513	105.86	TRUE	chr7	108750973	108756800	0	0	0	1	unknown	all allele is unknown, excluded for stats
p007-bdf1_053	Olfr1377	69.31	TRUE	chr11	50981967	50986593	0	0	0	1	unknown
p007-bdf1_053	Olfr258-ps1	66.34	TRUE	chr1	174140408	174143254	0	95	19	1	B6
p007-bdf1_055	Olfr151	261.71	TRUE	chr9	37729977	37731104	0	0	0	1	DBA2	Olfr151 doesn't exist for this cell, excluded for stats
p007-bdf1_055	Olfr1310	163.27	TRUE	chr2	112004574	112012708	0	0	0	1	unknown
p007-bdf1_056	Olfr796	133.08	TRUE	chr10	129605492	129612570	0	0	0	1	unknown	all allele is unknown, excluded for stats
p007-bdf1_056	Olfr813	66.54	TRUE	chr10	129855367	129858722	0	0	0	1	unknown
p007-bdf1_056	Olfr1391	46.47	TRUE	chr11	49322742	49329810	0	0	0	1	unknown
p007-bdf1_058	Olfr139	317.1	TRUE	chr11	74044033	74056551	0	0	0	1	unknown
p007-bdf1_058	Olfr1079	156.42	TRUE	chr2	86536949	86542480	0	0	0	1	unknown
p007-bdf1_058	Olfr948	130.16	TRUE	chr9	39315712	39326045	0	0	0	1	unknown
p007-bdf1_058	Olfr467	129.67	TRUE	chr7	107812263	107816336	0	0	0	1	unknown
p007-bdf1_058	Olfr1233	116.05	TRUE	chr2	89333208	89342398	33	0	1	1	DBA2
p007-bdf1_058	Olfr197	115.63	TRUE	chr16	59185219	59189928	0	101	2	1	B6
p007-bdf1_058	Olfr223	107.21	TRUE	chr11	59588497	59593289	0	0	0	1	unknown
p007-bdf1_058	Olfr446	79.1	TRUE	chr6	42921377	42931141	0	0	0	1	unknown
p007-bdf1_058	Olfr1464-ps1	71.23	TRUE	chr19	13282134	13283056	0	0	0	1	B6
p007-bdf1_058	Olfr860	67.55	TRUE	chr9	19845156	19849747	0	0	0	1	unknown
p007-bdf1_058	Olfr1105	54.84	TRUE	chr2	87031260	87036531	0	162	10	1	B6
p007-bdf1_058	Olfr11	47.29	TRUE	chr13	21636623	21642518	30	0	2	1	DBA2
p007-bdf1_058	Olfr267	20.78	TRUE	chr4	58782704	58787716	26	75	25	1	B6
p007-bdf1_058	Olfr937	20.69	TRUE	chr9	39058851	39064951	0	0	0	1	unknown
p007-bdf1_058	Olfr1494	18.89	TRUE	chr19	13739728	13750479	0	3	1	1	B6
p007-bdf1_059	Olfr1106	186.91	TRUE	chr2	87046811	87052273	169	1	3	1	DBA2
p007-bdf1_059	Olfr1496	170.45	TRUE	chr19	13777878	13782920	2	211	7	1	B6
p007-bdf1_059	Olfr1010	89.02	TRUE	chr2	85748352	85754526	0	190	14	1	B6
p007-bdf1_059	Olfr105-ps	44.13	TRUE	chr17	37379033	37386208	244	1	20	1	DBA2
p007-bdf1_064	Olfr726	61.95	TRUE	chr14	50083570	50090953	38	0	1	0	DBA2
p007-bdf1_064	Olfr1112	57.62	TRUE	chr2	87187798	87192767	0	50	1	1	B6
p007-bdf1_064	Olfr1262	52.27	TRUE	chr2	90000145	90008291	0	0	0	1	unknown
p007-bdf1_064	Olfr1509	37.79	TRUE	chr14	52442990	52452574	16	0	1	1	DBA2
p007-bdf1_064	Olfr180	26.59	TRUE	chr16	58914285	58929392	0	0	0	1	B6
p007-bdf1_065	Olfr536	325.82	TRUE	chr7	140500849	140507396	0	0	0	1	unknown
p007-bdf1_065	Olfr472	325.12	TRUE	chr7	107897902	107907762	0	0	0	1	unknown
p007-bdf1_065	Olfr1437	237.18	TRUE	chr19	12319207	12325101	0	0	0	1	B6
p007-bdf1_065	Olfr1038-ps	173.29	TRUE	chr2	86120223	86126356	386	1	6	1	DBA2
p007-bdf1_065	Olfr832	152.82	TRUE	chr9	18937122	18948940	0	0	0	1	unknown
p007-bdf1_065	Olfr936	127.14	TRUE	chr9	39046614	39047550	0	64	1	1	B6
p007-bdf1_065	Olfr1377	124.3	TRUE	chr11	50981967	50986593	0	0	0	1	unknown
p007-bdf1_065	Olfr493	122.22	TRUE	chr7	108346035	108346979	0	0	0	1	unknown
p007-bdf1_065	Olfr1012	120.38	TRUE	chr2	85757353	85762766	0	257	5	1	B6
p007-bdf1_065	Olfr222	105.14	TRUE	chr11	59570255	59576235	0	0	0	1	unknown
p007-bdf1_065	Olfr131	94.82	TRUE	chr17	38081624	38088693	0	60	1	1	B6
p007-bdf1_065	Olfr196	64.9	TRUE	chr16	59166647	59170454	186	1	19	1	DBA2
p007-bdf1_065	Olfr46	45.7	TRUE	chr7	140601269	140617678	0	0	0	1	unknown
p007-bdf1_065	Olfr463	21.39	TRUE	chr11	87892618	87897387	0	58	11	1	B6
p007-bdf1_065	Olfr520	15.01	TRUE	chr7	99730273	99736399	47	0	7	1	DBA2
p007-bdf1_066	Olfr473	77.99	TRUE	chr7	107930446	107935661	0	0	0	1	unknown	all allele is unknown, excluded for stats
p007-bdf1_066	Olfr1411	21.26	TRUE	chr1	92594411	92597753	0	0	0	1	unknown
p007-bdf1_066	Olfr538	19.84	TRUE	chr7	140567886	140575793	0	0	0	1	unknown
p007-bdf1_067	Olfr1176	468.56	TRUE	chr2	88336721	88342048	0	0	0	1	unknown	nuclear morphology is abnormal, excluded for stats
p007-bdf1_067	Olfr55	111.95	TRUE	chr17	33168447	33180753	0	0	0	1	DBA2
p007-bdf1_067	Olfr372	28.13	TRUE	chr8	72041218	72060630	1	113	18	1	B6
p007-bdf1_068	Olfr1046	214.2	TRUE	chr2	86214987	86219314	124	0	1	1	DBA2
p007-bdf1_068	Olfr370	32.44	TRUE	chr8	83535780	83545227	1	140	30	1	B6
p007-bdf1_068	Olfr536	21.75	TRUE	chr7	140500849	140507396	0	0	0	1	unknown
p007-bdf1_068	Olfr1389	17.16	TRUE	chr11	49423067	49432968	0	0	0	1	unknown
p007-bdf1_070	Olfr353	82.94	TRUE	chr2	36887293	36892936	0	0	0	1	unknown	all allele is unknown, excluded for stats
p007-bdf1_070	Olfr924	39.41	TRUE	chr9	38844449	38851495	0	0	0	1	unknown
p007-bdf1_071	Olfr1220	131.81	TRUE	chr2	89094188	89106835	173	0	4	1	DBA2
p007-bdf1_071	Olfr309	89	TRUE	chr7	86304474	86313708	0	0	0	1	B6
p007-bdf1_076	Olfr602-ps1	1858.69	TRUE	chr7	103367520	103372443	3587	11	4	1	DBA2
p007-bdf1_076	Olfr620	1711.73	TRUE	chr7	103604895	103612534	10	6938	10	1	B6
p007-bdf1_076	Olfr651	118.96	TRUE	chr7	104550133	104554422	1	216	12	1	B6	Olfr651 in a bad region, excluded for stats
p007-bdf1_079	Olfr536	134.63	TRUE	chr7	140500849	140507396	0	0	0	1	unknown
p007-bdf1_079	Olfr259	115.09	TRUE	chr2	87104578	87114567	1	293	14	1	B6
p007-bdf1_080	Olfr1295	136.86	TRUE	chr2	111561423	111569681	0	0	0	1	unknown
p007-bdf1_080	Olfr1301	35.13	TRUE	chr2	111751006	111758852	0	9	1	1	B6
p014-bc_003	Olfr24	1136.13	TRUE	chr9	18751507	18763996	5231	37	132	1	CAST
p014-bc_003	Olfr111	296.69	TRUE	chr17	37508030	37532449	0	237	2	1	B6	Olfr111 in a bad region
p014-bc_003	Olfr1480	166.46	TRUE	chr19	13527913	13531275	0	73	2	1	B6
p014-bc_003	Olfr672	111.87	TRUE	chr7	104995760	105002029	0	64	3	0	CAST
p014-bc_003	Olfr190	102.28	TRUE	chr16	59067140	59078005	0	47	1	1	B6
p014-bc_003	Olfr1354	91.51	TRUE	chr10	78913171	78920399	158	0	9	1	CAST
p014-bc_003	Olfr1133	91.17	TRUE	chr2	87645180	87647374	0	0	0	1	unknown
p014-bc_003	Olfr315	65.13	TRUE	chr11	58773188	58780251	0	32	1	1	B6
p014-bc_003	Olfr1347	58.28	TRUE	chr7	6486944	6499755	50	16	4	1	CAST
p014-bc_003	Olfr533	51.17	TRUE	chr7	140463370	140468128	126	5	16	0	CAST
p014-bc_003	Olfr726	41.05	TRUE	chr14	50083570	50090953	48	0	3	1	CAST
p014-bc_003	Olfr325	32.18	TRUE	chr11	58577730	58582365	18	0	1	1	CAST
p014-bc_003	Olfr1080	29.16	TRUE	chr2	86552675	86558235	0	0	0	1	unknown
p014-bc_004	Olfr849	141.36	TRUE	chr9	19440266	19446923	0	142	5	1	B6
p014-bc_004	Olfr1153	117.44	TRUE	chr2	87894962	87898310	0	0	0	1	unknown
p014-bc_004	Olfr111	96.03	TRUE	chr17	37508030	37532449	0	71	4	1	B6
p014-bc_004	Olfr1347	93.25	TRUE	chr7	6486944	6499755	0	81	2	1	B6
p014-bc_004	Olfr1427	86.86	TRUE	chr19	12098006	12103334	176	0	11	1	CAST
p014-bc_004	Olfr690	65.06	TRUE	chr7	105328225	105334104	0	54	3	1	B6
p014-bc_004	Olfr411	51.91	TRUE	chr11	74345129	74352650	0	0	0	1	unknown
p014-bc_005	Olfr485	550.51	TRUE	chr7	108158918	108159871	193	0	7	0	CAST
p014-bc_005	Olfr364-ps1	432.06	TRUE	chr2	37139322	37148585	1072	2	43	1	CAST
p014-bc_005	Olfr541	281.86	TRUE	chr7	140697267	140705606	307	20	18	0	CAST
p014-bc_005	Olfr839-ps1	131.39	TRUE	chr9	19168407	19177312	56	638	20	0	CAST
p014-bc_005	Olfr121	128.57	TRUE	chr17	37748855	37753169	0	0	0	1	unknown
p014-bc_011	Olfr53	695.16	TRUE	chr7	140646452	140653085	2	1307	23	0	CAST
p014-bc_011	Olfr303	462.12	TRUE	chr7	86391810	86397789	3	1388	21	1	B6
p014-bc_011	Olfr1507	217.5	TRUE	chr14	52488791	52495749	0	252	3	1	B6
p014-bc_011	Olfr1026	157.22	TRUE	chr2	85921558	85924623	150	0	3	1	CAST	Olfr1026 in a bad region
p014-bc_011	Olfr1031	95.4	TRUE	chr2	85990304	85993704	0	0	0	1	unknown
p014-bc_011	Olfr734	78.38	TRUE	chr14	50316506	50326761	0	0	0	1	unknown
p014-bc_011	Olfr16	54.58	TRUE	chr1	172950409	172958357	0	105	7	1	B6
p014-bc_022	Olfr672	206.55	TRUE	chr7	104995760	105002029	0	53	3	1	B6
p014-bc_022	Olfr1045	140.2	TRUE	chr2	86195910	86203009	397	0	24	1	CAST	Olfr1045 in a bad region
p014-bc_022	Olfr373	132.89	TRUE	chr8	72083177	72103084	0	255	13	1	B6
p014-bc_022	Olfr1507	61.02	TRUE	chr14	52488791	52495749	30	0	1	1	CAST
p014-bc_022	Olfr1348	54.78	TRUE	chr7	6499793	6508748	14	0	1	0	CAST
p014-bc_022	Olfr727	51.54	TRUE	chr14	50123186	50128746	0	24	1	1	B6
p014-bc_029	Olfr1050-ps1	695.5	TRUE	chr2	86267879	86268825	0	0	0	1	unknown
p014-bc_029	Olfr672	123.74	TRUE	chr7	104995760	105002029	0	113	3	1	B6
p014-bc_029	Olfr727	91.34	TRUE	chr14	50123186	50128746	66	0	1	1	CAST
p014-bc_029	Olfr1222	62.62	TRUE	chr2	89122885	89133054	0	0	0	1	unknown
p014-bc_034	Olfr727	388.05	TRUE	chr14	50123186	50128746	418	1	10	1	CAST
p014-bc_034	Olfr139	220.37	TRUE	chr11	74044033	74056551	313	0	7	1	CAST
p014-bc_034	Olfr1052	126.56	TRUE	chr2	86292455	86299233	0	91	1	1	B6
p014-bc_034	Olfr1026	111.24	TRUE	chr2	85921558	85924623	0	173	3	1	B6
p014-bc_034	Olfr1048	96.7	TRUE	chr2	86233951	86240289	0	0	0	1	unknown
p014-bc_034	Olfr943	85.79	TRUE	chr9	39166304	39192350	172	0	10	1	CAST
p014-bc_034	Olfr1079	79.64	TRUE	chr2	86536949	86542480	0	0	0	1	CAST	Olfr1079 in a bad region
p014-bc_034	Olfr969	75.19	TRUE	chr9	39790945	39796635	0	0	0	1	unknown
p014-bc_034	Olfr1113	70.89	TRUE	chr2	87208970	87214650	0	0	0	1	unknown
p014-bc_034	Olfr1134	68.82	TRUE	chr2	87655673	87658460	0	56	1	1	B6
p014-bc_034	Olfr1131	67.69	TRUE	chr2	87627104	87630203	55	0	1	1	CAST	Olfr1131 in a bad region
p014-bc_034	Olfr1241	52	TRUE	chr2	89481314	89487126	0	0	0	1	unknown
p014-bc_034	Olfr1507	43.18	TRUE	chr14	52488791	52495749	57	0	1	1	CAST
p014-bc_034	Olfr742	42.7	TRUE	chr14	50503600	50517145	55	0	4	1	CAST
p014-bc_034	Olfr341	35.5	TRUE	chr2	36473721	36482468	96	0	4	1	CAST
p014-bc_034	Olfr30	34.91	TRUE	chr11	58454105	58462270	0	0	0	1	unknown
p014-bc_034	Olfr156	34.16	TRUE	chr4	43820132	43823895	241	0	27	0	CAST
p014-bc_034	Olfr1256	25.75	TRUE	chr2	89825311	89841555	0	0	0	1	unknown
p014-bc_034	Olfr133	25.69	TRUE	chr17	38145281	38151269	5	0	1	1	CAST
p014-bc_034	Olfr696-ps1	19.92	TRUE	chr7	106728872	106729819	0	66	8	1	B6
p014-bdf1_046	Olfr212	79.28	TRUE	chr6	116506516	116517965	0	0	0	1	unknown
p014-bdf1_046	Olfr1213	19.67	TRUE	chr2	88972055	88980281	0	28	4	1	B6
p014-bdf1_051	Olfr192	64.6	TRUE	chr16	59097981	59101853	27	1	1	0	DBA2
p014-bdf1_051	Olfr1211	39.81	TRUE	chr2	88926876	88938111	1	47	5	1	B6
p014-bdf1_051	Olfr846	37.4	TRUE	chr9	19357065	19364005	0	0	0	1	unknown
p014-bdf1_054	Olfr543	644.51	TRUE	chr7	102476579	102481679	1388	4	12	1	DBA2
p014-bdf1_054	Olfr1015	158.16	TRUE	chr2	85782017	85787812	1	351	8	1	B6
p014-bdf1_055	Olfr465-ps1	36.06	TRUE	chr13	65138089	65146047	1	150	19	1	B6
p014-bdf1_055	Olfr213	22.66	TRUE	chr6	116538456	116544292	0	0	0	1	unknown
p014-bdf1_055	Olfr1140	19.5	TRUE	chr2	87743752	87747581	37	0	2	1	DBA2
p028-bdf1_004	Olfr582	888.59	TRUE	chr7	103038024	103044040	0	0	0	1	unknown
p028-bdf1_004	Olfr1340	727.46	TRUE	chr4	118720138	118729395	0	238	4	1	B6
p028-bdf1_033	Olfr1112	723.03	TRUE	chr2	87187798	87192767	0	115	1	1	B6
p028-bdf1_033	Olfr1293-ps	681.99	TRUE	chr2	111525203	111533279	0	0	0	1	unknown
p028-bdf1_038	Olfr1310	802.79	TRUE	chr2	112004574	112012708	34	0	1	1	DBA2
p028-bdf1_038	Olfr191	170.91	TRUE	chr16	59082829	59089822	0	106	5	1	B6
p028-bdf1_038	Olfr1416	64.99	TRUE	chr1	92475925	92485113	4	0	2	1	DBA2
p070-bdf1_005	Olfr1257	369.93	TRUE	chr2	89878437	89883026	0	0	0	1	unknown
p070-bdf1_005	Olfr467	260.68	TRUE	chr7	107812263	107816336	0	0	0	1	unknown
p070-bdf1_005	Olfr697	152.39	TRUE	chr7	106740834	106742443	0	0	0	1	unknown
p070-bdf1_005	Olfr478	126.8	TRUE	chr7	108029965	108033989	0	0	0	1	unknown
p070-bdf1_005	Olfr1052	122.93	TRUE	chr2	86292455	86299233	99	0	2	1	DBA2
p070-bdf1_005	Olfr373	122.21	TRUE	chr8	72083177	72103084	81	0	4	0	DBA2
p070-bdf1_005	Olfr703	75.1	TRUE	chr7	106843360	106846207	53	2	5	1	DBA2
p070-bdf1_005	Olfr19	73.94	TRUE	chr16	16672228	16676405	0	0	0	1	unknown
p070-bdf1_009	Olfr1507	314.6	TRUE	chr14	52488791	52495749	0	338	11	1	B6
p070-bdf1_009	Olfr1065	168.22	TRUE	chr2	86443958	86450591	0	178	4	1	B6
p119-bc_016	Olfr1262	214.99	TRUE	chr2	90000145	90008291	0	0	0	1	unknown
p119-bc_016	Olfr1428	144.42	TRUE	chr19	12107716	12115897	116	2	14	1	CAST
p119-bc_016	Olfr969	97.92	TRUE	chr9	39790945	39796635	0	0	0	1	unknown
p119-bc_016	Olfr736	92.08	TRUE	chr14	50381163	50394192	51	0	6	1	CAST
p119-bc_016	Olfr345	62.32	TRUE	chr2	36640041	36640976	0	33	7	1	B6
p119-bc_016	Olfr727	55.57	TRUE	chr14	50123186	50128746	16	0	1	1	CAST

## Sheet: silencing stage
Cell	name	FPKM	status	contig	start	stop	aCount	bCount	n_variants	gw_phased	homolog
p003-bdf1_030	Olfr1364	3625.4	TRUE	chr13	21571813	21581759	4	4734	2	1	B6	second OR allele is unknown, excluded for stats
p003-bdf1_030	Olfr1348	297.97	TRUE	chr7	6499793	6508748	0	0	0	1	unknown
p007-bc_002	Olfr972	12002	TRUE	chr9	39866422	39874651	26291	54	10	1	CAST
p007-bc_002	Olfr470	62.67	TRUE	chr7	107842905	107847490	1	144	11	1	B6
p007-bc_002	Olfr170	51.68	TRUE	chr16	19605696	19611882	0	0	0	1	unknown
p007-bc_002	Olfr448	47.55	TRUE	chr6	42890441	42899085	0	221	30	1	B6
p007-bc_002	Olfr944	44.72	TRUE	chr9	39201920	39218421	92	0	8	1	CAST
p007-bc_002	Olfr559	43.05	TRUE	chr7	102723207	102727491	0	154	18	1	B6
p007-bc_002	Olfr44	37.08	TRUE	chr9	39481786	39493995	68	0	2	1	CAST
p007-bc_002	Olfr430	25.7	TRUE	chr1	174066605	174072273	0	0	0	1	unknown
p007-bc_002	Olfr875	20.73	TRUE	chr9	37771857	37774459	48	0	5	1	CAST
p007-bc_003	Olfr527	1712.7	TRUE	chr7	140334017	140338551	13347	13	45	1	CAST
p007-bc_003	Olfr1511	106.48	TRUE	chr14	52389794	52397379	233	0	10	1	CAST
p007-bc_003	Olfr543	88.1	TRUE	chr7	102476579	102481679	287	0	14	1	CAST
p007-bc_003	Olfr1532-ps1	66.37	TRUE	chr7	106908001	106916265	0	109	6	1	B6
p007-bc_003	Olfr1451	14.08	TRUE	chr19	12995014	13000417	0	10	1	1	B6
p007-bc_010	Olfr1184	4499.05	TRUE	chr2	88483598	88489284	0	0	0	1	unknown	The dominant oR allele is unknown, excluded for stats
p007-bc_010	Olfr1419	80.8	TRUE	chr19	11868613	11875106	184	0	5	1	CAST
p007-bc_010	Olfr323	12.19	TRUE	chr11	58624159	58630501	44	0	20	1	CAST
p007-bc_017	Olfr1250	9301.99	TRUE	chr2	89653773	89661467	1915	1	1	1	CAST
p007-bc_017	Olfr215	127.71	TRUE	chr6	116580084	116584195	1354	1	18	1	CAST
p007-bc_017	Olfr813	101.87	TRUE	chr10	129855367	129858722	56	0	3	1	CAST
p007-bc_017	Olfr1437	83.26	TRUE	chr19	12319207	12325101	95	1	3	1	CAST
p007-bc_017	Olfr640	73.55	TRUE	chr7	104018686	104025573	0	151	12	1	B6
p007-bc_017	Olfr692	40.69	TRUE	chr7	105368230	105369355	54	0	2	0	CAST
p007-bdf1_048	Olfr190	3825.51	TRUE	chr16	59067140	59078005	6	8117	25	1	B6
p007-bdf1_048	Olfr291	130.86	TRUE	chr7	84853553	84859612	0	6	2	1	B6
p007-bdf1_048	Olfr31	61.17	TRUE	chr14	14322828	14331791	0	116	13	1	B6
p007-bdf1_048	Olfr974	33.36	TRUE	chr9	39937501	39945170	0	0	0	1	unknown
p007-bdf1_052	Olfr669	16603	TRUE	chr7	104934240	104940477	0	0	0	1	unknown	The dominant oR allele is unknown, excluded for stats
p007-bdf1_052	Olfr116	667.67	TRUE	chr17	37620577	37627199	163	0	1	1	DBA2
p007-bdf1_054	Olfr536	3669.75	TRUE	chr7	140500849	140507396	0	0	0	1	unknown	The dominant oR allele is unknown, excluded for stats
p007-bdf1_054	Olfr1208	386.98	TRUE	chr2	88895575	88902311	361	0	9	1	DBA2
p007-bdf1_054	Olfr1079	93.36	TRUE	chr2	86536949	86542480	0	0	0	1	unknown
p007-bdf1_054	Olfr531	66.32	TRUE	chr7	140399045	140402918	0	0	0	1	unknown
p007-bdf1_054	Olfr945	51.3	TRUE	chr9	39256869	39276818	0	0	0	1	B6
p007-bdf1_054	Olfr1310	44.91	TRUE	chr2	112004574	112012708	0	0	0	1	unknown
p007-bdf1_069	Olfr330	11721.6	TRUE	chr11	58527186	58534836	0	102	9	1	B6
p007-bdf1_069	Olfr131	238.44	TRUE	chr17	38081624	38088693	104	0	1	1	DBA2
p007-bdf1_069	Olfr812	90.39	TRUE	chr10	129841418	129846094	0	0	0	1	unknown
p007-bdf1_076	Olfr620	1711.73	TRUE	chr7	103604895	103612534	10	6938	10	1	B6
p007-bdf1_076	Olfr651	118.96	TRUE	chr7	104550133	104554422	1	216	12	1	B6
p014-bc_001	Olfr329	8265.3	TRUE	chr11	58539801	58546422	14	14186	23	1	B6
p014-bc_001	Olfr1180	81.56	TRUE	chr2	88410649	88419151	0	0	0	1	unknown
p014-bc_001	Olfr1347	80.5	TRUE	chr7	6486944	6499755	99	0	2	0	B6
p014-bc_001	Olfr1428	74.8	TRUE	chr19	12107716	12115897	0	163	14	1	B6
p014-bc_001	Olfr6	54.91	TRUE	chr7	106953251	106963937	0	102	9	1	B6
p014-bc_001	Olfr1044	53.71	TRUE	chr2	86168589	86177820	0	36	2	1	B6
p014-bc_001	Olfr15	43.26	TRUE	chr16	3830878	3844747	0	97	9	1	B6
p014-bc_001	Olfr1565	40.46	TRUE	chr2	90322200	90326360	0	0	0	1	unknown
p014-bc_001	Olfr48	32.68	TRUE	chr2	89841793	89848205	0	0	0	1	unknown
p014-bc_001	Olfr872	24.74	TRUE	chr9	20237119	20261643	0	37	5	1	B6
p014-bc_001	Olfr672	10.91	TRUE	chr7	104995760	105002029	9	0	3	1	CAST
p014-bc_002	Olfr27	6450.74	TRUE	chr9	39128131	39145072	10	7094	21	1	B6	excluded due to weak OR interaction
p014-bc_002	Olfr1014	186.1	TRUE	chr2	85772713	85778974	0	99	4	1	B6
p014-bc_002	Olfr816	139.95	TRUE	chr10	129909163	129915597	0	116	8	1	B6
p014-bc_002	Olfr417	133.24	TRUE	chr1	174365122	174374472	202	0	17	1	CAST
p014-bc_002	Olfr198	113.56	TRUE	chr16	59200352	59203533	70	0	2	0	B6
p014-bc_002	Olfr127	23.86	TRUE	chr17	37900437	37906795	0	7	2	1	B6
p014-bc_010	Olfr1509	4540.24	TRUE	chr14	52442990	52452574	3	3365	18	1	B6
p014-bc_010	Olfr1348	158.9	TRUE	chr7	6499793	6508748	57	0	3	1	CAST
p014-bc_024	Olfr1404	4573.07	TRUE	chr1	173212392	173218583	35796	21	26	1	CAST
p014-bc_024	Olfr1321	272.19	TRUE	chrX	49723577	49735059	1	321	6	1	B6
p014-bc_024	Olfr371	179.25	TRUE	chr8	85225988	85231509	0	235	4	1	B6
p014-bc_024	Olfr1501	120.09	TRUE	chr19	13835033	13850692	1	58	4	0	CAST
p014-bc_024	Olfr195	110.58	TRUE	chr16	59147046	59150777	1	96	3	0	B6
p014-bc_024	Olfr805	77.79	TRUE	chr10	129721221	129729375	0	245	11	1	B6
p014-bc_024	Olfr198	59.92	TRUE	chr16	59200352	59203533	54	0	2	0	B6
p014-bc_024	Olfr1508	33.09	TRUE	chr14	52458829	52467495	0	182	10	1	B6
p014-bc_025	Olfr55	2040.76	TRUE	chr17	33168447	33180753	26	0	1	1	CAST
p014-bc_025	Olfr1348	195.01	TRUE	chr7	6499793	6508748	82	97	2	0	CAST
p014-bc_025	Olfr727	190.26	TRUE	chr14	50123186	50128746	103	0	1	1	CAST
p014-bc_025	Olfr1321	156.13	TRUE	chrX	49723577	49735059	0	140	3	1	B6
p014-bc_025	Olfr384	128.16	TRUE	chr11	73598594	73605092	92	0	2	1	CAST
p014-bc_025	Olfr1026	126.24	TRUE	chr2	85921558	85924623	0	126	3	1	B6
p014-bc_025	Olfr704	71.79	TRUE	chr7	106863185	106870921	104	0	10	0	B6
p014-bc_025	Olfr1087	70.66	TRUE	chr2	86687235	86698395	0	0	0	1	unknown
p014-bc_025	Olfr1200	63.74	TRUE	chr2	88763511	88770488	0	0	0	1	unknown
p014-bc_025	Olfr131	44.31	TRUE	chr17	38081624	38088693	0	0	0	1	unknown
p014-bc_025	Olfr705	28.7	TRUE	chr7	106871870	106876891	0	65	11	1	B6
p014-bc_027	Olfr492	1479.18	TRUE	chr7	108322730	108323674	5	4178	7	1	B6
p014-bc_027	Olfr727	439.59	TRUE	chr14	50123186	50128746	385	0	1	1	CAST
p014-bc_027	Olfr1026	185.31	TRUE	chr2	85921558	85924623	0	265	3	1	B6
p014-bc_027	Olfr292	37.79	TRUE	chr7	86688330	86697507	270	0	9	1	CAST
p014-bc_028	Olfr485	1634.03	TRUE	chr7	108158918	108159871	1078	0	7	0	CAST
p014-bc_028	Olfr165	389.8	TRUE	chr16	19406244	19423134	1219	1	8	1	CAST
p014-bc_028	Olfr205	275.49	TRUE	chr16	59328005	59331138	0	292	3	1	B6
p014-bc_028	Olfr727	110.98	TRUE	chr14	50123186	50128746	54	0	2	1	CAST	Olfr727 in a bad region
p014-bc_028	Olfr133	100.41	TRUE	chr17	38145281	38151269	31	0	1	1	CAST	Olfr133 in a bad region
p014-bc_028	Olfr750	71.13	TRUE	chr14	51066301	51074435	150	0	4	1	CAST
p014-bc_028	Olfr521	64.41	TRUE	chr7	99763507	99769321	1	212	14	1	B6
p014-bc_028	Olfr1196	19.54	TRUE	chr2	88697303	88704597	0	0	0	1	unknown
p014-bc_031	Olfr1271	5875.22	TRUE	chr2	90260546	90271032	0	0	0	1	unknown	The dominant oR allele is unknown, excluded for stats
p014-bc_031	Olfr263	138.66	TRUE	chr13	21129639	21136296	0	248	8	0	CAST
p014-bc_031	Olfr1211	49.09	TRUE	chr2	88926876	88938111	0	0	0	1	unknown
p014-bc_031	Olfr727	35.25	TRUE	chr14	50123186	50128746	0	0	0	1	unknown
p014-bc_031	Olfr591	20.83	TRUE	chr7	103167074	103178340	55	0	4	1	CAST
p014-bdf1_052	Olfr1042	1995.2	TRUE	chr2	86156743	86161838	1	2347	1	0	DBA2
p014-bdf1_052	Olfr1347	93.04	TRUE	chr7	6486944	6499755	0	0	0	1	unknown
p014-bdf1_052	Olfr1025-ps1	88.34	TRUE	chr2	85915193	85921381	6	0	1	1	DBA2
p014-bdf1_052	Olfr99	76.4	TRUE	chr17	37279043	37283460	158	0	8	1	DBA2
p014-bdf1_052	Olfr987	55.61	TRUE	chr2	85330779	85339315	0	0	0	1	unknown
p014-bdf1_052	Olfr798	50.52	TRUE	chr10	129622615	129627934	0	0	0	1	unknown
p014-bdf1_052	Olfr464	21.07	TRUE	chr11	87913268	87920967	0	56	9	1	B6
p028-bdf1_013	Olfr804	2539.91	TRUE	chr10	129703210	129710018	0	0	0	1	unknown	The dominant oR allele is unknown, excluded for stats
p028-bdf1_013	Olfr1229	26.97	TRUE	chr2	89280476	89288014	0	0	0	1	unknown
p028-bdf1_013	Olfr1395	17.11	TRUE	chr11	49142274	49150453	0	0	0	1	unknown
p028-bdf1_032	Olfr190	2171.04	TRUE	chr16	59067140	59078005	11430	89	29	1	DBA2
p028-bdf1_032	Olfr224	51.17	TRUE	chr11	58565856	58570553	0	38	5	1	B6
p028-bdf1_039	Olfr790	1860.45	TRUE	chr10	129498492	129503342	0	0	0	1	unknown	The dominant oR allele is unknown, excluded for stats
p028-bdf1_039	Olfr1446	72.08	TRUE	chr19	12888266	12893524	0	0	0	1	unknown
p028-bdf1_053	Olfr1174	11720.1	TRUE	chr2	88310284	88315135	0	0	0	1	DBA2
p028-bdf1_053	Olfr330	183.58	TRUE	chr11	58527186	58534836	0	0	0	1	unknown
p028-bdf1_053	Olfr195	109.29	TRUE	chr16	59147046	59150777	0	0	0	1	DBA2
p028-bdf1_056	Olfr63	6010.31	TRUE	chr17	33264676	33275644	1	2658	3	1	B6
p028-bdf1_056	Olfr131	145.98	TRUE	chr17	38081624	38088693	0	59	1	1	B6
p028-bdf1_056	Olfr186	120.02	TRUE	chr16	59025797	59030291	0	137	6	1	B6
p028-bdf1_056	Olfr572	118.31	TRUE	chr7	102924409	102928608	0	142	4	0	B6
p028-bdf1_056	Olfr1350	116.14	TRUE	chr7	6564841	6571401	0	0	0	1	unknown
p028-bdf1_056	Olfr808	54.14	TRUE	chr10	129765482	129771713	0	0	0	1	unknown
p028-bdf1_057	Olfr138	5482.65	TRUE	chr17	38261035	38276410	0	0	0	1	unknown	The dominant oR allele is unknown, excluded for stats
p028-bdf1_057	Olfr727	118.53	TRUE	chr14	50123186	50128746	2	67	1	0	B6
p028-bdf1_057	Olfr533	70.89	TRUE	chr7	140463370	140468128	0	0	0	1	unknown
p028-bdf1_057	Olfr1302	43.58	TRUE	chr2	111777429	111782700	77	0	6	1	DBA2
p028-bdf1_065	Olfr450	10042	TRUE	chr6	42811939	42819081	0	0	0	1	unknown	The dominant oR allele is unknown, excluded for stats
p028-bdf1_065	Olfr728	112.43	TRUE	chr14	50133758	50142680	147	0	9	1	DBA2
p028-bdf1_067	Olfr988	4013.63	TRUE	chr2	85352428	85363227	0	80	1	1	B6
p028-bdf1_067	Olfr1383	259.57	TRUE	chr11	49519648	49527199	0	0	0	1	unknown
p028-bdf1_067	Olfr727	177.64	TRUE	chr14	50123186	50128746	0	86	1	1	B6
p028-bdf1_067	Olfr811	52.23	TRUE	chr10	129800615	129804396	0	0	0	1	unknown
p028-bdf1_069	Olfr555	1448.55	TRUE	chr7	102658823	102659770	642	0	1	1	DBA2
p028-bdf1_069	Olfr263	44.12	TRUE	chr13	21129639	21136296	0	37	7	1	B6
p028-bdf1_070	Olfr1314	5040.14	TRUE	chr2	112089786	112096781	4385	4	5	1	DBA2
p028-bdf1_070	Olfr131	136.92	TRUE	chr17	38081624	38088693	0	120	2	1	B6
p028-bdf1_070	Olfr1348	31.14	TRUE	chr7	6499793	6508748	0	0	0	1	unknown
p060-bdf1_001	Olfr726	7643.68	TRUE	chr14	50083570	50090953	4329	6	1	0	DBA2	second OR allele is unknown, excluded for stats
p060-bdf1_001	Olfr1228	1566.31	TRUE	chr2	89247964	89254062	0	0	0	1	unknown
p060-bdf1_004	Olfr706	8049.46	TRUE	chr7	106882589	106888162	4469	7	15	1	DBA2
p060-bdf1_004	Olfr195	164.44	TRUE	chr16	59147046	59150777	0	0	0	1	DBA2
p060-bdf1_012	Olfr270	3741.29	TRUE	chr4	52964547	52972474	36	14097	23	1	B6	second OR allele is unknown, excluded for stats
p060-bdf1_012	Olfr1347	787.99	TRUE	chr7	6486944	6499755	0	0	0	1	unknown
p060-bdf1_029	Olfr1123	23198.5	TRUE	chr2	87416635	87423211	75	27715	29	1	B6
p060-bdf1_029	Olfr180	476.54	TRUE	chr16	58914285	58929392	37	0	2	0	DBA2
p070-bdf1_007	Olfr177	10860.1	TRUE	chr16	58870955	58874768	7	6755	12	1	B6
p070-bdf1_007	Olfr730	448.97	TRUE	chr14	50183296	50188198	0	915	12	1	B6
p070-bdf1_012	Olfr872	3966.28	TRUE	chr9	20237119	20261643	0	0	0	1	unknown	The dominant oR allele is unknown, excluded for stats
p070-bdf1_012	Olfr881	135.16	TRUE	chr9	37991825	37996408	0	58	1	1	B6
p070-bdf1_012	Olfr96	74.17	TRUE	chr17	37220146	37226673	0	17	1	1	B6
p070-bdf1_012	Olfr1509	45.94	TRUE	chr14	52442990	52452574	8	0	1	1	DBA2
p070-bdf1_012	Olfr1200	39.59	TRUE	chr2	88763511	88770488	0	86	4	1	B6
p070-bdf1_014	Olfr1080	13032.4	TRUE	chr2	86552675	86558235	0	0	0	1	B6
p070-bdf1_014	Olfr640	503.09	TRUE	chr7	104018686	104025573	105	0	1	1	DBA2
p070-bdf1_014	Olfr1348	257.29	TRUE	chr7	6499793	6508748	0	0	0	1	unknown
p070-bdf1_014	Olfr1079	108.48	TRUE	chr2	86536949	86542480	0	0	0	1	unknown
p070-bdf1_014	Olfr1116	93.09	TRUE	chr2	87267534	87278262	0	0	0	1	unknown
p070-bdf1_014	Olfr728	83.97	TRUE	chr14	50133758	50142680	293	0	16	1	DBA2
p070-bdf1_014	Olfr291	47.65	TRUE	chr7	84853553	84859612	46	0	3	1	DBA2
p070-bdf1_014	Olfr71	45.54	TRUE	chr4	43704562	43710255	0	0	0	1	unknown
p070-bdf1_015	Olfr1446	5594.74	TRUE	chr19	12888266	12893524	0	101	1	1	B6	second OR allele is unknown, excluded for stats
p070-bdf1_015	Olfr472	187.5	TRUE	chr7	107897902	107907762	0	0	0	1	unknown
p111-bc_005	Olfr808	16758.4	TRUE	chr10	129765482	129771713	6912	3	2	0	CAST	excluded due to weak OR interaction
p111-bc_005	Olfr809	510.21	TRUE	chr10	129774638	129778937	1352	1	9	0	CAST
p119-bc_021	Olfr166	3325.45	TRUE	chr16	19483694	19489882	60	12141	46	0	CAST
p119-bc_021	Olfr309	98.7	TRUE	chr7	86304474	86313708	0	24	1	1	B6
p119-bc_021	Olfr390	80.52	TRUE	chr11	73782964	73790446	4	52	6	0	CAST
p119-bc_022	Olfr739	3916.59	TRUE	chr14	50418626	50427888	12	4848	6	0	CAST	excluded due to weak OR interaction
p119-bc_022	Olfr222	84.6	TRUE	chr11	59570255	59576235	282	0	39	1	CAST
p119-bc_022	Olfr1386	77.39	TRUE	chr11	49465046	49471715	115	0	5	1	CAST
p119-bc_022	Olfr1388	44.61	TRUE	chr11	49436624	49446103	57	0	5	1	CAST

## Sheet: singular OR determination stage
Cell	name	FPKM	status	contig	start	stop	aCount	bCount	n_variants	gw_phased	homolog	note
p003-bdf1_016	Olfr1495	1434.68	TRUE	chr19	13764606	13770248	0	70	1	1	B6
p003-bdf1_035	Olfr127	4797.85	TRUE	chr17	37900437	37906795	1501	0	2	1	DBA2
p003-bdf1_036	Olfr1462	5896.16	TRUE	chr19	13185734	13193775	7988	0	3	1	DBA2	nuclear morphology is abnormal, excluded for stats
p003-bdf1_039	Olfr17	7084.93	TRUE	chr7	107093220	107099808	17	16875	11	1	B6
p007-bdf1_004	Olfr1395	20750.8	TRUE	chr11	49142274	49150453	0	0	0	1	unknown	allele is unknown, excluded for stats
p007-bdf1_006	Olfr120	12321.1	TRUE	chr17	37721808	37727220	16	9713	7	0	B6
p007-bdf1_008	Olfr1394	11023.5	TRUE	chr11	49154377	49162854	0	0	0	1	unknown	allele is unknown, excluded for stats
p007-bdf1_009	Olfr449	23782.8	TRUE	chr6	42834384	42839516	0	0	0	1	unknown	allele is unknown, excluded for stats
p007-bdf1_061	Olfr480	2351.4	TRUE	chr7	108064878	108067346	0	0	0	1	unknown	allele is unknown, excluded for stats
p014-bc_008	Olfr549	33574.3	TRUE	chr7	102549870	102555842	139	75144	39	1	B6
p014-bdf1_029	Olfr310	5316.45	TRUE	chr7	86268487	86277172	2610	22	9	1	DBA2
p028-bdf1_001	Olfr1348	4621.34	TRUE	chr7	6499793	6508748	0	0	0	1	unknown	allele is unknown, excluded for stats
p028-bdf1_008	Olfr525	1818.56	TRUE	chr7	140320858	140327625	0	0	0	1	unknown	allele is unknown, excluded for stats
p028-bdf1_012	Olfr145	1535.89	TRUE	chr9	37896724	37903519	17	2240	3	0	DBA2
p028-bdf1_028	Olfr805	30817.3	TRUE	chr10	129721221	129729375	0	0	0	1	unknown	allele is unknown, excluded for stats
p028-bdf1_030	Olfr168	6637.58	TRUE	chr16	19529274	19535555	0	0	0	1	unknown	allele is unknown, excluded for stats
p028-bdf1_034	Olfr645	1911.35	TRUE	chr7	104081789	104085465	0	0	0	1	unknown	allele is unknown, excluded for stats
p028-bdf1_037	Olfr1029	4217.66	TRUE	chr2	85973895	85978913	2569	3	6	1	DBA2	OR interaction is too weak, excluded for stats
p028-bdf1_040	Olfr813	16452.2	TRUE	chr10	129855367	129858722	0	0	0	1	unknown	allele is unknown, excluded for stats
p028-bdf1_041	Olfr160	4871.82	TRUE	chr9	37708964	37716250	708	3	19	1	DBA2	OR interaction is too weak, excluded for stats
p028-bdf1_044	Olfr1501	8876.68	TRUE	chr19	13835033	13850692	1504	1	1	1	DBA2
p028-bdf1_047	Olfr679	9692.07	TRUE	chr7	105081205	105090642	0	0	0	1	unknown	allele is unknown, excluded for stats
p028-bdf1_050	Olfr482	6233.99	TRUE	chr7	108092999	108097586	0	0	0	1	unknown	allele is unknown, excluded for stats
p028-bdf1_051	Olfr1381	1382.51	TRUE	chr11	49543449	49556127	0	0	0	1	unknown	allele is unknown, excluded for stats
p028-bdf1_055	Olfr770	12010.8	TRUE	chr10	129132578	129138998	0	0	0	1	unknown	allele is unknown, excluded for stats
p028-bdf1_059	Olfr122	17782	TRUE	chr17	37768607	37773749	12680	9	3	0	DBA2
p028-bdf1_065	Olfr450	10042	TRUE	chr6	42811939	42819081	0	0	0	1	unknown	allele is unknown, excluded for stats
p060-bdf1_005	Olfr1126	11890	TRUE	chr2	87453962	87458911	10550	6	3	0	B6
p060-bdf1_006	Olfr117	1438.22	TRUE	chr17	37657600	37663782	772	0	3	1	DBA2
p060-bdf1_013	Olfr912	3256.79	TRUE	chr9	38580178	38586876	4	4725	4	1	B6
p060-bdf1_015	Olfr133	2082.67	TRUE	chr17	38145281	38151269	0	7	1	1	B6	OR interaction is too weak, excluded for stats
p060-bdf1_020	Olfr1233	18066	TRUE	chr2	89333208	89342398	4	7410	4	1	B6
p060-bdf1_028	Olfr675	6022.36	TRUE	chr7	105021370	105028460	0	0	0	1	unknown	allele is unknown, excluded for stats
p070-bdf1_001	Olfr1195	1438.36	TRUE	chr2	88681455	88689187	1	5101	11	1	B6
p070-bdf1_002	Olfr279	5560.52	TRUE	chr15	98492402	98502637	0	0	0	1	unknown	allele is unknown, excluded for stats
p070-bdf1_003	Olfr1205	11846.4	TRUE	chr2	88829737	88837104	24	11944	12	1	B6
p070-bdf1_004	Olfr1507	17535.7	TRUE	chr14	52488791	52495749	60	23891	29	1	B6
p070-bdf1_004	Olfr322	91.52	TRUE	chr11	58658782	58669528	0	175	13	1	B6
p070-bdf1_008	Olfr591	9860.25	TRUE	chr7	103167074	103178340	2602	3	1	1	DBA2	OR interaction is too weak, excluded for stats
p070-bdf1_011	Olfr536	10159.2	TRUE	chr7	140500849	140507396	0	0	0	1	unknown	allele is unknown, excluded for stats
p070-bdf1_013	Olfr466	11421.8	TRUE	chr13	65150240	65156152	19818	38	24	1	DBA2
p119-bc_009	Olfr1441	8441.83	TRUE	chr19	12417433	12423569	8697	19	32	1	CAST	nuclear morphology is abnormal, excluded for stats
p119-bc_028	Olfr180	47978.2	TRUE	chr16	58914285	58929392	4645	7	8	0	CAST	OR interaction is too weak, excluded for stats
