# Supplementary material for: Simultaneous single-cell three-dimensional genome and gene expression profiling Uncovers Dynamic Enhancer Connectivity Underlying Olfactory Receptor Choice
Source: Research Square preprint supplement (doi:10.21203/rs.3.rs-3210240/v1), 2023-08-03
Supplement: Supplementary file 4 [file ee249fbf46130202978c4930.xlsx]

## Sheet: Sheet1
Cell	Cluster	Read number (RNA)	Read number (genomic)	Count (RNA)	Genes (detected)	Mitocondria rna (%)	Ribosome rna (%)	Raw contacts	Contacts	Contacts (short cis)	Contacts (long cis)	Contacts (trans)	Contacts (imputed)	20kb RMS RMSD (-Sr1m -c1 -r10m -c2)	20kb RMS RMSD (-Sr1m -c1)	%duplication (contacts)
p003-bdf1_001	iOSN	4144929	14343637	1.65725e+06	4703	6.17	3.02	1486131	770968	184360	323586	263022	326467	0.761	/	48.12
p003-bdf1_002	progenitor-2	4385616	20843634	2.61836e+06	5033	14.68	11.93	3655845	1066343	224092	516325	325926	453648	0.472	/	70.83
p003-bdf1_003	progenitor-2	4276909	17090664	2.05522e+06	4564	27.9	7.16	1260178	586031	105156	305587	175288	241205	0.77	/	53.5
p003-bdf1_004	progenitor-2	5043425	15997596	2.88379e+06	5966	19.36	7.67	1430122	630492	116622	330980	182890	259329	0.741	/	55.91
p003-bdf1_005	iOSN	3554923	14150136	1.62178e+06	3275	35.37	5.14	2449150	1315659	160608	415509	739542	528072	6.023	/	46.28
p003-bdf1_006	progenitor-2	3606009	19796965	1.56128e+06	3757	16.86	8.29	2465052	1018056	179247	486573	352236	446793	0.5	/	58.7
p003-bdf1_007	progenitor-2	4333442	21263870	2.43858e+06	4976	19.9	5.21	2704618	1088062	201816	547571	338675	493284	0.434	/	59.77
p003-bdf1_008	iOSN	4557787	18337526	2.15729e+06	3828	11.54	6.59	2459459	986909	179678	514208	293023	436374	5.894	/	59.87
p003-bdf1_009	progenitor-1	4537814	13115981	2.33981e+06	5517	20.17	4.87	2182538	954795	199862	402423	352510	432272	6.685	/	56.25
p003-bdf1_010	progenitor-2	4299302	15653120	1.98042e+06	5190	19.82	6.19	2782415	1224068	247040	617001	360027	510019	12.857	/	56.01
p003-bdf1_011	progenitor-2	3902626	18932881	1.57104e+06	6019	21.88	8.14	2864149	1078934	178805	420516	479613	519195	7.055	/	62.33
p003-bdf1_012	progenitor-2	3266483	22963402	1.64533e+06	5029	17.77	12.5	2447089	1054407	166815	576791	310801	482061	4.819	/	56.91
p003-bdf1_013	progenitor-1	3222120	18021779	1.4926e+06	4076	34.96	3.31	3725510	1377860	323959	582175	471726	676019	8.55	/	63.02
p003-bdf1_014	progenitor-2	2422318	23023566	944741	3855	17.88	7.81	3827832	1405876	213234	727946	464696	685124	0.357	/	63.27
p003-bdf1_015	progenitor-2	4543032	15094992	2.38376e+06	2455	25.59	9.36	3259731	1301813	214523	725659	361631	592683	12.475	/	60.06
p003-bdf1_016	iOSN	3988843	18129828	2.13303e+06	5466	19.98	3.83	3649937	1475141	401426	618657	455058	626447	0.589	/	59.58
p003-bdf1_017	progenitor-2	3280059	17709620	1.38614e+06	4001	22.89	4.74	3523818	1277800	259805	624536	393459	587647	0.455	/	63.74
p003-bdf1_018	progenitor-1	3331228	19390887	1.21355e+06	3834	22.06	3.35	2807899	874935	154033	359151	361751	415183	7.967	/	68.84
p003-bdf1_019	progenitor-2	2853861	18399853	1.28714e+06	4678	19.51	5.86	2413784	999793	177165	524273	298355	449156	0.395	/	58.58
p003-bdf1_020	progenitor-2	4034327	17366710	1.71697e+06	3308	26.63	8.41	3308769	1357074	197715	750803	408556	649874	0.384	/	58.99
p003-bdf1_021	progenitor-2	5256780	12803886	2.52045e+06	4065	15.48	9.61	1877166	963670	178480	525831	259359	442043	0.443	/	48.66
p003-bdf1_022	progenitor-1	3308054	16107452	733960	2382	19.2	1.8	3075190	1069701	183999	459450	426252	506038	13.275	/	65.22
p003-bdf1_023	progenitor-2	4409031	15105837	2.20877e+06	4759	19.08	9.11	2872682	1149875	175843	630171	343861	545426	0.598	/	59.97
p003-bdf1_024	progenitor-2	3298328	14654535	1.0303e+06	2478	34.73	5.48	1530268	750112	141254	405518	203340	293628	16.406	/	50.98
p003-bdf1_025	iOSN	4121222	14936560	1.55812e+06	4109	21.78	3.56	2343018	1034514	253815	448032	332667	459298	0.682	/	55.85
p003-bdf1_026	iOSN	4808850	20182247	2.20348e+06	3587	19.86	6.72	3446487	1203282	320301	617720	265261	523121	0.664	/	65.09
p003-bdf1_027	progenitor-2	4346683	19860912	2.00202e+06	3202	16.56	14.21	2286955	978363	167717	556076	254570	464238	0.537	/	57.22
p003-bdf1_028	progenitor-2	3503827	8985459	617993	1767	33.76	3.29	607867	222352	41464	89484	91404	122925	41.574	/	63.42
p003-bdf1_029	progenitor-2	4068269	13755383	1.57059e+06	2903	35.06	7.04	2131511	915610	173720	548579	193311	424729	17.763	/	57.04
p003-bdf1_030	mOSN	5378362	21661197	2.95853e+06	4715	24	4.13	3066226	1538350	359627	785126	393597	655345	4.987	0.463	49.83
p003-bdf1_031	progenitor-2	5147686	18026507	2.60997e+06	4471	15.18	8.05	3013757	1098822	190812	656257	251753	496842	0.457	/	63.54
p003-bdf1_032	progenitor-2	3637711	7404	2.26513e+06	5347	15.36	3.82	771	734	149	317	268	100			4.8
p003-bdf1_033	iOSN	2820251	19733173	1.87383e+06	7160	17.73	5.91	2138575	984190	164644	401231	418315	424493	6.276	/	53.98
p003-bdf1_034	progenitor-1	3587520	13535196	2.41313e+06	6606	8.96	8.52	1418974	652559	108475	255959	288125	247817	14.38	/	54.01
p003-bdf1_035	mOSN	3539852	12687633	2.4001e+06	7932	7.9	2.09	2278152	812294	159707	316980	335607	361891	0.57	/	64.34
p003-bdf1_036	mOSN	3847728	13446546	2.55802e+06	8423	9.32	2.52	1901389	1120420	210309	449541	460570	462033	0.404	/	41.07
p003-bdf1_037	progenitor-2	3395614	17466397	2.15236e+06	5207	17.67	7.1	1469176	687677	131400	359772	196505	290780	0.568	/	53.19
p003-bdf1_038	iOSN	3821894	15430679	2.33523e+06	7071	12.6	3.55	1319591	671956	159279	259696	252981	286315	0.746	/	49.08
p003-bdf1_039	iOSN	3847187	13532438	2.53654e+06	7567	8.17	1.48	2030293	901238	155366	318554	427318	442902	0.754	/	55.61
p003-bdf1_040	progenitor-2	2824919	15617265	1.91812e+06	5981	14.1	8.81	403984	236082	87807	92762	55513	53085	41.023	/	41.56
p003-bdf1_041	iOSN	2819622	17279400	1.61692e+06	6352	13.01	4.47	2055360	949775	224669	349108	375998	423476	0.536	/	53.79
p007-bc_001	iOSN	4323784	34987646	2.56787e+06	8661	9.4	2.32	6951458	696850	130546	203057	363247	526068	16.429	/	89.98
p007-bc_002	iOSN	5330598	38709443	3.52593e+06	10226	8.98	1.92	9338691	802491	196668	289242	316581	630676	0.331	/	91.41
p007-bc_003	iOSN	4491069	39686412	2.33522e+06	6807	9.28	2.6	8987872	797220	219524	280817	296879	626395	0.693	/	91.13
p007-bc_004	progenitor-2	5346704	12751472	3.03554e+06	7487	10.45	2.75	1898765	643977	143958	233558	266461	462037	14.716	/	66.08
p007-bc_005	progenitor-2	4756616	35281003	3.09569e+06	9720	10.38	2.27	5877171	576594	136860	272427	167307	441049	2.124	/	90.19
p007-bc_006	progenitor-2	4804527	44130747	2.92707e+06	8140	9.63	3.69	7824046	719024	160584	310490	247950	561403	12.672	1.14	90.81
p007-bc_007	mOSN	4729576	38458548	3.14605e+06	9375	10.86	1.79	7549746	741219	170447	253212	317560	553691	8.514	/	90.18
p007-bc_008	progenitor-2	4282337	12627061	2.70305e+06	8652	9.63	3.92	2441028	953534	103659	175154	674721	440307	15.767	/	60.94
p007-bc_009	iOSN	4273288	41690509	2.61301e+06	7035	8.88	2.45	8589650	737448	191097	292174	254177	573925	0.443	/	91.41
p007-bc_010	mOSN	5226633	30527566	3.05452e+06	7500	8.06	1.28	8174412	771727	185738	293796	292193	607256	0.522	/	90.56
p007-bc_011	mOSN	5179330	79377871	2.74835e+06	6626	6.77	1.15	6773869	647050	136101	195684	315265	522120	2.594	/	90.45
p007-bc_012	progenitor-2	4991445	26086367	3.34201e+06	9682	12.67	2.38	6692111	2806790	476540	938273	1391977	1842724	6.902	/	58.06
p007-bc_013	progenitor-2	4251213	19601143	2.6786e+06	8604	10.1	2.54	2534023	628498	148858	304688	174952	485789	2.073	/	75.2
p007-bc_014	progenitor-2	4700168	20998493	2.97548e+06	7311	11.98	3.61	3522843	541667	132134	232437	177096	437112	0.531	/	84.62
p007-bc_015	progenitor-2	4091683	26094086	2.74559e+06	8373	7.03	3.18	3336526	841719	195914	446719	199086	673241	0.341	/	74.77
p007-bc_016	progenitor-2	3513408	19117672	1.99762e+06	4845	10.19	4.32	2766600	445823	104977	224529	116317	347531	8.334	/	83.89
p007-bc_017	mOSN	3833825	19309523	2.64909e+06	8259	8.73	1.48	4148056	615996	152657	235156	228183	495533	0.404	/	85.15
p007-bc_018	progenitor-2	3403201	21999580	2.22673e+06	8069	6.25	3.16	4404837	950958	231176	390961	328821	740719	4.454	1.073	78.41
p007-bc_019	progenitor-2	3553542	27317604	2.3986e+06	8355	10.79	2.7	3593171	496297	137420	233213	125664	389387	0.64	/	86.19
p007-bc_020	iOSN	3713141	18846521	2.02036e+06	6626	7.55	1.48	4419950	621415	153479	214743	253193	501230	0.464	/	85.94
p007-bdf1_001	progenitor-1	1892639	13478897	1.01898e+06	4112	6.18	2.44	1194819	735976	181396	380618	173962	260642	0.844	/	38.4
p007-bdf1_002	progenitor-2	1922662	16524239	912217	2324	9.2	2.62	1202239	576491	179082	246025	151384	220489	1.263	/	52.05
p007-bdf1_003	progenitor-2	2126723	14875609	1.29753e+06	3925	8.33	1.84	1007167	529415	170817	217997	140601	197711	1.974	/	47.44
p007-bdf1_004	mOSN	2286021	13426913	1.36594e+06	3946	6.06	0.64	1187030	595589	121903	207322	266364	282470	1.106	/	49.83
p007-bdf1_005	progenitor-2	2143842	13817267	947752	2374	11.69	0.92	1220572	563891	140368	238502	185021	234053	17.72	/	53.8
p007-bdf1_006	iOSN	2033000	16895394	1.14223e+06	4019	4.32	1.17	2039402	894444	250482	284859	359103	409225	0.603	/	56.14
p007-bdf1_007	mOSN	1908888	15045735	964361	3627	8.68	0.83	785205	355731	84488	153116	118127	134921	17.264	/	54.7
p007-bdf1_008	iOSN	2957105	12334693	1.65277e+06	4132	6.85	0.67	891019	423184	96255	154788	172141	182808	1.458	/	52.51
p007-bdf1_009	mOSN	2658630	13231089	1.62131e+06	5249	3.39	0.62	1328773	590896	142713	214532	233651	262315	1.025	/	55.53
p007-bdf1_010	iOSN	2054480	20546040	654839	3844	5.07	1.7	2435391	893222	232216	319383	341623	396446	0.685	/	63.32
p007-bdf1_011	progenitor-1	2552219	13220913	1.49487e+06	4503	10.97	3.21	484601	255079	65418	125934	63727	89360	22.191	/	47.36
p007-bdf1_012	progenitor-1	2236483	12061339	998177	1456	4.45	1.85	1321659	749206	191221	422583	135402	293305	0.814	/	43.31
p007-bdf1_013	progenitor-2	2537994	18060465	1.56574e+06	3419	8.88	2.1	1084119	437972	98950	176710	162312	167820	1.329	/	59.6
p007-bdf1_014	progenitor-1	2213964	21973778	1.05062e+06	2017	3.52	2.54	1616243	815989	216762	458034	141193	309972	12.025	/	49.51
p007-bdf1_015	progenitor-2	2403812	17738942	1.59332e+06	4487	8.73	2.4	1027847	571722	177155	312196	82371	190615	19.508	/	44.38
p007-bdf1_016	progenitor-1	2009430	21752617	574568	3160	9.34	1.63	451113	279795	64385	144180	71230	92153	9.548	/	37.98
p007-bdf1_017	progenitor-2	2157432	18135089	1.27627e+06	4102	7.77	2.31	1874140	890808	237384	459775	193649	356222	12.115	/	52.47
p007-bdf1_018	iOSN	1888093	21609894	286365	722	39.13	4.02	1351351	485826	134394	221069	130363	184037	13.907	/	64.05
p007-bdf1_019	iOSN	2444675	13366897	1.3753e+06	2673	8.72	2.56	1196083	536767	140829	257295	138643	223881	1.037	/	55.12
p007-bdf1_020	iOSN	1981887	14520032	895779	1817	13.67	1.85	1079735	316270	57625	119851	138794	115964	1.384	/	70.71
p007-bdf1_021	iOSN	3103434	19687855	1.73722e+06	2933	8.69	1.58	2346826	793983	242523	329469	221991	318699	0.825	/	66.17
p007-bdf1_022	progenitor-2	2901278	13967787	1.59688e+06	2408	10.72	0.85	1504413	698426	207730	340936	149760	280240	13.049	/	53.57
p007-bdf1_023	progenitor-2	2864356	11917512	1.92081e+06	3446	9.38	2.92	861251	428861	105866	250447	72548	163722	1.412	/	50.2
p007-bdf1_024	progenitor-2	2663787	12514382	1.54891e+06	3420	9.9	0.76	1099136	543004	154480	259742	128782	211789	3.937	/	50.6
p007-bdf1_025	progenitor-1	2522393	10927135	1.48655e+06	2796	7.58	1.83	700415	394196	101767	203213	89216	152960	15.64	/	43.72
p007-bdf1_026	progenitor-2	1258371	16858364	611552	3614	8.87	1.38	1013633	540909	163221	274213	103475	183936	17.82	/	46.64
p007-bdf1_027	progenitor-2	2432110	12367901	1.45334e+06	2937	16.97	0.99	1209527	536413	181395	228774	126244	214913	19.41	/	55.65
p007-bdf1_028	progenitor-2	2845700	21092232	1.69122e+06	2935	10.84	1.29	1862589	946726	221578	380789	344359	337406	11.623	/	49.17
p007-bdf1_029	progenitor-2	2847171	14086430	1.709e+06	2412	10.36	1.05	1174058	515697	170504	230907	114286	181088	1.423	/	56.08
p007-bdf1_030	progenitor-1	2040843	17488470	1.05859e+06	2344	12.21	2.59	929326	407473	108205	218981	80287	149573	21.49	/	56.15
p007-bdf1_031	progenitor-2	2385991	9235244	1145766	1358	16.62	2.37	696214	413144	138462	191883	82799	149452	1.339	/	40.66
p007-bdf1_032	progenitor-1	2473130	15031405	1.21467e+06	1952	15.72	1.5	1391243	576592	169062	256807	150723	234594	2.299	1.007	58.56
p007-bdf1_033	progenitor-2	2549139	15998620	1.1e+06	1560	16.3	1.47	1231658	528155	154074	243219	130862	213717	10.193	/	57.12
p007-bdf1_034	progenitor-2	2721732	13576726	1.33189e+06	2473	10.98	2.06	614165	348973	121706	154761	72506	112746	2.677	/	43.18
p007-bdf1_035	progenitor-2	2630092	18027491	1.82234e+06	3596	11.25	2.97	884093	424857	127431	218070	79356	147484	12.607	/	51.94
p007-bdf1_036	progenitor-2	2519238	14092987	1.40574e+06	2608	21.03	2.3	629003	333671	96378	169606	67687	119519	24.021	/	46.95
p007-bdf1_037	progenitor-2	2238546	14350312	1.42119e+06	2828	6.56	1.5	655894	341841	103186	179308	59347	114389	22.594	/	47.88
p007-bdf1_038	progenitor-2	2406571	6847496	1.43252e+06	2726	13.38	1.32	306422	199390	60132	100505	38753	67473	27.532	/	34.93
p007-bdf1_039	mOSN	2481951	14817996	1.59667e+06	3965	8.77	0.97	574078	306962	88173	146919	71870	108461	12.069	/	46.53
p007-bdf1_040	iOSN	2241490	6946522	1.45194e+06	2574	13.13	2.94	463915	296635	89010	106701	100924	126011	1.441	/	36.06
p007-bdf1_041	mOSN	2882130	5193148	1.976e+06	2717	7.66	0.65	403314	266117	80891	96462	88764	109351	2.128	/	34.02
p007-bdf1_042	iOSN	2785798	16935580	1.46925e+06	5868	6.58	1.43	1105286	473226	147792	183770	141664	190341	1.4	/	57.19
p007-bdf1_043	progenitor-2	2383279	6734917	1.53426e+06	5245	11.44	1.27	363455	233170	72729	116167	44274	80810	26.532	/	35.85
p007-bdf1_044	progenitor-2	2392361	17338233	1.40039e+06	4565	14.71	4.22	622722	331847	84298	184656	62893	101037	8.175	/	46.71
p007-bdf1_045	progenitor-1	3392523	13987958	1.5601e+06	4488	14.3	4.2	1795486	808406	250259	419005	139142	304029	12.498	1.213	54.98
p007-bdf1_046	iOSN	3293837	15310002	1.7597e+06	4702	8.8	5.44	1106221	496138	123506	217159	155473	191353	2.829	1.063	55.15
p007-bdf1_047	iOSN	3506583	14215719	2.21666e+06	5966	7.41	2.75	786786	321634	76881	126325	118428	109459	2.497	/	59.12
p007-bdf1_048	iOSN	3555041	10536533	2.16047e+06	6876	8.38	2.69	1594526	776429	257388	334058	184983	291781	1.907	1.256	51.31
p007-bdf1_049	progenitor-2	3594348	14987354	2.01501e+06	5649	12.57	7.67	2024832	773504	199787	365590	208127	318956	0.797	/	61.8
p007-bdf1_050	iOSN	3640729	15829351	1.97944e+06	7488	17.62	3.16	2238966	926411	217616	307761	401034	416273	3.774	/	58.62
p007-bdf1_051	progenitor-1	2693723	19242283	1.32517e+06	4446	13.25	6.37	1708377	747130	211053	312443	223634	290031	0.744	/	56.27
p007-bdf1_052	iOSN	2935651	15254913	1.64169e+06	6005	7.84	2.95	1623672	766614	223670	319121	223823	300274	1.113	/	52.79
p007-bdf1_053	iOSN	3088563	16878524	1.69971e+06	4631	11.02	4.42	1569030	690312	174762	303125	212425	279211	0.833	/	56
p007-bdf1_054	iOSN	3015236	13835903	1.67076e+06	7880	15.19	4.08	1732483	828897	262151	303299	263447	331068	1.362	/	52.16
p007-bdf1_055	iOSN	3081911	12259178	1.76418e+06	6457	12.53	3.47	1795241	645289	188844	243916	212529	255337	0.995	/	64.06
p007-bdf1_056	progenitor-2	2582901	12799502	1.10597e+06	6089	15.86	4.44	1783235	697795	175396	311640	210759	295499	0.67	/	60.87
p007-bdf1_057	progenitor-2	3135646	10951596	1.59471e+06	5537	12.07	3.61	2070180	799559	216306	405528	177725	331010	10.164	/	61.38
p007-bdf1_058	iOSN	3271880	16060391	1.798e+06	5932	10.57	3.69	2198815	913917	270990	349712	293215	380355	0.969	/	58.44
p007-bdf1_059	iOSN	3165974	18333294	1608171	4782	10.42	3.75	2247503	881831	236287	359113	286431	374129	2.252	1.415	60.76
p007-bdf1_060	progenitor-1	2736514	12108382	1.36383e+06	6590	19.95	3.13	1575995	672794	171855	281679	219260	263461	13.698	/	57.31
p007-bdf1_061	mOSN	4283340	15807196	2.5124e+06	5980	8.04	1.63	1475368	616116	185386	254385	176345	223695	1.278	/	58.24
p007-bdf1_062	progenitor-2	4097387	15268229	2.5477e+06	6689	8.97	6.35	1655087	690886	174357	378040	138489	254261	1.263	/	58.26
p007-bdf1_063	iOSN	3442527	20289799	1.57944e+06	4008	16.7	4.95	994592	479726	106488	235963	137275	168021	24.456	/	51.77
p007-bdf1_064	progenitor-2	3806798	17349227	2.41659e+06	10627	10.63	4.53	1887300	1039276	218054	410566	410656	360014	0.544	/	44.93
p007-bdf1_065	iOSN	4691916	12126926	2.55939e+06	5333	16.23	4.36	1620384	758973	195698	310062	253213	319990	0.732	/	53.16
p007-bdf1_066	iOSN	4731870	11509494	2.82623e+06	6988	15.18	4.87	1647381	813232	208063	371507	233662	338366	0.698	/	50.63
p007-bdf1_067	progenitor-1	3621879	12941080	2.00574e+06	6816	11.1	4.35	1999842	777232	192272	387897	197063	311147	1.061	/	61.14
p007-bdf1_068	progenitor-1	3740496	13697124	2262520	8303	15.79	3.53	1490314	666099	180982	311278	173839	250208	1.014	/	55.3
p007-bdf1_069	iOSN	3825725	17413966	2.09286e+06	6781	10.71	3.31	2419927	1070958	267071	401605	402282	483113	0.644	/	55.74
p007-bdf1_070	progenitor-2	3633646	15955523	2.1695e+06	7877	17.28	4.63	1528997	781516	176229	356132	249155	274945	13.062	0.82	48.89
p007-bdf1_071	progenitor-2	3483168	14273360	1.87462e+06	4769	9.54	5.76	1343588	613392	137026	306493	169873	242892	1.279	/	54.35
p007-bdf1_072	progenitor-1	3791132	14931030	2.00812e+06	5166	15.86	5.8	1415821	638836	141274	269922	227640	249165	0.711	/	54.88
p007-bdf1_073	progenitor-2	4414331	19395371	2.74179e+06	6578	12.01	7.74	1576274	686455	163768	358956	163731	269414	0.891	/	56.45
p007-bdf1_074	progenitor-2	4466287	16793177	2.79429e+06	6469	12.56	6.88	1814260	1019940	285523	509163	225254	398145	0.672	/	43.78
p007-bdf1_075	iOSN	4119120	20159899	2.33643e+06	5641	13.91	4.54	1569480	726541	195518	331994	199029	285809	0.872	/	53.71
p007-bdf1_076	iOSN	3854889	21258719	1.9788e+06	5480	9.05	2.94	1287900	562410	137809	217390	207211	217308	1.398	/	56.33
p007-bdf1_077	progenitor-2	3957461	15234195	2.29493e+06	6141	13.06	8.51	1616347	775451	178324	395219	201908	320080	1.134	/	52.02
p007-bdf1_078	progenitor-2	3671385	20110036	2.13408e+06	7132	11.1	5.2	1379586	663444	155322	335356	172766	262356	0.762	/	51.91
p007-bdf1_079	progenitor-2	3788301	18296853	1.79607e+06	5647	10.88	4.98	2400947	1032447	247137	535479	249831	449865	0.553	/	57
p007-bdf1_080	progenitor-2	3547994	13221110	1.97045e+06	6665	9.77	5.79	1572100	687895	133566	367622	186707	299563	5.483	0.734	56.24
p007-bdf1_081	progenitor-2	3886930	13562000	2.14123e+06	9250	13.34	6.3	2066713	934718	189587	372637	372494	310710	11.192	/	54.77
p014-bc_001	mOSN	2633322	23585075	1.69924e+06	9116	15.73	3.44	1743430	392940	76079	90317	226544	237512	1.616	1.315	77.46
p014-bc_002	iOSN	2432101	18038778	1.25994e+06	6090	22.91	2.93	1730235	298001	70273	98385	129343	207137	1.166	/	82.78
p014-bc_003	mOSN	2856399	18843533	1.79688e+06	7973	23.6	2.02	2036977	300241	68519	77447	154275	214380	10.042	0.958	85.26
p014-bc_004	iOSN	2327069	11886191	1.35475e+06	7444	27.43	2.81	1048708	204724	42560	70870	91294	140024	12.891	1.327	80.48
p014-bc_005	mOSN	2015934	17986119	1.14267e+06	4602	21.96	2.31	1335513	226936	51821	77182	97933	160126	2.175	1.275	83.01
p014-bc_006	mOSN	3189479	11823652	1.95906e+06	7883	21.54	1.77	948412	146442	29247	39345	77850	102312	10.305	/	84.56
p014-bc_007	iOSN	2384605	8341970	1.26483e+06	4193	14.5	2.95	709058	145625	36628	47681	61316	94715	3.323	/	79.46
p014-bc_008	mOSN	2293807	23699600	1.35569e+06	5028	11.21	1.94	2234397	417215	96079	127732	193404	304577	0.813	/	81.33
p014-bc_009	mOSN	2417386	21648708	1.4986e+06	5407	21.54	1.72	1548694	293145	68266	106794	118085	208094	2.53	/	81.07
p014-bc_010	mOSN	2487726	14505450	1.54557e+06	5551	12.39	1.62	1711890	267713	51423	85179	131111	194230	0.902	/	84.36
p014-bc_011	iOSN	3226819	17067732	2.02781e+06	7897	27	2.64	1432082	217051	48838	64174	104039	163270	1.203	/	84.84
p014-bc_012	mOSN	3124442	11254365	2.06717e+06	7778	21.59	1.66	533711	235408	43843	66042	125523	135874	16.426	/	55.89
p014-bc_013	progenitor-2	2077375	10615584	1.33793e+06	6450	20.98	5.57	473406	177482	38090	63036	76356	111354	9.192	/	62.51
p014-bc_014	progenitor-2	2310468	13986180	1.50484e+06	8050	27.91	2.41	763215	290303	56460	102305	131538	183130	18.649	/	61.96
p014-bc_015	iOSN	2396461	12011848	1.34924e+06	4463	23.68	3.29	610900	239874	45263	72581	122030	157710	1.262	/	60.73
p014-bc_016	mOSN	2232163	7686411	1.26353e+06	4274	24.05	2.1	294312	118958	25092	33745	60121	71404	34.028	/	59.58
p014-bc_017	mOSN	3025708	6689311	1.9005e+06	7116	23.89	1.82	354937	133235	25576	33739	73920	80860	19.353	/	62.46
p014-bc_018	iOSN	3367967	10913112	2.22228e+06	8950	22.49	4.04	453202	225627	43075	82396	100156	131298	10.895	/	50.21
p014-bc_019	iOSN	2811216	10845945	1.76707e+06	7592	16.86	2.42	463122	233700	51979	60476	121245	132272	10.049	/	49.54
p014-bc_020	mOSN	1524326	9538836	618496	4387	29.65	3.06	437270	198579	43394	57764	97421	116469	1.557	1.271	54.59
p014-bc_021	mOSN	3578243	9150654	2.126e+06	5928	10.45	1.86	489684	202528	40529	52184	109815	122562	1.626	/	58.64
p014-bc_022	iOSN	3123329	8447285	1.84823e+06	6151	17.2	3.79	471902	181618	35022	49422	97174	113389	1.485	/	61.51
p014-bc_023	mOSN	3316296	6905157	2.05122e+06	7002	15.74	2.21	316514	128377	26079	35761	66537	79144	4.198	/	59.44
p014-bc_024	mOSN	2861400	14078801	1.76526e+06	6840	13.42	1.82	1315864	437646	83829	121285	232532	259885	1.397	/	66.74
p014-bc_025	iOSN	4014453	16965412	1.95172e+06	7336	19.5	2.01	1635643	457633	103374	152241	202018	303061	0.912	/	72.02
p014-bc_026	mOSN	5923328	14206473	3.98654e+06	6149	14.27	2.04	1254092	377123	85143	111166	180814	245923	1.431	/	69.93
p014-bc_027	iOSN	4954535	17883492	3.14455e+06	6511	12.77	2.2	1393253	421988	88991	135501	197496	277735	0.978	/	69.71
p014-bc_028	iOSN	4382957	21541780	2.43583e+06	6277	16.44	4.43	1866865	527106	115938	175449	235719	364858	0.678	/	71.77
p014-bc_029	iOSN	4545541	18006651	2.69654e+06	5862	15.65	3.09	1457715	437966	104015	170190	163761	295021	1.025	/	69.96
p014-bc_030	iOSN	5222140	13319320	3.41672e+06	9185	32.89	1.97	549299	265367	53552	86879	124936	155618	22.528	/	51.69
p014-bc_031	mOSN	5470942	19142185	3.61698e+06	6658	18.19	1.63	1792415	444312	102548	138848	202916	313449	0.652	/	75.21
p014-bc_032	progenitor-2	5647468	16008429	4.01797e+06	6373	18.07	2.4	1312539	422572	96068	157787	168717	281222	18.159	/	67.8
p014-bc_033	progenitor-2	1273956	9156808	29825.3	918	8.78	1.83	350968	179977	34460	50600	94917	109223	3.232	1.284	48.72
p014-bc_034	iOSN	5269476	8640851	3.3884e+06	7956	29.46	2.89	422504	187302	37338	54472	95492	113679	1.475	/	55.67
p014-bc_035	iOSN	5125176	8221565	3.35371e+06	7803	20.48	3.26	395745	174305	34380	52716	87209	102006	11.015	/	55.96
p014-bc_036	iOSN	4355897	12610443	2.847e+06	6848	21.51	4.01	646224	259928	50247	77151	132530	143883	22.534	/	59.78
p014-bc_037	mOSN	4973955	12539789	3.26539e+06	8312	26.18	2.13	744566	338221	68420	83158	186643	193787	10.744	/	54.57
p014-bc_038	mOSN	4045033	7322818	2.60327e+06	5978	26.58	1.81	317214	151997	33036	48310	70651	89708	20.267	/	52.08
p014-bc_039	iOSN	5315956	13642870	3.61805e+06	9266	27.03	2.56	699366	388181	86031	154441	147709	239532	12.478	/	44.5
p014-bc_040	iOSN	4599670	7326603	2.86056e+06	5964	20.49	2.57	367473	196605	48715	55508	92382	123463	1.784	/	46.5
p014-bc_041	progenitor-2	2156962	8903076	920434	5808	17.66	3.68	392683	176525	36958	66656	72911	107685	16.459	/	55.05
p014-bc_042	iOSN	4436763	8271831	2.86138e+06	6200	19.61	2.24	389760	161088	33946	48228	78914	99254	12.76	/	58.67
p014-bc_043	iOSN	5024088	5900701	3.47251e+06	8392	18.86	4.37	309287	133477	35866	48525	49086	80292	28.35	/	56.84
p014-bdf1_001	unknown	2824780	12485688	1.60982e+06	3422	18.19	6.41	1449700	518451	116751	275205	126495	175246	2.009	/	64.24
p014-bdf1_002	progenitor-1	2107928	12799448	946229	1914	26.13	3.33	1554052	675228	146504	342159	186565	272985	10.043	/	56.55
p014-bdf1_003	mOSN	1514464	14987614	660988	1466	59.67	1.21	1888186	938283	177113	390076	371094	385077	13.319	/	50.31
p014-bdf1_004	progenitor-2	1398317	13159148	515199	2888	20.24	3.93	1493586	749076	159776	440824	148476	281823	0.753	/	49.85
p014-bdf1_005	iOSN	2142591	14130588	1.12284e+06	2849	35.93	3.32	1861054	776147	175742	312750	287655	318352	0.729	/	58.3
p014-bdf1_006	unknown	2361678	19133541	1.29321e+06	4490	15.77	5.68	1982546	827710	187610	434122	205978	315015	0.684	/	58.25
p014-bdf1_007	progenitor-2	1853912	13857395	1.04671e+06	2814	34.78	12.61	1882890	1086699	142772	363061	580866	291242	1.446	/	42.29
p014-bdf1_008	unknown	2445474	13654958	1.37244e+06	4345	14.28	7.2	1290811	583237	127691	310990	144556	205506	0.981	/	54.82
p014-bdf1_009	unknown	2581573	12734421	1.49933e+06	4089	17.63	6.73	1206442	521940	115595	275723	130622	188319	1.045	/	56.74
p014-bdf1_010	progenitor-1	2385893	23249258	1.21468e+06	2739	30.88	7.12	2406413	1120185	226738	528036	365411	419549	6.776	0.77	53.45
p014-bdf1_011	unknown	2540421	12505752	1.492e+06	3949	13.74	7.86	1530614	452272	67736	241122	143414	163293	1.068	/	70.45
p014-bdf1_012	iOSN	1835496	17825107	991558	4491	33.63	2.65	1977451	1051061	221460	511948	317653	397331	9.169	0.531	46.85
p014-bdf1_013	iOSN	2516903	16933754	1.44069e+06	3117	30.82	2.8	1998980	526528	115723	233532	177273	185121	1.139	/	73.66
p014-bdf1_014	iOSN	2189387	16306661	1.26457e+06	3009	42.14	3.44	2076841	769504	156295	377614	235595	300552	0.688	/	62.95
p014-bdf1_015	unknown	2070487	16436804	1.14385e+06	3213	27.43	5.42	1041146	560932	113433	280852	166647	209161	16.393	/	46.12
p014-bdf1_016	mOSN	2018205	15380187	744677	770	69.55	1.96	1327965	694596	158130	385103	151363	267563	15.172	/	47.69
p014-bdf1_017	progenitor-1	2102209	14194919	1.00481e+06	2565	17.94	13.01	1094726	597754	144795	320020	132939	221606	1.622	1.366	45.4
p014-bdf1_018	mOSN	1917623	13424242	645660	1060	56.68	0.97	1230158	679197	145874	360900	172423	280418	12.306	/	44.79
p014-bdf1_019	progenitor-2	1924525	13902523	974104	2141	42.58	1.79	1279542	850623	135492	328859	386272	301380	10.131	/	33.52
p014-bdf1_020	mOSN	1654986	11601781	569536	657	66.33	1.34	1066994	279972	50185	97721	132066	87718	42.058	/	73.76
p014-bdf1_021	unknown	2538557	14942003	1.09274e+06	2333	36.24	4.51	1602729	875093	183391	436214	255488	356554	10.099	/	45.4
p014-bdf1_022	unknown	2177978	12651564	1.08344e+06	3272	26.93	4.38	1602467	861115	197102	479412	184601	346274	3.028	/	46.26
p014-bdf1_023	unknown	2757609	24953517	1.327e+06	4094	19.08	5.47	3633306	1316833	275947	742801	298085	543096	11.947	/	63.76
p014-bdf1_024	progenitor-1	1820740	18953220	666975	1462	43.79	1.91	2452638	722357	149032	319629	253696	351710	15.996	/	70.55
p014-bdf1_025	unknown	2345788	13641829	1.13438e+06	3987	23.85	6.93	1880620	1139180	251526	543942	343712	406708	14.444	/	39.43
p014-bdf1_026	unknown	2448475	14865019	1.23409e+06	4210	19.6	6.06	1518732	779928	183224	423270	173434	310910	0.831	/	48.65
p014-bdf1_027	progenitor-2	2343655	16098194	1.27876e+06	4196	13.29	3.82	2308435	1598632	334654	884140	379838	586795	9.955	/	30.75
p014-bdf1_028	progenitor-2	2298070	12667199	1.1378e+06	3171	38.54	2.73	1294648	741858	187201	417514	137143	289624	0.842	/	42.7
p014-bdf1_029	iOSN	2099897	14932057	1.14414e+06	4635	40.46	2.29	1971405	902912	216279	366491	320142	396501	0.855	/	54.2
p014-bdf1_030	unknown	2180799	17996613	1.03656e+06	3184	34.1	3.14	2416675	999385	242592	538254	218539	407962	11.82	/	58.65
p014-bdf1_031	mOSN	2135985	12226609	970428	1276	62.5	1.77	1429969	790727	164392	394753	231582	331720	0.69	/	44.7
p014-bdf1_032	unknown	2327737	15871693	1193396	3728	26.82	5.7	1856480	942353	226811	524712	190830	374147	0.658	/	49.24
p014-bdf1_033	progenitor-1	1797191	13271748	989013	2315	32.8	3.35	1850686	841697	199369	445227	197101	355124	0.873	/	54.52
p014-bdf1_034	unknown	1579470	17658320	894645	2928	37.06	2.6	1751044	864140	167086	430992	266062	346629	12.707	/	50.65
p014-bdf1_035	unknown	1793387	14932140	1.0112e+06	3496	18.3	6.4	1784526	930918	245423	490313	195182	363278	0.723	/	47.83
p014-bdf1_036	unknown	1958475	14174211	1.2684e+06	4153	19.66	6.29	1771583	877424	219856	471843	185725	336041	12.745	/	50.47
p014-bdf1_037	unknown	1991849	13941708	1.1808e+06	4207	21.58	3.6	1540139	803064	190142	441589	171333	312028	0.779	/	47.86
p014-bdf1_038	mOSN	1598437	15054775	827842	2669	49.59	1.82	2430883	1371635	265250	769984	336401	562676	12.11	/	43.57
p014-bdf1_039	progenitor-1	1578112	17351316	845267	1641	51.99	1.57	2405049	1403899	212728	568395	622776	479261	2.849	/	41.63
p014-bdf1_040	unknown	1891183	14170346	1.03225e+06	3919	17.58	9.72	1556488	826547	209427	430383	186737	330403	0.716	/	46.9
p014-bdf1_041	unknown	1949255	12157713	1.09178e+06	3941	29.07	4.22	1749876	896541	211075	493912	191554	358310	0.717	/	48.77
p014-bdf1_042	unknown	1806598	17147756	1.03232e+06	3823	17.45	4.97	1886390	925540	216643	505797	203100	371843	0.647	/	50.94
p014-bdf1_043	unknown	1741094	15390638	983774	3607	28.1	4.06	1503077	824013	171835	444033	208145	338656	0.647	/	45.18
p014-bdf1_044	progenitor-2	1479284	16565645	863308	3451	32.92	4.14	1508479	813944	163089	443351	207504	324668	0.703	/	46.04
p014-bdf1_045	unknown	1713139	30243304	839110	3005	21.26	4.46	2851273	1120987	261036	585353	274598	458201	0.615	/	60.68
p014-bdf1_046	progenitor-1	3594815	18081657	1.82221e+06	2931	28.05	1.46	1986172	902318	246898	430346	225074	354329	0.721	/	54.57
p014-bdf1_047	mOSN	3857313	16235391	2.39914e+06	7204	12.89	1.89	1826331	871017	160162	300587	410268	392701	7.147	/	52.31
p014-bdf1_048	iOSN	3165571	12123267	1.83795e+06	5019	12.28	3.67	1838669	899445	226620	397700	275125	375889	0.821	/	51.08
p014-bdf1_049	progenitor-1	2429971	14426193	1.32732e+06	5247	22.42	5.71	1403946	722114	155660	332201	234253	281376	0.901	/	48.57
p014-bdf1_050	progenitor-2	3158848	13842648	2.02229e+06	6942	21.39	3.49	1562136	748233	116852	417486	213895	326124	8.786	0.483	52.1
p014-bdf1_051	progenitor-2	3140408	13929066	2.24017e+06	7506	21.17	6.85	1541206	842784	172849	471822	198113	350728	0.546	/	45.32
p014-bdf1_052	mOSN	3012267	14690486	1.98273e+06	7082	20.23	1.88	1674284	820005	176965	295633	347407	366590	0.634	/	51.02
p014-bdf1_053	progenitor-1	3174049	14138925	2.09741e+06	7174	26.91	3.07	2098707	1388137	263880	618279	505978	458000	7.083	/	33.86
p014-bdf1_054	progenitor-2	3488046	19771077	2.11886e+06	3994	24.57	8.22	1741386	736537	190858	353045	192634	292346	0.76	/	57.7
p014-bdf1_055	progenitor-2	3561155	20923437	2.44918e+06	7342	17.58	5.75	1477513	673434	155738	347630	170066	256441	5.467	0.911	54.42
p028-bdf1_001	progenitor-2	2435687	17022911	1.31843e+06	2844	7.84	2.06	2005657	780977	219027	395028	166922	285584	0.951	/	61.06
p028-bdf1_002	progenitor-1	2235182	16946968	1.353e+06	2889	21.77	1.31	1850974	847674	251409	413917	182348	309234	0.974	/	54.2
p028-bdf1_003	progenitor-2	2233394	11847295	1.03517e+06	3377	16.15	2.93	1123532	613934	208404	299448	106082	201594	15.604	/	45.36
p028-bdf1_004	progenitor-1	1759559	12828747	594043	1488	35.61	0.76	1391030	692305	171429	309010	211866	260735	0.991	/	50.23
p028-bdf1_005	mOSN	1543489	12947362	472874	650	58.61	1	1485864	878428	146389	348249	383790	384189	6.613	/	40.88
p028-bdf1_006	mOSN	1284021	18508996	285230	524	55.54	1.76	1898908	801534	198839	361730	240965	311762	0.745	/	57.79
p028-bdf1_007	progenitor-1	2122971	17746047	1.1103e+06	2434	10.62	1.06	2077913	837519	272632	411390	153497	280056	1.265	/	59.69
p028-bdf1_008	iOSN	2446948	13805570	1.51284e+06	5004	7.31	1.07	1340599	669166	212433	287867	168866	226754	2.084	1.354	50.08
p028-bdf1_009	progenitor-2	2012031	14178043	1.1338e+06	4545	23.07	2.12	1584129	726462	220348	361501	144613	257343	4.218	1.189	54.14
p028-bdf1_010	progenitor-1	2314248	16531921	1.10298e+06	3257	10.84	1.12	1282360	618653	152154	284026	182473	208272	1.06	/	51.76
p028-bdf1_011	progenitor-1	1945205	16383636	996006	2301	26.29	1.36	1866986	778356	235078	379376	163902	267678	18.342	/	58.31
p028-bdf1_012	mOSN	2295563	20959290	1.35101e+06	3936	9.3	0.85	2114513	783833	244018	324552	215263	287048	1.445	/	62.93
p028-bdf1_013	mOSN	2067247	22188011	1.03147e+06	4357	16.5	1.08	2234741	752851	223787	275300	253764	246939	1.27	/	66.31
p028-bdf1_014	mOSN	2016884	22509481	1.17159e+06	3978	21.59	0.83	2891745	871283	277102	342116	252065	324238	1.411	/	69.87
p028-bdf1_015	progenitor-2	1698814	14693750	812624	3883	28.67	1.28	1733638	716975	225051	359678	132246	256101	5.72	/	58.64
p028-bdf1_016	mOSN	1729067	13726682	721499	3062	53.87	1.41	1394145	267303	57079	77114	133110	73129	17.971	/	80.83
p028-bdf1_017	progenitor-1	1873028	17707104	1.1035e+06	2756	15.1	0.91	2704060	796248	220319	399880	176049	302347	1.084	/	70.55
p028-bdf1_018	mOSN	1841846	18507800	1.16487e+06	3389	3.73	0.59	3123773	744669	104919	297769	341981	324984	10.246	/	76.16
p028-bdf1_019	progenitor-2	2210964	15550974	1.18846e+06	1943	7.41	1.61	2241307	803705	197881	386425	219399	326599	6.668	0.748	64.14
p028-bdf1_020	progenitor-2	1455915	18145893	327407	1076	29.43	1.5	3062492	674264	114383	174070	385811	296645	7.101	/	77.98
p028-bdf1_021	progenitor-2	2110643	12624667	1.27653e+06	2559	12.41	1.59	2027407	782030	200088	353441	228501	326882	0.745	/	61.43
p028-bdf1_022	progenitor-2	1767404	15474807	846633	1512	40.22	1.72	2267164	831817	262834	315852	253131	313721	1.036	/	63.31
p028-bdf1_023	progenitor-1	2309216	15156673	1.31839e+06	1950	4.53	2.33	2322378	597990	138532	254011	205447	226897	16.728	/	74.25
p028-bdf1_024	progenitor-1	1843877	15202260	769301	1871	17.81	1.15	2597085	900725	215984	375573	309168	385934	0.722	/	65.32
p028-bdf1_025	progenitor-1	2148457	19325670	1.19302e+06	2182	11.5	2.22	2770032	869654	258144	397789	213721	350589	0.814	/	68.6
p028-bdf1_026	progenitor-2	1877197	21350793	1.13892e+06	2441	7.46	1.17	3555698	807688	174913	382822	249953	340908	6.259	/	77.28
p028-bdf1_027	progenitor-2	2254163	19489626	1.24939e+06	1826	11	1.37	2436134	733438	199271	326331	207836	297074	1.074	/	69.89
p028-bdf1_028	mOSN	2209319	12843917	1.40875e+06	3066	10.39	0.98	1458706	727228	209508	275268	242452	274337	1.931	1.493	50.15
p028-bdf1_029	progenitor-2	2023828	15985027	1.15187e+06	1885	16.61	1.76	2463429	883575	191073	415029	277473	343605	0.654	/	64.13
p028-bdf1_030	iOSN	2390548	13017931	1.31964e+06	3271	4.8	1.31	2061783	857132	255866	328189	273077	338036	0.886	/	58.43
p028-bdf1_031	progenitor-2	2047184	18862362	1.38403e+06	3222	7.53	1.81	2984794	881686	223531	436744	221411	370264	0.861	/	70.46
p028-bdf1_032	mOSN	1984173	17332367	1.08986e+06	3142	7.1	0.9	2758587	843514	253312	314893	275309	344065	1.332	/	69.42
p028-bdf1_033	progenitor-1	1767393	18350565	873337	1800	6.74	2.66	2545378	837059	255589	363095	218375	332560	1.435	/	67.11
p028-bdf1_034	iOSN	2013048	18965021	1.35267e+06	4013	3.72	0.99	3033983	871759	260659	356267	254833	359782	0.952	/	71.27
p028-bdf1_035	progenitor-2	2525674	16372802	1.29131e+06	2105	6.09	1.91	2040107	576168	60757	222900	292511	221459	7.64	/	71.76
p028-bdf1_036	progenitor-2	2001583	14402917	1.26981e+06	5771	11.46	2.01	2122491	882684	205679	418940	258065	404947	0.557	/	58.41
p028-bdf1_037	mOSN	1867349	13496021	1.09279e+06	3873	10.88	1.7	1519490	748225	132543	238341	377341	339618	7.677	1.107	50.76
p028-bdf1_038	progenitor-2	2010048	14294213	1.00069e+06	5548	17.1	1.53	2099101	846903	166571	364662	315670	405073	0.542	/	59.65
p028-bdf1_039	mOSN	2284292	11480674	1.42161e+06	4321	7.06	1.52	1309121	645169	168847	209808	266514	274735	1.087	/	50.72
p028-bdf1_040	mOSN	2544466	13954444	1.5277e+06	5287	5.61	1.34	1466120	714231	145572	180670	387989	324971	2.358	0.748	51.28
p028-bdf1_041	mOSN	2333742	15101892	1.31384e+06	3868	11.97	2.08	1303938	653145	156957	223195	272993	293994	0.749	/	49.91
p028-bdf1_042	progenitor-2	2174013	13987573	1.49242e+06	5560	10.23	8.2	1268807	672006	172970	371262	127774	257406	1.243	/	47.04
p028-bdf1_043	mOSN	2086464	14337771	1.14253e+06	3291	9.34	1.8	1096084	480364	90148	159744	230472	206684	6.56	/	56.17
p028-bdf1_044	mOSN	1411679	11892341	788270	3599	8.43	1.74	1122921	592244	138998	206617	246629	262219	1.58	0.83	47.26
p028-bdf1_045	mOSN	2581593	12431009	1.41916e+06	3070	10.86	2.06	1267791	618105	140551	210753	266801	278341	1.671	/	51.25
p028-bdf1_046	progenitor-2	2634137	7609524	1.38079e+06	3774	12.55	3.69	891735	450013	98978	241807	109228	170179	7.281	/	49.54
p028-bdf1_047	mOSN	2700427	9719684	1.38028e+06	3888	6.41	1.63	1257967	590779	83037	198408	309334	283780	0.809	/	53.04
p028-bdf1_048	mOSN	2794119	11143714	1.5825e+06	3490	12.54	2.22	1028092	515052	125181	187414	202457	219298	6.429	/	49.9
p028-bdf1_049	progenitor-2	2704255	10795789	1.45497e+06	3305	10.99	4.52	1116906	522113	111590	263108	147415	206668	5.648	/	53.25
p028-bdf1_050	mOSN	2722177	9282531	1.52994e+06	3315	9.44	2.01	1060652	500592	114726	164278	221588	214155	1.289	/	52.8
p028-bdf1_051	iOSN	2602966	12987437	1.38072e+06	3961	12.02	2.93	1104891	549944	112507	190979	246458	240733	0.935	/	50.23
p028-bdf1_052	progenitor-1	2027708	7714575	936813	3593	9.72	6.83	1008234	522035	125101	221864	175070	191752	1.061	/	48.22
p028-bdf1_053	mOSN	2469654	10603051	1.49648e+06	4090	6.55	1.91	1257084	623213	146388	210284	266541	267150	4.253	1.387	50.42
p028-bdf1_054	mOSN	2719843	11241833	1.72195e+06	5083	9.53	1.77	1025491	545201	125508	199348	220345	225102	2.08	/	46.84
p028-bdf1_055	mOSN	1832517	10652936	1.05148e+06	5608	7.9	2.05	1451231	726730	177356	198147	351227	307940	0.74	/	49.92
p028-bdf1_056	mOSN	2820228	14533879	1.66858e+06	5349	11.01	2.04	1368016	692166	190391	245660	256115	277089	1.04	/	49.4
p028-bdf1_057	mOSN	2860530	12207814	1.8199e+06	6064	9.07	1.79	1430609	686127	151575	224563	309989	296698	0.898	/	52.04
p028-bdf1_058	mOSN	2276042	10763688	1.28063e+06	3176	9.85	2.03	1099711	580416	150737	203648	226031	235484	2.283	/	47.22
p028-bdf1_059	mOSN	2219958	8577269	1.40986e+06	4458	9.01	1.67	1744802	724985	136230	277038	311717	332590	1.019	/	58.45
p028-bdf1_060	progenitor-1	2170118	11121547	1.06738e+06	3983	10.71	1.93	1422075	743410	175820	312148	255442	294153	11.596	/	47.72
p028-bdf1_061	mOSN	2455371	15456895	1.44405e+06	3840	6.21	1.43	980176	531409	121847	193933	215629	228594	4.541	/	45.78
p028-bdf1_062	progenitor-2	2244403	11743684	1.16153e+06	3187	17.48	1.25	1348335	725127	126133	328993	270001	331931	0.588	/	46.22
p028-bdf1_063	mOSN	2281906	13199566	1.30014e+06	4700	9.03	1.66	1512783	685352	141268	242525	301559	289624	2.399	0.764	54.7
p028-bdf1_064	mOSN	2407022	14730285	1.38168e+06	4124	7.49	1.85	1004231	560051	129152	193208	237691	243749	4.962	/	44.23
p028-bdf1_065	mOSN	2533449	14529124	1.51647e+06	4444	9.9	1.73	1426084	720057	135097	232352	352608	336948	0.725	/	49.51
p028-bdf1_066	mOSN	2616914	15341370	1.65027e+06	5556	9.06	1.24	1710416	727684	83513	200244	443927	343319	2.238	/	57.46
p028-bdf1_067	mOSN	2325216	10850913	1.12071e+06	2504	15.99	1.68	1213267	601654	129674	209785	262195	263971	5.272	0.826	50.41
p028-bdf1_068	progenitor-1	2967771	15184375	1.46474e+06	2953	13.4	3.63	2609295	942626	193119	383737	365770	375352	3.993	/	63.87
p028-bdf1_069	mOSN	3430971	16333268	1.97543e+06	4565	5.94	1.4	2149933	888251	236080	309027	343144	380758	0.883	/	58.68
p028-bdf1_070	mOSN	3718155	18156481	2.16847e+06	5714	9.46	2.26	2289514	886312	240481	328703	317128	363628	1.013	/	61.29
p060-bdf1_001	mOSN	3900605	11703638	2.48861e+06	6536	8.77	1.66	1610170	936188	231866	296384	407938	360724	8.392	0.693	41.86
p060-bdf1_002	mOSN	4243468	11953310	2.41425e+06	3974	7.6	1.4	1520072	759450	211436	239725	308289	310804	3.326	/	50.04
p060-bdf1_003	progenitor-1	3289019	9754375	1.70653e+06	4253	12.19	7.12	1308232	607948	107606	273740	226602	236475	3.114	1.04	53.53
p060-bdf1_004	mOSN	3351982	10552114	426058	4488	5.82	1.6	1101965	599593	144851	226430	228312	252352	2.17	1.001	45.59
p060-bdf1_005	mOSN	3897027	8803333	2.12139e+06	5391	10.83	1.38	1696956	546008	91898	169214	284896	226507	1.309	/	67.82
p060-bdf1_006	mOSN	3266524	14005617	1.6467e+06	5635	7.07	1.87	2484337	961520	234444	336632	390444	449469	1.192	/	61.3
p060-bdf1_007	mOSN	3710624	11127745	1.7994e+06	4203	9.73	1.55	1470461	628455	139790	211929	276736	270150	2	/	57.26
p060-bdf1_008	mOSN	3935110	13440283	2.13115e+06	4513	18.08	1.08	1969193	800930	198027	286663	316240	340976	3.189	/	59.33
p060-bdf1_009	progenitor-1	3170266	13104248	1.0858e+06	4454	9.68	4.45	1209386	566809	62196	191037	313576	211851	1.569	1.264	53.13
p060-bdf1_010	progenitor-2	3571994	14817728	1.61167e+06	3864	19.51	5.4	1368885	661091	132364	323159	205568	283291	7.166	1.5	51.71
p060-bdf1_011	progenitor-1	3429857	11486581	792644	3067	15.7	4.56	1883039	775285	173477	349104	252704	331830	0.801	/	58.83
p060-bdf1_012	mOSN	3576016	13165687	1.74961e+06	4828	9.54	1.8	1755744	748257	165897	229441	352919	335129	0.727	/	57.38
p060-bdf1_013	iOSN	1581799	15229983	1.02503e+06	5714	4.33	2.65	1777751	622622	106957	172775	342890	251318	0.688	/	64.98
p060-bdf1_014	mOSN	1553673	18820707	996577	4662	6.02	1.64	1375290	495839	94107	137336	264396	168893	1.832	/	63.95
p060-bdf1_015	mOSN	1700337	17133374	1.06282e+06	4811	5.99	1.49	1430152	498681	87159	142520	269002	187908	1.444	/	65.13
p060-bdf1_016	mOSN	1612742	12893028	1.03335e+06	4983	8.63	1.53	1077968	332978	54918	98993	179067	111349	5.164	/	69.11
p060-bdf1_017	mOSN	1800039	13579348	1.17707e+06	4600	4.74	1.43	1050201	380557	60703	91601	228253	110149	4.358	/	63.76
p060-bdf1_018	mOSN	1802837	19486834	1.15514e+06	5452	12.36	1.31	1224159	426124	67816	132462	225846	172905	1.981	/	65.19
p060-bdf1_019	mOSN	1179931	18959233	563216	3608	7.26	2.38	772596	300615	42706	80339	177570	80108	8.325	/	61.09
p060-bdf1_020	mOSN	1523260	13727684	956817	4162	5.78	1.31	1376933	530858	100803	176528	253527	218090	1.183	/	61.45
p060-bdf1_021	iOSN	1529797	15870994	958965	4341	8.67	3.52	1573748	498591	110415	214027	174149	193154	1.26	/	68.32
p060-bdf1_022	mOSN	1438067	13106222	880346	3917	8.27	1.79	1225042	489698	92124	131870	265704	187225	2.778	/	60.03
p060-bdf1_023	mOSN	2503328	21029764	1.49264e+06	3640	5.34	1.47	1803796	407021	86367	127128	193526	124814	5.761	/	77.44
p060-bdf1_024	iOSN	2434949	21843483	1.58743e+06	5170	7.32	3.63	1465563	349309	70996	120594	157719	85818	18.734	/	76.17
p060-bdf1_025	mOSN	2610743	14060686	1.69034e+06	4601	4.46	1.1	1121109	319509	58274	82685	178550	92069	8.432	/	71.5
p060-bdf1_026	mOSN	2808874	17639155	1.7614e+06	4047	9.09	1.04	1930588	490264	101366	152769	236129	170680	2.75	/	74.61
p060-bdf1_027	mOSN	2743177	20638909	1.65248e+06	4629	8.89	1.65	2071984	441294	98812	123744	218738	113626	5.167	/	78.7
p060-bdf1_028	mOSN	2580140	16580438	1.55255e+06	4461	4.9	1.24	1704131	428595	61206	139438	227951	167783	2.909	1.408	74.85
p060-bdf1_029	mOSN	3015821	21691265	1.99806e+06	5447	7.07	1.45	2551452	512373	94379	134648	283346	173557	8.284	1.036	79.92
p060-bdf1_030	mOSN	2893439	21334625	1.77109e+06	5003	5.52	1.43	1719107	396088	89458	121596	185034	119771	3.617	/	76.96
p060-bdf1_031	mOSN	3232799	25086418	2.10583e+06	5142	5.46	1.16	2888124	536907	127893	183862	225152	177873	1.921	/	81.41
p060-bdf1_032	iOSN	2545447	17430144	1.61917e+06	4870	7.35	3.28	1275135	344354	49061	128124	167169	104615	17.231	/	72.99
p060-bdf1_033	mOSN	3052772	17939577	1.85515e+06	3277	6.18	1.39	1650614	370805	85410	118011	167384	111040	7.92	/	77.54
p060-bdf1_034	mOSN	2561780	18954680	1.67328e+06	4497	7.27	1.58	1213081	330698	69762	95545	165391	95073	18.983	/	72.74
p060-bdf1_035	mOSN	2577957	17950526	1.50511e+06	2809	11.19	1.61	1631726	345423	62767	92974	189682	93713	20.14	/	78.83
p060-bdf1_036	mOSN	2389247	16880057	1.42354e+06	3530	8.02	1.37	1403502	305018	62715	86813	155490	76679	20.756	/	78.27
p060-bdf1_037	mOSN	2905110	20710134	1.89751e+06	4849	5.89	1.25	1403687	311908	63369	92459	156080	75232	18.076	/	77.78
p060-bdf1_038	iOSN	2442448	20447527	1.11709e+06	2552	28.65	1.35	2519333	459537	63454	109878	286205	123670	10.627	/	81.76
p060-bdf1_039	mOSN	2031612	18145885	1.24998e+06	4185	11.49	1.55	1380378	302376	62940	89286	150150	80815	12.485	/	78.09
p060-bdf1_040	mOSN	2429555	17769404	1.54809e+06	5339	8.62	1.58	1952474	383270	82800	114622	185848	107109	6.386	/	80.37
p060-bdf1_041	mOSN	2761243	18288146	1.77242e+06	4130	8.46	1.37	1420898	304417	61265	81367	161785	79049	8.454	/	78.58
p060-bdf1_042	mOSN	2805064	19637894	1.6795e+06	3486	5.96	1.41	1660775	358742	76370	100311	182061	101794	7.302	/	78.4
p060-bdf1_043	iOSN	2423816	16531619	1.56571e+06	4039	11.7	4.88	1920043	471756	108496	175641	187619	159758	2.664	/	75.43
p060-bdf1_044	iOSN	2543026	14431590	1.56116e+06	4046	10.44	4.6	1249836	348240	69117	141845	137278	109813	13.997	/	72.14
p060-bdf1_045	mOSN	3154297	20536405	1.82415e+06	3815	6.2	1.62	2339420	532561	112813	159705	260043	179149	6.068	/	77.24
p060-bdf1_046	progenitor-1	2513939	18598033	1.3281e+06	3103	6.41	1.98	1713359	359755	71834	136122	151799	96959	22.301	/	79
p060-bdf1_047	iOSN	2457664	19042610	1.53065e+06	4528	11.28	5.95	1174686	330079	67526	121806	140747	93181	16.545	/	71.9
p060-bdf1_048	mOSN	2897283	17095691	1.73996e+06	4394	7.65	1.55	1439359	296451	63112	93622	139717	78413	14.646	/	79.4
p060-bdf1_049	iOSN	2280043	18614447	1.45104e+06	5544	7.28	4.41	1203981	274643	55377	77803	141463	63935	16.608	/	77.19
p060-bdf1_050	mOSN	2708669	15247014	1.67193e+06	3782	14.32	1.37	1183491	253533	52315	81454	119764	52852	32.366	/	78.58
p060-bdf1_051	mOSN	2636973	17017410	1.5776e+06	4194	9.45	2.27	1095760	295500	66123	91664	137713	85422	11.071	/	73.03
p070-bdf1_001	mOSN	4180074	15215777	2.09337e+06	5337	10.41	1.91	877770	436301	77935	134991	223375	176732	1.666	1.318	50.29
p070-bdf1_002	mOSN	3238332	13599938	1.54196e+06	5616	16.01	2.45	1778134	603507	145789	212956	244762	249734	0.743	/	66.06
p070-bdf1_003	mOSN	3060482	15213217	1.50521e+06	5523	9.54	1.67	1402781	670551	179358	269211	221982	270820	1.328	/	52.2
p070-bdf1_004	mOSN	3461388	16858742	1.68686e+06	4875	15.28	1.96	1629796	739844	167883	263853	308108	325486	0.747	/	54.61
p070-bdf1_005	iOSN	3401151	16482674	1.64763e+06	4914	11.23	3.8	1373630	574756	147124	250636	176996	230028	1.553	0.916	58.16
p070-bdf1_006	mOSN	3517865	17957386	1.62327e+06	4016	12.62	1.54	1057273	481961	111631	169468	200862	187284	1.211	/	54.41
p070-bdf1_007	mOSN	3416012	17621122	1.7241e+06	4862	13.34	1.28	1423452	608915	144213	211323	253379	248304	1.21	/	57.22
p070-bdf1_008	mOSN	3676001	17544970	1.63235e+06	4379	13.5	1.64	1199430	514218	117503	175314	221401	210650	0.808	/	57.13
p070-bdf1_009	progenitor-1	3334026	24549583	1.33114e+06	4998	14.78	1.71	1630296	652291	183665	322345	146281	241903	1.285	/	59.99
p070-bdf1_010	mOSN	3516045	15430110	1.7876e+06	6219	11.18	1.68	2173000	993512	237771	340461	415280	413176	8.716	/	54.28
p070-bdf1_011	mOSN	3320950	22107715	1.77767e+06	6515	15.69	1.54	1844250	671736	157076	250599	264061	286579	0.807	/	63.58
p070-bdf1_012	mOSN	3625893	19415334	1.71365e+06	4830	19.06	1.92	2025405	843084	223201	292201	327682	374404	0.579	/	58.37
p070-bdf1_013	mOSN	3948812	22200912	2.1216e+06	5550	13.8	1.44	2332947	888029	219836	302742	365451	404265	0.738	/	61.94
p070-bdf1_014	mOSN	3205203	15814612	1.79071e+06	6247	16.53	1.98	1803494	593457	158080	227193	208184	239557	0.788	/	67.09
p070-bdf1_015	mOSN	3477390	15648195	1.59405e+06	4553	12.58	2	2376653	776090	226945	278879	270266	324852	1.028	/	67.35
p111-bc_001	mOSN	3314499	13512367	2.05958e+06	3228	7.14	2.08	2818133	962464	227291	305078	430095	800910	2.782	/	65.85
p111-bc_002	mOSN	4222894	16488414	2.73797e+06	4225	4.94	1.2	2615659	880517	122497	230165	527855	737636	3.172	/	66.34
p111-bc_003	mOSN	3593623	24825114	2.4445e+06	5679	5.88	0.88	2548797	880998	178058	250538	452402	722667	2.381	/	65.43
p111-bc_004	mOSN	3574647	25679756	2.28727e+06	4498	3.92	0.95	684047	455190	56903	99698	298589	333248	2.181	/	33.46
p111-bc_005	mOSN	2954336	13255080	1.78195e+06	4290	3.52	1.53	2708663	847502	221861	287067	338574	705655	1.208	/	68.71
p111-bc_006	progenitor-1	1337170	13186458	441240	968	15.84	3.33	2450378	691385	107283	259056	325046	561250	2.886	1.318	71.78
p111-bc_007	iOSN	2978150	14405335	2.0014e+06	5799	4.27	2.19	2239114	729722	132475	208104	389143	609437	2.322	/	67.41
p119-bc_001	mOSN	1591336	14160745	842871	6819	13.46	1.22	2727954	595237	105176	137626	352435	482790	8.651	/	78.18
p119-bc_002	iOSN	1565200	18535363	636653	8054	13.33	1.89	2694563	322107	75747	96774	149586	281378	11.246	/	88.05
p119-bc_003	mOSN	2600346	14658991	899598	9497	13.49	0.87	3584072	552732	124667	156139	271926	468561	6.996	/	84.58
p119-bc_004	progenitor-2	2371924	20932775	1.19709e+06	7398	19.61	3.4	4505951	656388	154371	248041	253976	564173	2.344	/	85.43
p119-bc_005	mOSN	2686354	15578130	1.18142e+06	8121	25.02	0.98	2562348	576434	110716	147011	318707	498251	11.48	/	77.5
p119-bc_006	mOSN	3331145	25786768	1.79679e+06	7117	14.19	1.39	4413786	756608	164447	226997	365164	636376	2.668	/	82.86
p119-bc_007	mOSN	3062310	17525564	793176	11734	22.51	0.74	3233558	566610	139406	165352	261852	490042	3.894	/	82.48
p119-bc_008	mOSN	3058351	22757293	1.47757e+06	8229	22.15	0.86	1503662	325865	97868	91597	136400	272391	5.37	/	78.33
p119-bc_009	mOSN	2930042	17611585	900413	9394	15.62	1.02	2904708	562878	149167	180037	233674	473091	1.024	/	80.62
p119-bc_010	mOSN	2592890	21375525	1.21856e+06	8555	17.09	0.86	3404972	620229	152419	173124	294686	527123	2.17	/	81.78
p119-bc_011	progenitor-2	2606482	21542245	1.29469e+06	6145	24.3	1.31	4497325	891281	168556	378268	344457	769783	11.402	0.366	80.18
p119-bc_012	progenitor-2	2638328	13671627	1.47395e+06	9340	14.52	4.21	692722	140020	30875	28674	80471	95017	17.754	/	79.79
p119-bc_013	mOSN	2910030	23985830	1.30829e+06	7622	18.18	0.85	4106696	436736	99180	132633	204923	368048	13.442	/	89.37
p119-bc_014	mOSN	3299768	23712818	1.12824e+06	8380	11.25	0.69	3552582	544976	136776	163716	244484	457267	2.72	/	84.66
p119-bc_015	mOSN	2370152	17282221	1.01978e+06	7922	19.95	0.84	3130992	549561	130682	201420	217459	455938	2.184	/	82.45
p119-bc_016	progenitor-2	2860293	14828426	765807	11979	23.27	1.1	3194631	490919	119759	150565	220595	421535	0.989	/	84.63
p119-bc_017	progenitor-2	2775904	14933833	1.39811e+06	8255	9.1	0.88	2274643	262961	64738	93331	104892	207109	2.335	/	88.44
p119-bc_018	progenitor-2	2894364	26760074	1.8109e+06	7964	10.78	1.19	270635	53577	11996	14895	26686	35860	36.23	/	80.2
p119-bc_019	iOSN	4089773	20014622	1.3614e+06	12363	13.71	1.42	4086468	727647	139969	492234	95444	584602	26.828	/	82.19
p119-bc_020	mOSN	3869450	24880163	1.32841e+06	10018	11.38	0.92	4972664	452450	57499	80526	314425	334402	14.387	/	90.9
p119-bc_021	mOSN	4146955	13478121	1.62583e+06	9254	20.2	0.78	2743425	372140	90139	92499	189502	300964	1.704	1.175	86.44
p119-bc_022	mOSN	4458816	21435745	1.78056e+06	9753	21.9	0.74	4024223	428584	113382	116541	198661	349973	0.951	/	89.35
p119-bc_023	mOSN	5011018	12644726	2.59789e+06	7289	12.32	1.02	768870	255498	40247	56655	158596	191315	0.973	/	66.77
p119-bc_024	iOSN	3058427	16663798	1.59126e+06	6548	5.72	1.18	387946	91439	29053	30805	31581	72640	17.893	/	76.43
p119-bc_025	iOSN	3658514	13048285	2.09416e+06	7175	4.81	1.91	2616686	389148	91827	125713	171608	334530	18.046	/	85.13
p119-bc_026	mOSN	4408893	19854964	1.78679e+06	8941	11.24	1.18	2252107	356951	80946	98399	177606	287790	14.662	/	84.15
p119-bc_027	mOSN	5021593	19558635	2.0818e+06	9261	7.96	1.05	3296339	544017	142291	181189	220537	468625	10.868	/	83.5
p119-bc_028	mOSN	2654817	16957779	1.74408e+06	4785	5.15	1.1	3414250	1025593	184943	310446	530204	857736	0.271	/	69.96
